# Supplementary material for: Mutations in PpAGO3 Lead to Enhanced Virulence of Phytophthora parasitica by Activation of 25–26 nt sRNA-Associated Effector Genes
Source: Frontiers journal article supplement (doi:10.3389/fmicb.2022.856106), 2022-03-24
Supplement: Data_Sheet_1.ZIP [file Supplementary Figure 2.pdf › Supplementary Figure 2.pdf]

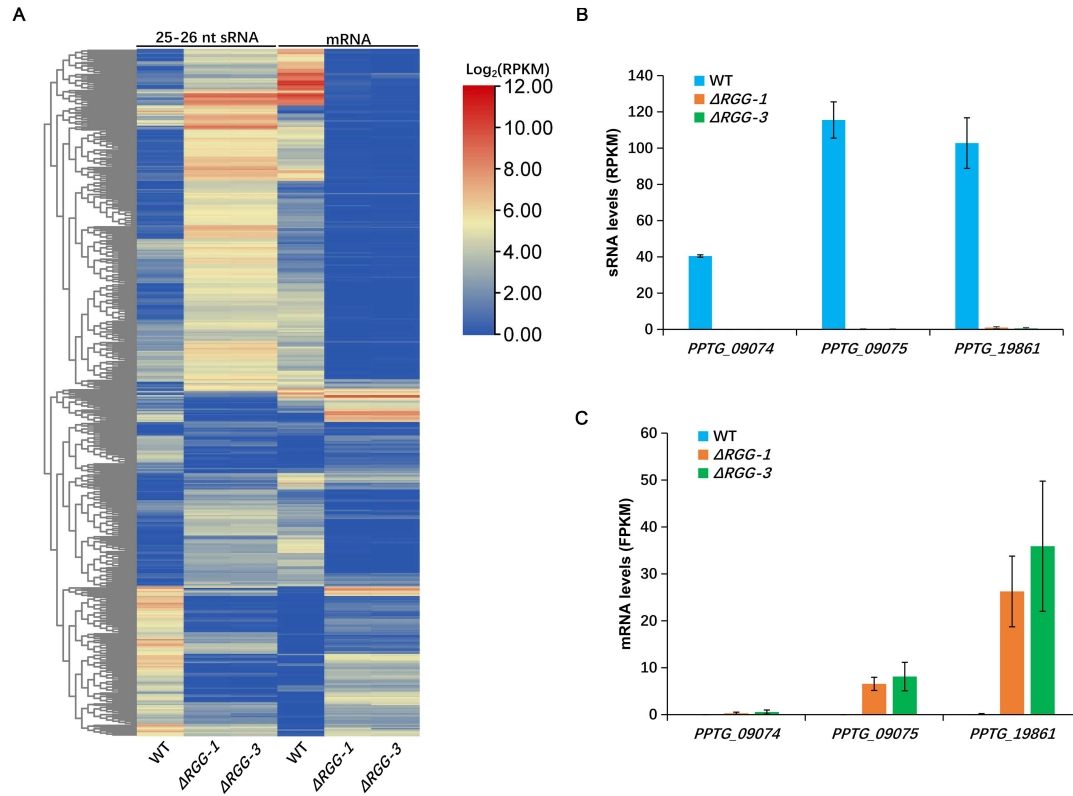

**Supplementary Figure 2.** The changed accumulation of 25-26 nt sRNAs and associated transcripts in mutants *PpAGO3<sup>ΔRGG1</sup>* and *PpAGO3<sup>ΔRGG3</sup>* is negatively correlated. **(A)** Heatmap for the expression of 25-26 nt sRNAs and associated transcripts of 509 non-cytoplasmic effector genes in the wild-type, and mutants *PpAGO3<sup>ΔRGG1</sup>* and *PpAGO3<sup>ΔRGG3</sup>*. **(B-C)** The histogram represents expression of 25-26 nt sRNAs and associated transcripts of three INF-like genes (*PPTG\_09074*, *PPTG\_09075* and *PPTG\_19861*).
