# Supplementary material for: Mutations in PpAGO3 Lead to Enhanced Virulence of Phytophthora parasitica by Activation of 25–26 nt sRNA-Associated Effector Genes
Source: Frontiers journal article supplement (doi:10.3389/fmicb.2022.856106), 2022-03-24
Supplement: Data_Sheet_1.ZIP [file Table S2.xlsx]

## Sheet: Sheet1
Supplementary Table 2. The 2578 genes those accumulate 25-26 nt sRNA differentially in PpAGO3ΔRGG1/3 mutants
		Total 25-26 nt sRNAs (RPKM)			Log2FoldChange		Padj
Geneid	Genetype	WT	PpAGO3ΔRGG1	PpAGO3ΔRGG3	PpAGO3ΔRGG1	PpAGO3ΔRGG3	PpAGO3ΔRGG1	PpAGO3ΔRGG3
PPTG_01869	RxLR	12.7917	0	0	-9.1816	-9.27165	5.76063e-13	3.25867e-13
PPTG_07435	RxLR	0.605888	18.9729	21.268	4.95182	5.09928	9.50699e-35	6.12569e-37
PPTG_15425	RxLR	2.92451	0.327846	0.102863	-3.15764	-4.92727	1.95877e-05	3.02607e-07
PPTG_20708	RxLR	6.61613	3.21774	2.6453	-1.04946	-1.35018	0.00496967	0.000245485
PPTG_01871	RxLR	0.724646	0	0	-5.03359	-5.12364	0.0378462	0.0329588
PPTG_01962	RxLR	21.6171	0.214093	0.27021	-6.75908	-6.36535	5.20772e-20	7.33378e-23
PPTG_02959	RxLR	1.24432	0	0	-5.86048	-5.95053	0.00308064	0.00256225
PPTG_03253	RxLR	0.0450475	7.91363	6.31096	7.37565	7.02876	1.44696e-08	7.24996e-08
PPTG_07112	RxLR	2.34605	18.1988	16.7104	3.00666	2.86282	4.3141e-21	3.53512e-19
PPTG_07116	RxLR	3.95946	16.1248	12.4955	2.05885	1.66887	2.63888e-13	5.88767e-09
PPTG_07703	RxLR	0.592426	25.0747	27.1206	5.36613	5.46074	2.43254e-33	1.35672e-34
PPTG_07989	RxLR	9.68386	0	0.165585	-8.76038	-5.98226	3.79801e-11	2.59289e-11
PPTG_08171	RxLR	0.908875	8.65625	9.36868	3.26312	3.35077	1.51184e-16	1.7163e-17
PPTG_08236	RxLR	0.531674	23.683	24.3739	5.55581	5.5781	1.31299e-31	6.60056e-32
PPTG_08655	RxLR	1.03782	3.02057	4.87251	1.51277	2.18111	0.0273381	0.000608862
PPTG_09764	RxLR	0.0313806	1.69271	1.20998	5.32209	4.83082	0.00029778	0.00121921
PPTG_09894	RxLR	0	0.710108	0.571567	4.78623	4.47284	0.00590472	0.0110825
PPTG_10475	RxLR	0.0831893	0.782716	0.90741	3.3879	3.57019	0.0194139	0.0121846
PPTG_10562	RxLR	17.3629	39.7125	38.6662	1.18113	1.12561	4.57819e-14	6.54361e-13
PPTG_11551	RxLR	29.3264	62.5422	67.9259	1.09072	1.19487	7.01251e-08	2.54905e-09
PPTG_12332	RxLR	6.25152	3.07507	2.46064	-1.01829	-1.36327	0.0108497	0.000539913
PPTG_12984	RxLR	0	1.19699	1.01555	5.74471	5.51702	0.000214779	0.00040875
PPTG_14088	RxLR	74.548	0	0	-11.5533	-11.6434	3.27062e-21	1.51636e-21
PPTG_15182	RxLR	0	3.44148	3.73905	7.17985	7.26368	1.03684e-07	6.90507e-08
PPTG_15196	RxLR	3.32649	0	0.0771401	-7.27911	-5.49702	5.95117e-07	3.6514e-05
PPTG_15277	RxLR	0	3.74854	3.98979	7.03532	7.11891	1.79043e-07	1.19076e-07
PPTG_15282	RxLR	0	0.866159	1.40131	4.91441	5.6101	0.00239265	0.000353228
PPTG_15317	RxLR	0.0220963	5.12026	5.82751	7.43241	7.60468	5.5884e-09	2.22214e-09
PPTG_17164	RxLR	1.47613	0.0944998	0	-4.00087	-5.95767	0.0260459	0.00115031
PPTG_17255	RxLR	0.949901	8.87661	7.5147	3.16029	2.89377	1.82317e-12	1.51151e-10
PPTG_17787	RxLR	0	10.0912	10.0168	9.18639	9.16235	1.81611e-13	2.04282e-13
PPTG_19191	RxLR	0.0490392	10.4678	10.9157	7.91168	7.95555	3.71102e-10	2.82954e-10
PPTG_19340	RxLR	4.53777	0.685382	0.771136	-2.77765	-2.59378	1.40717e-06	3.25236e-06
PPTG_19586	RxLR	0	4.98055	4.52182	7.94529	7.79094	4.89737e-10	1.06901e-09
PPTG_22668	RxLR	0.131884	14.9599	15.8667	6.86608	6.93076	1.10809e-14	5.71654e-15
PPTG_22729	RxLR	2.35872	11.6145	14.3741	2.26574	2.55226	1.44098e-09	4.61895e-12
PPTG_18920	CRN	81.7271	0	0.0369764	-11.7282	-10.8564	6.75194e-22	6.69964e-19
PPTG_18147	CRN	179.52	0.0753335	0.055862	-11.4214	-11.5083	1.0927e-27	4.44662e-28
PPTG_11304	CRN	0.167189	27.021	29.8664	7.4213	7.54887	2.79664e-59	2.32025e-61
PPTG_09076	CRN	106.063	0.254926	0.392733	-8.58787	-8.13924	3.06618e-66	3.10418e-84
PPTG_12078	CRN	0.119873	44.8935	48.9915	8.45437	8.56451	1.13518e-36	1.22246e-37
PPTG_22243	CRN	46.9854	4.3011	4.63106	-3.46645	-3.37235	1.6929e-119	1.15223e-118
PPTG_15032	CRN	17.4424	0.0782205	0	-7.59555	-9.5244	1.18773e-11	5.76505e-14
PPTG_11600	CRN	15.7959	33.4114	32.4126	1.07859	1.01661	1.82455e-16	8.98267e-15
PPTG_11786	CRN	0.165957	2.63247	2.96525	3.93898	4.08251	2.56365e-07	7.66506e-08
PPTG_01771	CRN	15.8224	0.0385598	0	-8.34592	-9.39776	5.30801e-11	1.05126e-13
PPTG_01844	CRN	6.51613	0.144669	0	-5.31049	-8.20212	7.38892e-08	2.47216e-09
PPTG_03595	CRN	3.17795	6.79925	6.60347	1.08436	1.02905	0.0139196	0.0198629
PPTG_05844	CRN	2.33404	0.511034	0.313258	-2.15239	-2.91776	0.00340119	0.000136902
PPTG_06039	CRN	6.20789	25.7858	26.3079	2.05479	2.06521	8.17096e-33	2.68654e-33
PPTG_06647	CRN	0.0358553	35.8308	44.4085	10.1346	10.4334	1.52206e-15	1.97959e-16
PPTG_08697	CRN	1.0313	4.64771	5.12712	2.1714	2.29119	3.72544e-07	6.10251e-08
PPTG_08700	CRN	0.880688	3.31892	3.72293	1.93015	2.08207	7.86167e-05	1.48212e-05
PPTG_11949	CRN	179.96	60.2233	61.406	-1.59162	-1.58236	5.46566e-43	9.57757e-43
PPTG_12683	CRN	3.1084	1.08276	1.36756	-1.52981	-1.21606	0.000636144	0.00604647
PPTG_14883	CRN	59.6171	7.13215	6.92752	-3.08758	-3.12069	1.0671e-47	2.86631e-49
PPTG_14894	CRN	51.3876	19.6868	21.9631	-1.38369	-1.24861	5.41983e-35	2.0881e-29
PPTG_14937	CRN	2.07785	22.95	22.8888	3.4956	3.46907	2.69455e-41	9.1231e-41
PPTG_14941	CRN	1.24193	6.54664	6.55572	2.40847	2.39313	4.1119e-07	4.59169e-07
PPTG_17734	CRN	8.9097	3.72008	3.91433	-1.28109	-1.22011	2.46767e-07	7.15957e-07
PPTG_17744	CRN	9.35327	4.12406	4.45546	-1.20264	-1.09904	3.31978e-07	2.57657e-06
PPTG_18520	CRN	3.19788	0.857595	0.36125	-1.94042	-3.16873	0.0013644	1.38796e-06
PPTG_20867	CRN	0	4.1794	4.5484	7.6386	7.7473	2.70101e-09	1.46442e-09
PPTG_21573	CRN	0.21633	112.775	138.165	8.98071	9.26085	4.3146e-30	5.84506e-32
PPTG_22380	CRN	1.1638	51.6898	50.1915	5.42223	5.36088	1.27696e-145	1.89987e-142
PPTG_22773	CRN	0.447415	34.8938	35.8828	6.41636	6.44161	2.00011e-85	3.58605e-86
PPTG_23268	CRN	40.6721	19.5189	18.1682	-1.06346	-1.18545	6.13679e-40	3.34182e-49
PPTG_23473	CRN	290.062	124.663	124.232	-1.2218	-1.24466	4.20707e-39	1.03794e-40
PPTG_23515	CRN	0	6.53143	6.69679	7.86128	7.88645	7.15556e-10	5.99515e-10
PPTG_23727	CRN	10.0027	22.2671	21.1656	1.14807	1.05871	6.16576e-26	3.31563e-22
PPTG_09075	INF-like	115.522	0.118064	0.141429	-9.93923	-9.70304	8.73445e-41	3.69903e-48
PPTG_19861	INF-like	102.773	0.570149	0.996921	-7.55977	-6.75134	3.27458e-72	2.68078e-95
PPTG_09074	INF-like	40.464	0	0	-10.8687	-10.9588	8.88263e-19	4.40611e-19
PPTG_09073	INF-like	54.0071	0.0353735	0	-10.2415	-11.2934	7.66097e-17	2.69983e-20
PPTG_19862	INF-like	6.60591	0.936507	1.35553	-2.85618	-2.31733	5.26239e-05	0.000939704
PPTG_19868	INF-like	0.991107	0.0302059	0	-4.69203	-5.74388	0.0131394	0.00176083
PPTG_00460	NPP-like	0	26.4325	30.9154	10.2944	10.4994	4.42324e-17	9.57408e-18
PPTG_00471	NPP-like	0	5.30611	7.2935	7.92313	8.36724	4.52116e-10	3.68503e-11
PPTG_06202	NPP-like	40.2881	0.0299746	0.235472	-10.0538	-7.44358	4.79068e-16	2.08209e-35
PPTG_08703	NPP-like	1.14036	14.6059	11.8883	3.66294	3.34589	8.40473e-28	3.41961e-23
PPTG_14652	NPP-like	0	1.94216	2.50212	6.51975	6.8747	2.20016e-06	4.82647e-07
PPTG_15220	NPP-like	1.08328	0.0860325	0	-3.78314	-5.80944	0.0450955	0.0024708
PPTG_16851	NPP-like	0.0311117	9.87034	10.7134	7.87804	7.98282	3.83047e-10	2.08965e-10
PPTG_17455	NPP-like	0.163596	1.53376	1.28879	3.25934	2.99393	0.00304571	0.00719964
PPTG_20067	NPP-like	7.17101	0	0	-8.0917	-8.18175	3.71628e-09	2.35927e-09
PPTG_23334		99.7348	0.0748034	0	-10.1609	-12.0977	6.82218e-22	2.39812e-23
PPTG_12577		0.0973353	73.7561	79.5093	9.69119	9.78463	1.05864e-29	2.84507e-30
PPTG_22437		0.0954965	78.1394	81.4217	9.77286	9.81649	5.08487e-40	2.18156e-40
PPTG_14848		20.8505	0	0.0449669	-9.71355	-8.84181	1.11641e-14	2.41579e-12
PPTG_05418		182.645	0.167506	0.212337	-10.1902	-9.7908	9.66414e-54	9.52404e-69
PPTG_08230		44.4052	0	0	-10.8941	-10.9842	7.77796e-19	3.86702e-19
PPTG_04491		0.0837257	16.4265	16.3475	7.65731	7.6289	2.23535e-12	2.62527e-12
PPTG_14207		30.5153	0	0.0695144	-10.6549	-8.89047	5.44297e-18	1.23169e-16
PPTG_14907		29.7347	0.0392917	0	-9.51659	-10.5684	1.81053e-14	1.21029e-17
PPTG_12576		0.11115	105.622	108.859	9.81304	9.8393	1.9276e-30	1.30107e-30
PPTG_00682		0.0371503	36.5424	34.2431	10.1106	9.99791	1.58348e-16	3.41828e-16
PPTG_23470		27.6882	0.059303	0.0585928	-8.82305	-8.9131	2.16492e-12	1.22916e-12
PPTG_13528		94.325	0	0	-13.4191	-13.5092	1.21667e-28	5.07433e-29
PPTG_07891		0.0833386	33.2167	33.0063	8.56037	8.53356	4.68355e-23	6.17018e-23
PPTG_24862		0.0430062	20.7973	21.7806	8.83441	8.88973	1.08671e-12	7.45502e-13
PPTG_24865		1.07933	236.766	236.297	7.7005	7.68168	2.38794e-104	7.02138e-104
PPTG_04999		0.0750779	17.0502	16.2624	7.70775	7.61675	1.11327e-12	2.04349e-12
PPTG_12578		0.477452	111.678	119.824	7.99468	8.07924	5.64721e-96	4.52868e-98
PPTG_24891		0	14.4649	13.9161	9.04258	8.974	3.69946e-13	5.4556e-13
PPTG_12638		76.486	0.158014	0.0678631	-9.05384	-10.1417	9.92542e-34	7.98974e-22
PPTG_06840		4.18957	511.878	525.126	6.91135	6.93223	0	0
PPTG_05563		0	8.18375	7.93063	8.17726	8.11581	1.06692e-10	1.45144e-10
PPTG_12488		0.10403	43.1364	44.933	8.98621	9.02433	2.25684e-17	1.59732e-17
PPTG_04054		0.286016	100.817	102.502	8.55714	8.56626	3.51122e-60	2.47438e-60
PPTG_04158		0.325427	158.258	155.187	8.8867	8.84123	1.75568e-64	7.48693e-64
PPTG_19028		0.90169	67.4171	71.2903	6.265	6.32816	2.23996e-193	1.61714e-197
PPTG_06404		0.0366771	26.2464	27.6196	9.40605	9.46132	1.92769e-14	1.28252e-14
PPTG_07465		0	34.1883	33.9054	10.9047	10.8803	4.23591e-19	4.98924e-19
PPTG_07888		0.166868	38.2633	39.7114	7.87125	7.90637	1.12537e-30	5.79738e-31
PPTG_12077		0.0264742	21.5663	23.6407	9.59312	9.70923	5.70369e-15	2.49947e-15
PPTG_21007		17.2421	0	0	-9.46958	-9.55963	7.21897e-14	3.97336e-14
PPTG_07518		4.34099	333.053	343.86	6.20585	6.2356	0	0
PPTG_24908		2.41158	287.828	303.493	6.94609	7.00758	6.26304e-174	3.89365e-177
PPTG_17083		0.274964	89.6643	92.2614	8.43945	8.46519	1.04289e-65	3.83803e-66
PPTG_03100		0	15.3264	15.1924	9.7072	9.67295	3.70019e-15	4.51238e-15
PPTG_20091		1.13648	190.392	192.316	7.35606	7.35458	1.3948e-145	1.35458e-145
PPTG_24461		33.7658	0	0.0451051	-10.1628	-9.29102	3.79441e-16	1.15812e-13
PPTG_06968		3.14856	377.252	393.298	6.92632	6.97123	1.12125e-171	5.85999e-174
PPTG_23110		0.0435563	35.3879	36.1534	9.24167	9.25396	5.9573e-14	5.32173e-14
PPTG_16181		0.345123	100.1	104.361	8.1911	8.23392	6.00513e-102	4.65311e-103
PPTG_12037		5.15382	0	0	-7.54748	-7.63753	6.89779e-08	4.64347e-08
PPTG_04512		21.7702	0.0558965	0	-8.61349	-10.5518	1.38494e-15	1.28382e-17
PPTG_05705		0.374403	56.2605	58.4575	7.3421	7.37719	8.3407e-70	1.58748e-70
PPTG_19637		0.14867	83.1897	86.4655	9.3382	9.37819	1.17173e-27	6.71261e-28
PPTG_23459		0	23.7201	24.882	9.45231	9.50842	2.3816e-14	1.57381e-14
PPTG_02512		6.39604	598.746	622.71	6.54064	6.58183	0	0
PPTG_20860		57.792	0.0549246	0	-9.99076	-11.0426	5.55107e-16	2.48611e-19
PPTG_06897		3.83847	372.239	389.148	6.57308	6.62151	0	0
PPTG_10170		0.0626428	6.42981	5.77784	6.71675	6.54339	1.45904e-09	3.9385e-09
PPTG_05047		0.11313	88.7983	85.5487	9.36631	9.29458	4.5387e-63	3.90896e-62
PPTG_07968		0	5.47843	4.82909	8.34567	8.13896	5.09343e-11	1.54154e-10
PPTG_20313		0	19.7045	18.7539	9.4026	9.30781	4.89324e-14	8.72709e-14
PPTG_09382		18.759	0	0	-9.72859	-9.81864	1.05233e-14	5.61619e-15
PPTG_07519		2.29222	230.523	230.918	6.59472	6.58037	6.63209e-206	4.23215e-205
PPTG_21847		0.192159	49.568	50.5356	7.98004	7.99283	3.7068e-32	2.85359e-32
PPTG_06814		5.0421	438.267	464.074	6.48176	6.54891	1.96254e-294	9.86489e-301
PPTG_20861		28.6868	0.0521036	0	-9.05647	-10.1083	4.48854e-13	4.59535e-16
PPTG_21006		17.6042	0.0519822	0.0498895	-8.36765	-8.4577	7.69522e-11	4.59614e-11
PPTG_18919		74.2463	0	0	-11.6203	-11.7104	1.57446e-21	7.31738e-22
PPTG_04425		1.16366	96.4376	110.718	6.2733	6.45795	5.68242e-118	3.2181e-125
PPTG_01878		0.0351487	7.56776	8.54737	7.31937	7.48278	8.19441e-09	3.42608e-09
PPTG_06401		0.133641	58.236	58.3826	8.46441	8.44984	3.69346e-37	4.62396e-37
PPTG_17167		0.0314797	3.5244	4.42625	6.97068	7.28625	6.64229e-08	1.4259e-08
PPTG_21226		0.0974239	34.5741	34.6112	8.34691	8.33372	8.64942e-15	9.13559e-15
PPTG_17555		0.181783	20.3884	19.6969	6.78931	6.72064	1.32525e-27	4.48384e-27
PPTG_17556		0.0583188	14.3631	14.7906	8.11107	8.13889	8.13966e-11	6.74938e-11
PPTG_24861		0	4.77976	6.44383	7.44087	7.8545	9.77324e-09	1.12554e-09
PPTG_08559		0.191754	11.3194	10.3689	5.80645	5.66244	2.77329e-19	2.2067e-18
PPTG_23980		237.887	0.221638	0.227241	-10.1255	-10.0598	3.49494e-94	6.12276e-103
PPTG_19067		0.372897	19.5997	20.4664	5.84335	5.89422	9.6012e-26	3.19079e-26
PPTG_10171		0.209535	11.6497	11.0268	5.78388	5.69001	2.15701e-22	1.02743e-21
PPTG_05452		0.0281808	8.52748	9.11546	7.81846	7.89248	7.83555e-10	5.0999e-10
PPTG_10018		0.428806	88.7526	70.5965	7.71914	7.37336	1.34024e-56	1.05953e-51
PPTG_20948		0.260053	45.2365	44.3778	7.46717	7.42249	2.40069e-28	4.97622e-28
PPTG_20450		0.259718	26.6576	22.3582	6.50183	6.22673	5.60849e-24	4.68102e-22
PPTG_09758		1.29317	123.724	127.275	6.59056	6.61361	1.87743e-120	2.1336e-121
PPTG_03101		0	9.03154	8.40642	8.744	8.62354	2.50231e-12	5.00443e-12
PPTG_17276		0.0503876	36.5972	39.0129	9.54649	9.6213	1.41101e-19	6.92579e-20
PPTG_19554		12.4069	0	0.0110035	-10.7608	-9.88906	2.21776e-18	1.12011e-15
PPTG_22385		0.123997	14.3976	15.6289	7.06417	7.16878	2.17561e-15	7.61715e-16
PPTG_24092		1.05782	215.945	227.071	7.59028	7.64715	1.88131e-113	3.22334e-115
PPTG_08264		0.0513337	18.0042	19.5927	8.62614	8.72652	3.38539e-12	1.78779e-12
PPTG_00204		0.869525	445.682	453.281	8.96361	8.97036	4.80751e-153	2.56546e-153
PPTG_24055		0.145082	12.9922	13.0238	6.50695	6.49982	6.20558e-13	6.29049e-13
PPTG_06832		0.560398	36.7717	39.4938	6.03604	6.11996	1.27856e-96	1.738e-99
PPTG_22252		0.0756023	30.7343	31.9061	8.69519	8.73144	5.91926e-24	3.66528e-24
PPTG_08549		0.0254656	49.3455	37.4493	10.4936	10.0834	6.35546e-17	1.04703e-15
PPTG_02455		124.924	0.0420824	0.156659	-11.4911	-9.68975	3.86934e-21	1.46615e-38
PPTG_21217		0.149827	47.5171	45.6022	8.23106	8.15246	2.22001e-21	5.31006e-21
PPTG_05420		81.2273	0	0	-11.946	-12.0361	9.40864e-23	4.24327e-23
PPTG_08500		0.162168	90.5926	90.2423	9.28721	9.26165	7.44325e-36	1.10642e-35
PPTG_21227		0.204972	44.8997	44.5873	7.9326	7.90544	1.11318e-25	1.60639e-25
PPTG_10146		0.156004	49.9429	51.741	8.01716	8.05368	1.15473e-26	6.48766e-27
PPTG_03155		0.0855768	35.7455	33.1232	8.6263	8.50086	1.53196e-23	6.69522e-23
PPTG_16665		0.280837	27.9618	27.3572	6.74451	6.69551	8.79497e-32	2.35173e-31
PPTG_11531		0.182204	31.6855	33.2714	7.48199	7.53823	4.56707e-23	1.96834e-23
PPTG_15040		0.405547	44.0744	46.7627	6.90844	6.97651	1.04222e-51	9.23875e-53
PPTG_15041		0.0898379	49.1763	49.9195	9.11795	9.12288	7.5574e-18	7.12723e-18
PPTG_04236		165.159	0	0.0855141	-12.7943	-11.0311	4.64119e-26	8.82332e-26
PPTG_23759		0.124336	18.6381	23.1315	7.04542	7.34425	1.66507e-15	8.44613e-17
PPTG_13530		64.2199	0	0.0338198	-11.7479	-10.8762	5.16453e-22	5.27205e-19
PPTG_06355		0.0332931	6.06933	6.4455	7.4362	7.50743	5.75259e-09	3.85293e-09
PPTG_22514		7.30866	0	0	-8.42962	-8.51968	1.33456e-10	8.11336e-11
PPTG_20113		0.395234	30.6945	31.5577	6.34453	6.366	1.5331e-31	8.76975e-32
PPTG_24315		0.294398	44.7435	47.7449	7.17975	7.25097	4.19833e-31	9.80809e-32
PPTG_14303		54.8704	0.117309	0.230976	-8.72874	-8.00063	5.31204e-31	5.62333e-44
PPTG_21121		0.0644889	14.4759	13.437	7.97822	7.85958	2.1229e-10	3.95636e-10
PPTG_16556		61.263	0.0640903	0.0396091	-9.9294	-10.6003	6.68471e-31	7.62381e-24
PPTG_03219		0.117003	37.7376	36.7797	8.03207	7.97721	2.56664e-20	4.58065e-20
PPTG_21008		11.8301	0	0	-8.61874	-8.70879	5.82266e-11	3.47527e-11
PPTG_23659		3.90787	0	0	-7.054	-7.14405	2.70025e-06	1.93726e-06
PPTG_24609		0	24.1085	23.8569	9.57519	9.54201	1.09102e-14	1.30264e-14
PPTG_16666		0.246319	24.2086	23.4321	6.69856	6.63174	8.65881e-27	2.752e-26
PPTG_03040		0.127623	47.6764	44.1322	8.46749	8.34095	1.37876e-22	5.90702e-22
PPTG_24046		26.0178	0	0	-9.94016	-10.0302	1.8079e-15	9.59427e-16
PPTG_19965		0	18.9561	16.8244	9.39287	9.20332	3.2499e-14	1.0792e-13
PPTG_02522		25.2706	0.136956	0.125318	-7.62535	-7.71331	4.56707e-23	1.43292e-23
PPTG_03377		27.4844	0.0858318	0	-8.52379	-10.4664	2.701e-15	2.5291e-17
PPTG_13643		0.312803	18.9301	20.4779	5.66536	5.7632	2.62887e-29	2.30066e-30
PPTG_22614		0.0316207	19.562	23.7993	9.19742	9.46579	2.61717e-25	8.96182e-27
PPTG_21701		0.162741	27.7326	29.2458	7.34273	7.40759	7.55474e-17	3.78159e-17
PPTG_22176		0.0858629	13.6425	14.815	7.19407	7.29669	4.83786e-11	2.3495e-11
PPTG_04490		0.0570651	7.67579	8.39015	7.23863	7.35109	1.41977e-08	7.80072e-09
PPTG_12639		51.4179	0.0521621	0.0468826	-10.0329	-10.123	4.03984e-16	2.10957e-16
PPTG_21969		2.49002	214.721	219.408	6.43574	6.45255	2.70228e-133	4.30467e-134
PPTG_04237		35.1903	0.167464	0.0883874	-7.64778	-8.72719	1.1242e-22	7.02392e-16
PPTG_15849		0.192762	67.6151	84.8581	8.64139	8.94755	4.15934e-38	7.83262e-41
PPTG_09759		1.03502	112.546	110.563	6.80056	6.7581	1.09431e-151	7.2635e-150
PPTG_07932		1.67927	130.612	139.646	6.3085	6.38858	6.30559e-168	2.0843e-172
PPTG_24860		0.331441	39.8381	40.3213	6.96885	6.97003	5.47476e-83	4.58652e-83
PPTG_13642		0.326086	22.8728	23.0299	6.04331	6.04063	4.74531e-27	4.72102e-27
PPTG_24708		34.7828	0.0828438	0.213742	-8.59921	-7.45489	9.70041e-23	3.56097e-37
PPTG_20779		0.123475	39.8533	43.9935	8.15282	8.28004	4.988e-21	1.09848e-21
PPTG_14060		0.855686	32.9267	32.2195	5.3379	5.28556	3.97065e-76	1.03471e-74
PPTG_07889		0.0283947	17.121	18.0887	9.15461	9.21766	1.36589e-13	8.83111e-14
PPTG_22882		0.354522	84.8907	87.0484	7.91506	7.93403	4.95033e-134	1.00538e-134
PPTG_09453		0.0357019	43.2073	47.3194	9.81428	9.93015	1.08079e-15	4.6598e-16
PPTG_22434		12.5732	0.428911	0.373977	-4.87379	-5.12264	6.11221e-16	2.78576e-16
PPTG_03287		0.139483	25.1859	27.6903	7.52553	7.64114	3.28657e-17	9.83084e-18
PPTG_05065		0.440804	40.5086	39.66	6.62836	6.57889	1.45156e-69	1.40055e-68
PPTG_14364		0.750421	44.5468	42.0835	5.89398	5.79214	4.7552e-104	1.58843e-100
PPTG_22463		96.0268	0	0	-12.2282	-12.3183	1.0446e-23	4.71527e-24
PPTG_24359		0.2178	47.8309	46.6534	7.80696	7.75771	2.70831e-25	5.32224e-25
PPTG_22327		0.0552937	15.4443	16.4618	8.04462	8.11858	1.38727e-10	8.91814e-11
PPTG_02743		0.785486	53.1601	54.9844	6.01166	6.04123	2.681e-60	5.8123e-61
PPTG_01112		1.25932	25.5384	30.2742	4.26746	4.49487	3.38727e-50	6.47407e-56
PPTG_22812		0.639959	137.595	140.96	7.7598	7.77968	3.17237e-107	8.25241e-108
PPTG_23335		94.7936	0.803391	1.01879	-6.90973	-6.5086	4.07239e-93	5.25774e-109
PPTG_02999		24.0082	0.830505	0.300938	-4.83836	-6.28563	1.25594e-27	7.52401e-24
PPTG_21938		0.234212	26.4508	23.7012	6.87026	6.69776	7.75761e-51	2.45847e-48
PPTG_02026		0.339672	73.0572	68.3183	7.77846	7.66396	1.13088e-42	1.87232e-41
PPTG_22305		0.440399	52.2179	52.7806	6.8514	6.84755	1.96335e-41	2.05728e-41
PPTG_18354		13.8443	0	0	-8.93909	-9.02914	3.18975e-12	1.84154e-12
PPTG_08944		64.6892	1.13902	1.39787	-5.79478	-5.52983	5.56204e-76	1.08323e-80
PPTG_22659		0	16.8037	16.0367	9.21943	9.13136	1.27663e-13	2.15171e-13
PPTG_22232		2.08611	77.0655	84.7321	5.15804	5.27912	1.56571e-97	2.17459e-102
PPTG_17212		0.112122	9.69837	9.77576	6.45707	6.44914	1.39992e-16	1.46176e-16
PPTG_24843		0.59393	23.9089	22.6851	5.48007	5.39252	2.01476e-26	1.27296e-25
PPTG_16952		3.42923	0	0	-7.47519	-7.56524	1.56564e-07	1.06741e-07
PPTG_19584		0.285067	39.6357	43.4283	7.31255	7.42796	6.00555e-43	2.49281e-44
PPTG_24859		0.292182	45.924	46.9098	7.3039	7.3183	8.79107e-68	4.31096e-68
PPTG_24811		0.0752198	8.74908	8.77801	6.81188	6.8027	2.08552e-32	2.42395e-32
PPTG_21144		0.156932	5.26448	5.29605	5.21675	5.20507	2.95211e-10	3.09028e-10
PPTG_04513		13.9755	0.0731591	0.0376931	-7.58146	-8.55798	7.44538e-12	1.3516e-11
PPTG_03590		14.7243	0.127011	0.217422	-6.95037	-6.05198	4.57377e-22	1.88012e-28
PPTG_06699		0.36825	13.3485	14.2522	5.17412	5.25909	8.78089e-21	1.65607e-21
PPTG_21120		0	9.26671	9.88615	8.44213	8.51776	2.2001e-11	1.35984e-11
PPTG_21700		0.446903	18.5612	17.9109	5.2621	5.19301	6.77213e-33	4.40813e-32
PPTG_24968		0.388156	33.1336	34.7712	6.49645	6.5526	7.38647e-35	1.69174e-35
PPTG_06700		0.615975	13.7072	15.5849	4.48637	4.65685	2.12479e-29	9.24187e-32
PPTG_01507		0.827888	25.1254	24.0014	4.93507	4.85387	1.66134e-53	8.39254e-52
PPTG_19710		39.2288	1.43389	0.832547	-4.81158	-5.55481	8.78839e-38	2.49735e-38
PPTG_14885		0.821284	13.0601	13.6045	3.94831	3.99129	8.70877e-48	5.29563e-49
PPTG_14538		0.19205	86.8787	90.4388	8.66739	8.70934	1.9566e-38	8.01767e-39
PPTG_07861		0.139149	6.30686	8.25522	5.62347	5.98	2.80134e-09	2.0254e-10
PPTG_17215		0.985626	74.7035	77.9315	6.25945	6.305	7.56177e-104	1.84243e-105
PPTG_14932		5.96282	0	0.125207	-7.85816	-5.52209	6.46819e-09	1.15721e-07
PPTG_14891		0.0837826	3.01997	2.41159	5.19073	4.85452	2.18234e-05	8.21683e-05
PPTG_19235		0.0573434	19.0964	20.4858	8.55408	8.63639	6.30723e-12	3.74311e-12
PPTG_02454		71.7812	0.38888	0.523228	-7.43688	-7.13853	1.34882e-52	2.32391e-61
PPTG_01877		0.177576	6.79562	5.02253	5.27886	4.82523	9.25619e-11	4.09951e-09
PPTG_21307		1.97597	0	0.0277216	-8.53081	-6.18215	5.64529e-11	1.83244e-10
PPTG_16854		0.0193209	20.3224	19.1845	10.2078	10.1055	8.79253e-17	1.79081e-16
PPTG_12710		263.328	3.84903	3.97208	-6.09572	-6.06474	0	0
PPTG_20636		0.81578	12.0824	11.3904	4.00571	3.90577	4.30939e-18	2.99454e-17
PPTG_21023		87.3308	2.6024	1.82212	-5.09349	-5.59974	1.60137e-137	5.33589e-137
PPTG_14933		142.021	0.118464	0.171356	-10.2563	-9.60649	5.57829e-33	2.84154e-47
PPTG_06744		0	1.9254	2.33972	6.42079	6.66977	2.74946e-06	9.44324e-07
PPTG_06701		0.639766	17.1876	18.2451	4.73378	4.80432	3.52277e-28	4.38999e-29
PPTG_02413		0.765769	19.6076	18.4652	4.59127	4.48985	8.9767e-59	3.02069e-56
PPTG_14886		0.538738	7.49369	7.34392	3.75774	3.72388	1.69033e-12	2.52728e-12
PPTG_15356		22.2675	0.427484	0.598299	-5.67819	-5.29168	1.2041e-32	1.11255e-33
PPTG_23401		27.6266	0.979696	1.00089	-4.81389	-4.84595	3.1323e-51	4.53247e-53
PPTG_06383		18.7732	0.442872	0.364421	-5.41236	-5.80378	1.44898e-20	1.58731e-20
PPTG_24858		0.129581	7.73148	9.694	5.7231	6.03336	7.74982e-10	7.14127e-11
PPTG_20889		0.69171	81.2476	83.6186	7.01416	7.03825	9.35718e-59	3.34488e-59
PPTG_16660		16.7234	0.0231099	0	-9.16473	-10.2166	2.04302e-13	1.88308e-16
PPTG_13329		0.785932	40.439	43.103	5.64941	5.72077	3.44083e-58	9.36773e-60
PPTG_21122		0.29642	7.74091	8.20201	4.60876	4.67133	8.04629e-16	2.77616e-16
PPTG_23965		4.12828	169.539	175.696	5.38113	5.4177	6.9373e-63	9.10357e-64
PPTG_25035		1.9182	22.0601	24.5101	3.54859	3.67832	2.29588e-29	1.05735e-31
PPTG_04986		0	3.16257	3.24506	7.03494	7.04697	1.36799e-07	1.25398e-07
PPTG_07958		0.0449015	1.10675	1.39196	4.53139	4.85529	0.00335529	0.00140404
PPTG_24771		0.221715	6.41151	5.53435	4.61976	4.39744	1.23261e-14	2.47127e-13
PPTG_14304		38.5075	0.118962	0.30693	-8.2255	-7.07918	1.28721e-20	1.01238e-32
PPTG_14887		0.857001	10.7452	10.7374	3.66217	3.64622	1.5807e-32	2.42296e-32
PPTG_22636		0.058819	8.53721	9.8819	7.35617	7.54199	8.26362e-09	3.1038e-09
PPTG_18825		1.90969	35.6698	35.4753	4.26392	4.23689	2.87807e-102	3.67146e-101
PPTG_02027		0.654169	48.3468	46.5705	6.18036	6.11045	7.42828e-54	1.09952e-52
PPTG_05451		0	5.10835	6.31183	7.49658	7.78669	7.17973e-09	1.55472e-09
PPTG_17048		0.171763	9.19363	11.4143	5.5821	5.87873	4.17197e-15	9.91977e-17
PPTG_23222		0.342941	55.3835	56.2099	7.46172	7.46842	8.94151e-34	7.3076e-34
PPTG_21145		0.254676	5.69708	5.35405	4.58428	4.48059	6.47503e-11	1.75073e-10
PPTG_05446		68.9496	0.299736	0.42738	-7.88607	-7.38611	2.80005e-48	6.5086e-61
PPTG_02744		3.27609	65.8569	69.5509	4.31255	4.37367	3.07057e-128	2.27099e-132
PPTG_21101		2.77028	64.0959	66.9544	4.55893	4.60421	2.27784e-152	9.038e-156
PPTG_15163		0	3.34761	3.99538	8.04174	8.2652	4.25045e-10	1.2224e-10
PPTG_14692		26.5186	0.257493	0.189681	-6.53114	-7.18721	5.60576e-23	6.68859e-20
PPTG_13659		55.0255	2.41866	3.24339	-4.53062	-4.11403	5.95481e-108	3.50868e-104
PPTG_12518		7.65045	0	0.107514	-8.59294	-6.23183	8.12303e-11	3.69566e-10
PPTG_12723		3.3371	87.2428	88.029	4.71688	4.71457	4.02063e-134	3.55655e-134
PPTG_23847		0.660874	21.3789	21.5246	4.97153	4.96825	7.01863e-67	6.65528e-67
PPTG_11708		27.815	1.08868	1.14553	-4.69799	-4.61867	7.77406e-55	1.20532e-56
PPTG_02414		1.97703	26.2748	27.4654	3.69924	3.74717	1.84612e-80	6.73047e-83
PPTG_05450		0.362547	5.77178	4.88624	3.9554	3.69961	2.10812e-10	3.41797e-09
PPTG_21888		1.52049	124.788	129.64	6.4129	6.45294	3.42458e-110	1.14552e-111
PPTG_22207		2.01122	23.7194	27.0991	3.56749	3.74237	4.24808e-30	2.54903e-33
PPTG_20150		1.25824	26.3885	25.0301	4.33429	4.24637	5.44306e-36	1.32646e-34
PPTG_03000		23.9015	1.55445	1.48277	-3.91785	-4.04217	6.20938e-37	7.93581e-39
PPTG_23857		3.87239	95.4354	111.348	4.60705	4.80808	1.29381e-110	5.47824e-121
PPTG_11239		10.0769	102.952	97.9251	3.3445	3.25515	1.98684e-157	3.40388e-149
PPTG_08945		162.153	10.8606	12.4102	-3.8927	-3.72692	4.67226e-163	2.92879e-158
PPTG_18366		0.061363	32.6829	32.4543	9.23193	9.20161	1.42195e-13	1.67499e-13
PPTG_19836		0.93364	21.131	24.3926	4.49166	4.68306	6.43481e-27	2.38659e-29
PPTG_21242		2.92802	70.7383	75.9828	4.56372	4.65097	1.23073e-131	3.63577e-137
PPTG_21673		140.361	0.0416059	0.0747895	-11.8137	-11.0123	2.51213e-22	1.17085e-25
PPTG_07853		2.41281	18.4825	19.0982	2.90095	2.93133	4.65816e-28	9.19678e-29
PPTG_12519		0.0121747	4.13115	3.76876	7.97753	7.82989	1.8348e-10	4.02118e-10
PPTG_22507		0.241438	22.1746	22.4728	6.42625	6.42662	5.35089e-40	4.85671e-40
PPTG_22218		1.75523	56.9719	68.3287	5.02719	5.27199	8.83991e-158	2.94761e-174
PPTG_14881		0.556688	4.74932	6.09478	3.00117	3.34728	1.38277e-10	4.06348e-13
PPTG_20490		0.753352	8.51937	10.2571	3.59894	3.8483	1.24374e-17	3.09866e-20
PPTG_23647		9.77998	0.215806	0.293609	-5.43864	-5.03889	3.57442e-12	3.44252e-13
PPTG_23860		0.731553	9.41914	18.2021	3.69641	4.63757	2.37743e-19	1.25306e-30
PPTG_14928		30.8993	0.867553	0.829977	-5.12921	-5.2939	2.001e-35	9.5915e-37
PPTG_09738		1.58739	52.0368	53.0951	5.12425	5.13149	1.06534e-63	5.54579e-64
PPTG_23588		2.94258	29.8265	31.6695	3.34868	3.4141	1.1111e-31	4.59593e-33
PPTG_01854		34.248	1.15039	0.987611	-4.93955	-5.13746	5.42248e-59	2.17517e-61
PPTG_02004		1.95593	47.2261	48.3236	4.57982	4.59444	5.80366e-105	7.36742e-106
PPTG_24388		106.232	0.0110116	0.0109681	-12.9002	-12.9903	1.30987e-26	5.62677e-27
PPTG_14888		1.78464	13.6563	12.4606	2.94919	2.80577	2.93402e-16	8.76203e-15
PPTG_14912		16.968	0.326657	0.209813	-5.63895	-6.24298	8.39185e-24	1.85371e-22
PPTG_21501		0.349183	19.8116	19.8197	5.78681	5.7712	1.20994e-28	1.5881e-28
PPTG_16149		4.11085	45.6853	48.89	3.45898	3.53824	1.93673e-139	9.64301e-147
PPTG_08263		1.25729	19.0715	18.2693	3.83506	3.76298	1.33943e-24	9.5386e-24
PPTG_23638		20.111	1.20192	0.975738	-4.08094	-4.40291	3.92831e-65	6.31473e-69
PPTG_24270		3.50694	34.3879	36.5015	3.2744	3.34496	7.56107e-68	3.25684e-71
PPTG_21264		0.512911	26.5336	28.3496	5.61703	5.69173	4.96277e-31	6.66717e-32
PPTG_05444		75.1852	0.0570765	0.0963469	-10.1456	-9.6442	9.36726e-22	6.05176e-29
PPTG_20159		18.8344	0.302147	0.112208	-5.98068	-7.47837	2.36598e-24	9.48595e-17
PPTG_11096		0.0561582	35.3043	34.6581	8.99191	8.94754	2.20244e-17	3.14851e-17
PPTG_04073		9.9563	77.1227	84.7569	2.95332	3.07632	8.69123e-61	2.71645e-66
PPTG_14467		21.5278	0	0	-10.2672	-10.3572	1.63754e-16	8.53208e-17
PPTG_04330		2.30762	28.4809	30.0627	3.60517	3.66157	1.15221e-50	1.73206e-52
PPTG_09381		7.99623	0.529535	0.638787	-3.90997	-3.67035	1.6132e-17	2.58599e-17
PPTG_23880		2.48638	65.6509	68.6982	4.71463	4.76203	2.67836e-101	1.31343e-103
PPTG_16006		5.83784	61.9778	64.4305	3.43853	3.47601	2.85756e-82	2.34045e-84
PPTG_14925		17.9099	4.27131	1.31176	-2.05526	-3.79274	9.34773e-09	8.75142e-22
PPTG_07672		0.444835	12.9259	13.803	4.89917	4.9728	4.69745e-16	1.45521e-16
PPTG_07959		0.12845	2.94566	2.79358	4.67797	4.57366	0.000161672	0.000232039
PPTG_09739		2.30777	32.5393	33.3516	3.81087	3.82763	8.82314e-62	1.55335e-62
PPTG_06351		0.316139	5.67207	5.53629	3.99474	3.94199	5.77269e-12	1.06969e-11
PPTG_18335		7.96504	164.091	171.119	4.34618	4.38992	2.12303e-224	1.85945e-229
PPTG_17471		0.780367	12.152	12.6535	3.94269	3.9835	9.65516e-21	3.03083e-21
PPTG_14654		15.5421	144.639	141.498	3.196	3.14815	4.76243e-258	1.05337e-250
PPTG_02511		1.03753	46.5581	54.812	5.51011	5.72959	2.90899e-147	1.42531e-159
PPTG_21384		0	6.05602	7.32209	8.6059	8.86727	6.41112e-12	1.27862e-12
PPTG_08752		4.5363	57.271	64.3677	3.6666	3.81764	7.22731e-88	5.72574e-96
PPTG_21762		0.796582	23.3827	25.5754	4.88757	5.00504	6.31609e-53	1.1494e-55
PPTG_04119		3.19736	34.7946	34.528	3.40182	3.37415	8.4109e-72	8.0314e-71
PPTG_16294		38.7974	0.0489335	0.0265881	-9.56468	-10.5403	2.47231e-19	8.15061e-18
PPTG_21019		1.27228	19.7748	20.7322	4.00362	4.05812	3.12786e-34	2.83293e-35
PPTG_13928		1.87014	38.2021	36.5288	4.3502	4.26683	3.38137e-69	1.25705e-66
PPTG_00372		101.374	14.0614	15.1414	-2.85146	-2.76243	3.20775e-122	2.87581e-118
PPTG_14890		0.715675	5.63918	4.10049	3.01205	2.54355	2.20128e-12	5.6681e-09
PPTG_11094		0.0301971	11.2125	9.91597	8.10646	7.91619	9.9848e-11	2.78278e-10
PPTG_07726		0.0436961	1.83965	1.32537	5.12718	4.62861	3.98892e-05	0.000254891
PPTG_24423		1.8342	66.5612	63.6791	5.28244	5.20231	2.79995e-66	2.48603e-64
PPTG_06623		2.64575	58.4908	61.8263	4.37774	4.44053	6.74756e-78	2.05758e-80
PPTG_06350		1.20349	11.3321	10.6724	3.25655	3.15811	1.17079e-22	2.27566e-21
PPTG_13244		2.27588	24.1814	25.5085	3.44043	3.49627	1.88807e-37	7.7219e-39
PPTG_08788		27.4558	2.92566	3.19963	-3.21199	-3.12402	9.58833e-27	2.50305e-26
PPTG_02453		50.3989	0.807074	0.756654	-5.86854	-6.07702	1.86695e-50	4.37165e-51
PPTG_23460		2.68867	22.3317	22.3112	3.02887	3.01564	5.05539e-26	6.83405e-26
PPTG_11709		15.1272	0.39187	0.350128	-5.27892	-5.45736	0	0
PPTG_13328		0.221609	29.8218	33.3416	6.98078	7.12091	2.36805e-24	2.41845e-25
PPTG_24742		1.30162	11.1357	12.4236	3.11214	3.24409	3.43297e-13	2.26084e-14
PPTG_18117		6.26922	44.6031	45.6025	2.8195	2.83293	2.343e-60	3.16982e-61
PPTG_10549		1.16748	9.44005	8.58226	3.00613	2.8479	9.05066e-13	1.54845e-11
PPTG_23118		11.0396	0	0.16254	-8.52396	-6.16341	1.01875e-10	4.73136e-10
PPTG_08229		39.7478	4.64117	4.78283	-3.1055	-3.07869	5.99131e-19	7.21135e-19
PPTG_00013		0.0187808	17.9195	19.1998	9.47422	9.55642	1.46494e-14	8.14112e-15
PPTG_14929		10.0208	0.0803276	0.184528	-7.02085	-5.78979	8.74355e-10	1.92893e-13
PPTG_23574		0.549595	8.26468	9.64477	4.00012	4.21066	5.77868e-14	1.67303e-15
PPTG_19260		6.72583	57.8263	58.3525	3.13125	3.12545	1.34913e-61	1.38891e-61
PPTG_20431		8.45031	1.18962	0.649867	-2.80889	-3.71407	5.73842e-09	2.12332e-12
PPTG_03030		9.96501	71.7586	71.7362	2.82899	2.81256	4.88314e-139	7.07327e-138
PPTG_11593		5.96221	27.6726	27.0071	2.20848	2.15614	1.06542e-33	3.11447e-32
PPTG_19758		5.11914	72.6615	74.0917	3.83169	3.84195	7.36313e-105	1.08184e-105
PPTG_00012		0.0209647	7.32164	7.56513	8.02734	8.05643	1.85811e-10	1.54224e-10
PPTG_14926		9.01444	1.60618	0.21126	-2.47112	-5.45041	0.00014964	7.8538e-10
PPTG_22384		6.1096	32.9109	32.7927	2.43958	2.41966	8.65578e-46	3.41071e-45
PPTG_18459		4.95501	28.1072	32.096	2.54308	2.71721	2.9717e-26	3.47283e-30
PPTG_16295		24.6531	0.0230952	0	-10.014	-11.0659	4.64406e-16	2.03059e-19
PPTG_09741		9.70991	46.3203	43.8636	2.25865	2.16074	5.45381e-56	2.64559e-51
PPTG_24909		0	2.50028	2.97345	6.49862	6.73172	1.49711e-06	5.29129e-07
PPTG_06400		11.8509	97.5048	106.723	3.04607	3.15931	1.6044e-176	3.46271e-191
PPTG_14259		0.935628	26.0107	20.6258	4.82736	4.48526	8.22349e-24	1.2635e-20
PPTG_19593		0	0.930087	0.765955	5.59201	5.30221	0.00120283	0.00230998
PPTG_06324		1.5974	23.1638	22.3587	3.84649	3.77817	4.99448e-46	1.78181e-44
PPTG_19553		9.8276	1.26529	1.48558	-2.97095	-2.7518	1.76002e-25	5.04101e-24
PPTG_00596		27.4817	4.13819	5.64259	-2.74673	-2.31769	7.0025e-25	1.90878e-19
PPTG_24869		14.2465	0.375429	0.284515	-5.27284	-5.59543	5.03017e-15	4.62635e-15
PPTG_17827		11.0451	50.1683	52.585	2.16959	2.22174	3.34058e-21	3.01655e-22
PPTG_14308		1.59767	0	0.0233668	-6.9856	-6.11386	2.40116e-06	4.49583e-05
PPTG_17293		0.0855905	13.1842	16.0994	7.29636	7.56888	2.43818e-16	1.51605e-17
PPTG_06227		10.8777	60.1517	57.3067	2.47379	2.3869	1.4015e-71	9.96798e-67
PPTG_16082		4.96035	28.7226	34.0287	2.47367	2.69997	4.13325e-20	5.01907e-24
PPTG_14936		10.5476	2.85975	1.96709	-1.88356	-2.45212	4.77654e-09	3.01424e-13
PPTG_13293		84.9915	4.95798	5.26427	-4.12118	-4.02766	5.57813e-102	1.38682e-103
PPTG_21678		19.9468	143.614	160.252	2.83313	2.97403	4.97686e-139	1.87569e-154
PPTG_04959		87.4628	3.31855	5.03284	-4.73404	-4.15291	1.5558e-138	3.67459e-139
PPTG_06969		0.786925	142.044	143.729	7.35014	7.35198	8.8233e-121	6.61409e-121
PPTG_23634		29.0726	2.09923	1.67642	-3.78396	-4.13995	3.7415e-30	1.0736e-32
PPTG_02251		147.527	8.94003	11.0305	-4.04538	-3.75719	6.30269e-167	1.20183e-157
PPTG_23062		60.6857	7.57533	7.68317	-2.99335	-2.99606	8.78135e-62	4.1318e-63
PPTG_02513		0.628496	103.937	104.002	7.23662	7.2229	1.85332e-122	4.58286e-122
PPTG_24069		5.20141	28.3664	31.9178	2.47806	2.63151	2.06086e-25	7.59746e-29
PPTG_20693		38.3578	174.768	178.594	2.18444	2.20005	6.155e-126	3.20189e-128
PPTG_19597		0.580402	34.7505	35.5381	5.88093	5.89681	8.16583e-64	3.10954e-64
PPTG_08686		24.0834	3.85954	4.11859	-2.64855	-2.5761	3.67982e-19	9.29571e-19
PPTG_20417		3.01985	11.829	9.05885	2.00735	1.60058	4.36582e-12	6.49885e-08
PPTG_16359		3.24565	14.0632	13.2189	2.0797	1.96759	1.73952e-13	3.5592e-12
PPTG_08605		3.57982	31.8366	29.7859	3.17144	3.05609	4.57109e-29	4.79051e-27
PPTG_13295		123.582	12.0121	12.0578	-3.37316	-3.38053	4.08037e-126	1.34516e-128
PPTG_05076		6.72096	128.483	136.416	4.26606	4.33647	1.90172e-170	1.47977e-176
PPTG_21846		15.9886	63.2471	66.0065	1.99341	2.03616	9.21569e-57	1.42551e-59
PPTG_06927		199.629	7.79091	11.024	-4.69328	-4.20111	1.5585e-229	2.42533e-224
PPTG_13571		1.62682	0.0254962	0.0244698	-5.95778	-6.04783	0.00011453	8.7344e-05
PPTG_17297		0.437822	1.95619	2.02457	2.19583	2.22369	0.000855897	0.000680574
PPTG_19834		1.2256	4.84719	5.73966	1.98346	2.21822	7.23523e-07	1.66985e-08
PPTG_04074		15.2512	53.6138	54.8211	1.81379	1.82931	1.228e-46	9.44308e-48
PPTG_12971		86.1294	13.4758	13.5581	-2.677	-2.68717	4.01311e-87	4.2235e-89
PPTG_23930		16.1802	0.0692152	1.14457	-7.87775	-3.83056	1.59834e-10	1.14667e-08
PPTG_23220		44.7774	8.96118	8.41257	-2.32141	-2.4422	1.00345e-48	1.78434e-53
PPTG_21593		185.451	58.8298	53.6129	-1.65924	-1.81314	5.44947e-63	1.18602e-74
PPTG_21845		12.831	47.5874	53.1139	1.90347	2.04118	5.3864e-22	2.29342e-25
PPTG_13926		6.16217	55.457	60.8975	3.18684	3.30679	8.02e-52	4.3264e-56
PPTG_13294		189.698	15.0341	14.746	-3.67324	-3.71005	1.63494e-167	2.4978e-173
PPTG_02929		19.2776	4.29939	3.96475	-2.16715	-2.29357	1.30502e-13	4.82941e-15
PPTG_21234		7.70238	51.013	50.2237	2.72785	2.69007	2.37868e-42	2.72341e-41
PPTG_12580		0	4.33076	3.46191	7.39615	7.05742	3.47078e-08	1.57571e-07
PPTG_21254		6.79746	18.7443	17.9767	1.45086	1.37454	4.45353e-26	1.53645e-23
PPTG_20700		0	1.77679	1.43486	6.05649	5.73962	3.2804e-05	9.368e-05
PPTG_23901		2.60451	40.1643	44.7309	3.88724	4.02767	1.33866e-65	8.72657e-71
PPTG_22782		3.49468	14.1392	13.849	1.99593	1.9413	1.01721e-15	5.81785e-15
PPTG_19442		0	1.18879	1.4393	6.18955	6.44446	1.66128e-05	6.27274e-06
PPTG_23820		7.89886	24.2989	25.2912	1.6204	1.65895	3.63118e-19	3.29372e-20
PPTG_11499		6.46772	19.8251	20.4305	1.62691	1.65	1.05377e-24	1.38617e-25
PPTG_09740		5.27907	44.8262	42.1125	3.11734	3.01067	5.38374e-63	8.34144e-59
PPTG_07589		0.0847891	22.4474	25.0055	8.33417	8.47301	5.51999e-15	1.77139e-15
PPTG_02930		15.0345	4.01907	3.00874	-1.91388	-2.34673	8.94924e-10	2.64229e-13
PPTG_05562		2.48507	6.14581	7.09371	1.26473	1.45309	0.00102242	0.000102314
PPTG_20228		12.8978	3.32945	2.834	-1.96908	-2.20409	2.95189e-07	1.05931e-08
PPTG_09734		12.9411	75.8278	78.9302	2.53203	2.57266	2.85246e-79	2.59105e-82
PPTG_18522		1.12633	0	0	-5.39614	-5.48619	0.0260545	0.0225792
PPTG_14927		2.22247	0	0	-7.10512	-7.19517	1.60377e-06	1.13132e-06
PPTG_08656		11.9127	63.0038	68.1697	2.40476	2.50386	1.36296e-50	3.74898e-55
PPTG_18339		28.9387	6.32984	7.72134	-2.18214	-1.9238	3.46405e-24	2.36657e-20
PPTG_14931		7.00939	1.73202	1.21756	-2.00606	-2.53163	9.65269e-07	1.75596e-09
PPTG_10127		6.75725	0.0875852	0.064947	-6.45278	-6.57333	1.38183e-11	8.68019e-12
PPTG_12969		10.6352	2.41974	3.04616	-2.12776	-1.8268	1.69033e-12	4.16499e-10
PPTG_01528		10.6464	0.696089	0.533442	-3.95786	-4.365	2.24615e-15	9.22145e-17
PPTG_11431		52.9002	21.1028	22.0442	-1.33183	-1.28551	4.27821e-24	8.31635e-23
PPTG_22361		1.43128	40.1456	39.6995	4.80493	4.77456	1.59479e-53	6.28238e-53
PPTG_19816		19.4095	0.0832232	0	-7.93161	-9.87174	5.28779e-13	3.32416e-15
PPTG_00351		30.3104	91.3316	83.522	1.57856	1.43421	1.15237e-36	2.14208e-30
PPTG_01855		8.78818	1.26838	1.54482	-2.77921	-2.52941	8.43336e-16	2.2824e-14
PPTG_24743		1.62467	3.97982	5.16075	1.3528	1.71133	0.0303042	0.00390451
PPTG_05884		2.01254	9.66847	12.0954	2.28005	2.58957	7.36412e-10	1.06409e-12
PPTG_19835		1.66147	5.72176	5.47653	1.79288	1.71254	1.06862e-08	4.93258e-08
PPTG_16292		62.3764	0	0.286524	-12.6634	-7.82143	1.75087e-05	0.00538959
PPTG_08446		8.49547	33.351	33.4313	1.97892	1.96786	1.7407e-35	2.768e-35
PPTG_02686		23.4476	49.037	50.4322	1.06466	1.08978	6.77825e-18	7.72691e-19
PPTG_00371		1.89053	0.288658	0.30572	-2.71223	-2.65936	0.000341214	0.000341839
PPTG_11208		16.6206	0	0	-10.1361	-10.2262	3.41265e-16	1.78683e-16
PPTG_23913		5.78532	41.2703	43.4955	2.81442	2.8738	2.31692e-42	2.68707e-44
PPTG_12320		0.0634448	1.76426	2.35941	4.95854	5.35761	0.00106757	0.000331231
PPTG_20477		3.60071	16.9396	17.8699	2.22841	2.29117	7.498e-24	2.17117e-25
PPTG_24481		3.38966	9.79051	10.0083	1.55946	1.57551	7.9984e-08	5.11117e-08
PPTG_15772		3.62607	12.1303	12.153	1.7423	1.72754	2.70808e-15	3.81696e-15
PPTG_08265		0.552764	11.2661	13.0045	4.35983	4.55235	7.11608e-20	1.07321e-21
PPTG_23044		3.60289	26.0296	28.3322	2.84706	2.9504	2.44358e-69	6.68592e-75
PPTG_17759		3.44077	11.6283	11.0888	1.747	1.66471	3.20977e-08	1.45705e-07
PPTG_11601		11.5405	34.0386	35.2343	1.55747	1.59023	3.24652e-24	2.09789e-25
PPTG_08485		9.96783	1.73106	1.06417	-2.53288	-3.24512	2.31462e-19	2.88723e-26
PPTG_14619		0	4.79498	4.52508	8.15586	8.05089	1.31716e-10	2.26677e-10
PPTG_21821		4.52488	10.6497	14.718	1.23661	1.68389	2.50289e-05	1.69716e-09
PPTG_08709		16.0586	5.61674	6.39752	-1.52296	-1.35549	8.0059e-09	1.66562e-07
PPTG_24327		24.5652	5.59576	7.12097	-2.12779	-1.81338	2.38001e-16	3.66436e-13
PPTG_01856		24.4174	5.73081	5.01762	-2.09239	-2.29983	2.26605e-11	1.93715e-13
PPTG_05066		8.37921	24.7843	24.4055	1.55568	1.5127	2.31277e-15	1.26553e-14
PPTG_23738		9.71073	3.01016	3.18337	-1.68789	-1.62387	2.88387e-06	5.14983e-06
PPTG_10134		23.1516	3.56397	4.16548	-2.69931	-2.49958	1.84664e-34	1.98518e-31
PPTG_06120		6.049	13.2183	16.2183	1.1248	1.39978	2.10872e-06	1.04521e-09
PPTG_03450		2.36661	25.7361	24.6378	3.45988	3.37318	3.14244e-32	1.07207e-30
PPTG_22947		0.0432356	44.2182	43.8689	9.81846	9.79126	2.48168e-30	3.5337e-30
PPTG_06026		3.91734	0	0.0283668	-7.99794	-7.1262	3.67642e-09	1.76622e-07
PPTG_21564		2.17406	16.1857	19.424	2.90251	3.13886	2.48379e-24	1.14552e-28
PPTG_05417		3.71291	0	0	-8.17555	-8.2656	1.2682e-09	7.96068e-10
PPTG_18013		15.7005	41.4868	42.8575	1.38333	1.412	4.00443e-33	8.84424e-35
PPTG_06899		3.10409	6.3508	7.38861	1.02476	1.22532	4.3301e-06	1.80907e-08
PPTG_09872		0	0.404277	0.293248	4.84521	4.37381	0.00704723	0.0172038
PPTG_19555		28.1733	0.0272407	0.020802	-10.0209	-10.3701	7.04783e-62	1.61229e-55
PPTG_10179		11.2529	29.0172	30.1735	1.37643	1.41948	3.88743e-11	7.18126e-12
PPTG_17760		4.03417	10.5931	10.2993	1.38175	1.32649	7.75627e-07	2.14637e-06
PPTG_24966		0.160287	36.492	35.969	8.03505	8.00167	2.42422e-20	3.40436e-20
PPTG_05448		66.2153	25.7567	28.2239	-1.37286	-1.25412	6.82791e-29	5.75411e-25
PPTG_03664		15.8547	34.4866	34.5638	1.11025	1.09545	2.26793e-17	5.07024e-17
PPTG_13527		7.67001	20.1542	21.139	1.39525	1.44531	1.7631e-15	1.08064e-16
PPTG_20214		8.07783	3.63197	3.40664	-1.15724	-1.26029	0.00357893	0.00133156
PPTG_11191		11.7616	26.1295	25.5153	1.14832	1.096	1.68456e-08	7.45082e-08
PPTG_22554		0.450241	0	0	-5.11514	-5.2052	0.0418959	0.0367827
PPTG_23332		25	0.728568	0.696858	-5.15052	-5.18218	2.72303e-73	5.39139e-76
PPTG_03486		44.366	11.1144	13.6974	-2.00262	-1.72281	9.82691e-34	1.55681e-26
PPTG_22068		8.29251	25.5847	24.9162	1.62561	1.57264	6.90755e-30	4.28512e-28
PPTG_14232		0	0.865055	0.955782	5.28747	5.41152	0.00106277	0.000738111
PPTG_19101		2.03988	0.147484	0.0710392	-3.80234	-4.88422	1.09319e-05	4.46021e-06
PPTG_16266		3.84316	56.3938	57.3255	3.87766	3.88872	4.85909e-66	1.62689e-66
PPTG_17121		44.7364	7.25452	8.5016	-2.62323	-2.41717	2.06743e-39	3.17295e-35
PPTG_14192		14.7624	4.91198	5.12562	-1.58221	-1.55484	3.533e-09	4.69875e-09
PPTG_03162		19.9472	73.0858	77.5493	1.87652	1.94186	2.46036e-67	1.16377e-72
PPTG_19089		5.23288	13.1507	12.9267	1.34378	1.30085	6.97494e-07	1.55856e-06
PPTG_23811		7.23232	0.361767	0.246738	-4.33787	-4.83308	4.53953e-13	5.69329e-14
PPTG_02015		6.62791	2.33003	2.91072	-1.50008	-1.22144	0.00254525	0.0144346
PPTG_18499		28.02	6.37915	7.31302	-2.14736	-1.96923	1.19146e-23	2.94769e-21
PPTG_16853		0	8.37777	9.08065	9.40346	9.50656	3.83605e-14	1.87816e-14
PPTG_15474		0.498814	4.06425	4.94047	3.00835	3.27035	1.04737e-11	7.62462e-14
PPTG_12803		0.862874	2.96815	3.31048	1.78186	1.91488	9.61386e-07	9.32173e-08
PPTG_22374		45.98	22.0715	15.8279	-1.06169	-1.56121	7.64571e-07	3.06316e-13
PPTG_11787		0.214118	4.74125	5.3368	4.44519	4.59101	6.80215e-07	2.47374e-07
PPTG_14620		0	4.94096	4.60076	7.47084	7.36089	9.95506e-09	1.64189e-08
PPTG_19210		58.5208	17.0904	15.8743	-1.79508	-1.90541	4.69134e-22	1.10405e-24
PPTG_14655		0.482033	19.1712	21.5818	5.28963	5.44585	3.15563e-27	6.80195e-29
PPTG_11168		28.8324	89.6937	85.5792	1.61683	1.53427	1.01256e-53	1.72951e-48
PPTG_20845		3.01869	6.43401	6.94532	1.08698	1.18102	0.00408144	0.00144129
PPTG_16485		2.63843	21.5577	16.5212	3.03767	2.63977	3.54984e-29	5.48373e-22
PPTG_01088		6.65431	16.8747	14.4838	1.31671	1.0775	2.92876e-07	4.077e-05
PPTG_16180		0.537803	76.9795	81.7394	7.07533	7.14545	1.80703e-101	1.44458e-103
PPTG_06399		14.9364	34.5983	38.2666	1.20833	1.33813	6.9536e-17	9.20579e-21
PPTG_10701		12.1938	26.3639	26.2923	1.10496	1.08334	1.61834e-15	4.82941e-15
PPTG_24570		0.322262	1.63142	1.48906	2.26164	2.10837	7.78872e-05	0.000261429
PPTG_11392		0.495813	39.6046	31.9773	6.35055	6.04239	5.83735e-05	0.000141054
PPTG_09878		0.144924	1.24009	1.14697	3.264	3.14962	0.00325446	0.00463844
PPTG_22576		10.0882	22.6763	22.4845	1.1551	1.1268	1.24847e-13	4.18748e-13
PPTG_23914		0.649053	4.93609	5.48613	2.89732	3.04679	1.04326e-05	2.81734e-06
PPTG_25045		16.445	42.0952	42.3776	1.34799	1.34239	1.36173e-19	1.45826e-19
PPTG_06836		0.988544	70.4645	71.6892	6.17223	6.18281	1.23598e-136	3.43711e-137
PPTG_23651		7.03916	1.6035	2.47891	-2.17202	-1.54255	0.00034392	0.0102032
PPTG_11788		0.118363	0.987877	1.10668	2.98173	3.12106	0.00116668	0.000585107
PPTG_19865		33.9597	12.9813	15.7802	-1.38845	-1.12983	1.33726e-18	4.20846e-13
PPTG_18826		21.2263	48.5528	50.5834	1.18732	1.22939	9.54661e-20	2.9799e-21
PPTG_09190		2.13143	10.0379	10.073	2.25691	2.2456	4.9123e-12	5.5751e-12
PPTG_09536		171.564	58.3999	70.9156	-1.56031	-1.30019	7.1528e-76	1.09303e-54
PPTG_20246		14.6951	95.3099	101.997	2.67498	2.75786	2.96508e-56	6.22461e-60
PPTG_16225		0.118635	3.04227	3.68499	4.71505	4.98181	0.000118306	4.0193e-05
PPTG_17853		2.52251	41.9591	44.9418	4.02473	4.10472	5.2867e-100	1.77114e-104
PPTG_15169		0	0.374753	0.301683	4.48002	4.14782	0.0147086	0.0257977
PPTG_24175		0.113333	0.529648	0.499496	2.33198	2.22456	0.00118796	0.00209267
PPTG_24128		6.11	34.5846	36.4727	2.50048	2.55792	1.26581e-34	2.13715e-36
PPTG_20717		24.7494	10.4098	10.6622	-1.25682	-1.24207	1.30182e-10	1.51228e-10
PPTG_08006		0.462551	4.7152	5.00157	3.33557	3.41046	6.9879e-11	2.14347e-11
PPTG_23781		37.1924	90.0873	88.6689	1.27173	1.23704	5.22961e-09	1.35856e-08
PPTG_12316		0.97795	0.144311	0.0595962	-2.85695	-4.02377	0.0369252	0.0104345
PPTG_10367		73.8589	12.55	13.6449	-2.55174	-2.45486	3.25771e-46	5.4273e-44
PPTG_18763		0.258155	1.73827	2.05438	2.63527	2.86079	9.12203e-05	1.59977e-05
PPTG_07017		75.7965	36.1136	37.4693	-1.0758	-1.04179	2.36987e-35	8.10311e-34
PPTG_09737		0.28429	2.704	2.85326	3.22884	3.2918	1.4911e-07	7.52559e-08
PPTG_17137		5.44191	0.228289	0.266359	-4.55828	-4.37477	7.83135e-08	4.41919e-08
PPTG_18357		0.314882	15.0581	3.70338	5.57029	3.53271	7.93326e-13	1.09237e-05
PPTG_19128		0.422996	2.518	2.1354	2.56548	2.32725	0.000174438	0.000785677
PPTG_14502		2.75756	0.338201	0.414907	-2.97932	-2.76241	3.64979e-05	8.27927e-05
PPTG_03489		0.714733	4.05037	4.64382	2.51225	2.69688	3.38689e-07	2.99031e-08
PPTG_06021		2.53025	0.19215	0.233133	-3.70641	-3.5259	8.06587e-05	9.42835e-05
PPTG_12681		0.0787634	0.546508	0.76015	2.83002	3.27067	0.0040023	0.000612831
PPTG_06270		42.9849	97.3922	90.4028	1.16865	1.04789	1.55394e-10	1.15288e-08
PPTG_09251		1.37157	0.211984	0.222637	-2.68202	-2.69468	0.00394611	0.00344619
PPTG_17688		0.345527	1.75887	1.51582	2.32546	2.09308	6.47023e-05	0.000399552
PPTG_12319		2.96769	8.16122	8.76171	1.46723	1.54799	4.58124e-09	4.08226e-10
PPTG_20283		1.07197	4.80918	4.54875	2.1814	2.07696	6.85934e-06	2.00027e-05
PPTG_17884		2.1774	0.870249	0.686253	-1.34581	-1.68028	0.0257386	0.00466171
PPTG_13804		9.81059	27.9354	31.0047	1.5078	1.64221	3.31524e-19	7.46511e-23
PPTG_18545		18.7594	4.34119	4.36447	-2.10764	-2.11922	1.2182e-19	3.88921e-20
PPTG_23287		4.8153	1.5752	1.52277	-1.62868	-1.68236	0.00109988	0.000667818
PPTG_00720		11.993	4.82973	4.6621	-1.31764	-1.38517	1.71326e-09	1.96144e-10
PPTG_21287		15.8834	32.5907	34.6137	1.02382	1.0937	1.16305e-14	7.73577e-17
PPTG_05625		5.16093	10.6411	10.6655	1.01711	1.00254	1.12931e-05	1.43651e-05
PPTG_21738		100.877	50.5947	50.7985	-1.00562	-1.01434	8.72842e-23	2.36696e-23
PPTG_18487		1099.25	2246.39	2236.94	1.02189	1.00007	2.39281e-69	1.62689e-66
PPTG_12666		1.68534	3.40172	3.38594	1.02664	1.00807	0.0403444	0.0433016
PPTG_21331		89.5828	44.8649	44.2832	-1.00243	-1.03983	1.09662e-14	7.91791e-16
PPTG_20233		14.8164	30.4748	31.0415	1.01581	1.02809	1.19109e-08	6.76971e-09
PPTG_19012		31.8445	16.0967	15.8229	-1.00401	-1.04398	7.89043e-08	2.00045e-08
PPTG_12081		54.72	112.279	112.415	1.03132	1.01733	2.06029e-27	9.90569e-27
PPTG_16741		11.6619	23.8939	24.114	1.03159	1.02873	1.25985e-07	1.22436e-07
PPTG_15895		256.762	125.106	128.219	-1.0417	-1.02418	8.07259e-45	9.01018e-44
PPTG_00143		23.0851	11.0742	11.6354	-1.05812	-1.00962	5.11565e-09	1.83346e-08
PPTG_20331		215.265	104.331	108.245	-1.05208	-1.01549	4.84422e-24	1.30418e-22
PPTG_01186		49.0981	99.5321	104.829	1.00669	1.06268	1.37791e-17	1.15484e-19
PPTG_15896		25.7519	12.6642	12.759	-1.03029	-1.03887	4.9322e-23	1.18142e-23
PPTG_11561		14.3497	29.936	29.3147	1.06103	1.01043	2.2571e-09	1.25942e-08
PPTG_15314		4.56458	9.29596	9.47905	1.03031	1.0416	0.00338117	0.00284976
PPTG_17047		8.55752	18.2349	17.7764	1.06616	1.0081	1.91228e-05	5.62609e-05
PPTG_18054		118.695	59.2749	57.7653	-1.01171	-1.06738	4.61654e-22	1.52043e-24
PPTG_14968		13.5764	6.53969	6.78748	-1.06313	-1.02027	4.29784e-06	8.46486e-06
PPTG_05520		134.545	279.588	281.38	1.0486	1.04123	7.31759e-34	1.65866e-33
PPTG_15737		177.217	367.629	374.206	1.04022	1.04998	4.96345e-23	1.74735e-23
PPTG_00642		38.1008	18.9492	18.3579	-1.01562	-1.07681	4.19235e-09	3.70957e-10
PPTG_15881		7.87863	16.6033	16.4082	1.06605	1.03239	9.04835e-08	2.20593e-07
PPTG_21510		35.7221	16.9812	17.8041	-1.07508	-1.02378	1.29702e-07	4.319e-07
PPTG_05521		90.1824	188.71	190.205	1.05329	1.04969	3.73339e-40	3.88966e-40
PPTG_15741		62.9391	131.617	133.718	1.04965	1.05595	1.25594e-27	4.9329e-28
PPTG_15736		108.005	226.474	228.419	1.05493	1.05118	2.03431e-22	2.62485e-22
PPTG_19989		593.994	294.356	282.593	-1.01716	-1.09435	2.40526e-34	1.19155e-39
PPTG_20028		17.8417	36.3189	38.4191	1.02646	1.08513	3.65106e-09	3.20355e-10
PPTG_20078		7.82569	16.9174	15.9322	1.11443	1.00162	2.29074e-05	0.000165918
PPTG_14832		62.91	29.1832	31.9025	-1.11525	-1.00143	7.15667e-17	5.83091e-14
PPTG_06261		0.589381	1.19735	1.31321	1.00236	1.11424	0.00522555	0.00144613
PPTG_16663		37.8644	17.7768	19.1587	-1.10319	-1.01763	6.59166e-09	7.78003e-08
PPTG_12972		185.176	87.8867	91.3125	-1.08012	-1.03941	1.2228e-28	7.4108e-27
PPTG_15636		63.5072	31.4912	30.1968	-1.02248	-1.09982	1.87765e-27	1.09029e-31
PPTG_22108		105.453	50.8351	51.3783	-1.06372	-1.06241	4.60887e-18	3.30322e-18
PPTG_15872		130.899	63.4587	62.9294	-1.05044	-1.07733	6.82384e-33	8.55596e-35
PPTG_21177		113.666	57.1317	52.7747	-1.001	-1.13081	5.74518e-24	2.87e-30
PPTG_22644		39.5285	85.6757	81.4337	1.11216	1.02184	9.06914e-14	8.67431e-12
PPTG_22643		44.2877	95.8432	91.7824	1.10938	1.03018	3.19356e-14	2.03342e-12
PPTG_04411		51.4132	25.0485	24.6641	-1.05039	-1.08825	5.67754e-19	1.83892e-20
PPTG_09893		89.0864	42.6788	43.2226	-1.07012	-1.06959	7.95089e-18	5.90028e-18
PPTG_00462		181.296	87.9237	86.6493	-1.05252	-1.08858	3.20328e-14	3.363e-15
PPTG_03877		12.1473	6.00299	5.6138	-1.01156	-1.13295	0.000105949	1.15164e-05
PPTG_07947		7.28694	14.652	16.3559	1.00247	1.14352	6.56027e-11	4.46901e-14
PPTG_21974		46.944	100.34	98.7761	1.09233	1.05098	2.87281e-36	8.41625e-34
PPTG_12091		16.7921	8.34281	7.72897	-1.0119	-1.13687	2.06779e-06	7.99603e-08
PPTG_19281		46.5276	97.2766	100.157	1.06501	1.08893	3.23795e-24	1.81603e-25
PPTG_06645		22.9637	10.751	11.2557	-1.1048	-1.05091	8.55761e-11	4.54478e-10
PPTG_01875		7.23274	3.31265	3.56701	-1.11628	-1.04222	0.00216421	0.00393146
PPTG_12756		6.07154	12.6525	13.0163	1.0687	1.08886	1.1661e-08	5.11993e-09
PPTG_21514		56.745	120.918	121.499	1.08336	1.07557	1.68219e-16	2.48858e-16
PPTG_03588		134.83	63.3132	65.3499	-1.09576	-1.0646	5.24039e-40	2.13538e-38
PPTG_09611		116.031	246.812	249.788	1.08289	1.08301	9.38009e-45	6.27037e-45
PPTG_01187		19.991	40.8772	44.4499	1.03272	1.1357	1.41827e-13	2.04707e-16
PPTG_24352		14.9576	7.21178	7.06197	-1.05839	-1.10841	1.56895e-07	3.26858e-08
PPTG_19270		2.80522	6.11985	5.92543	1.11251	1.05467	0.00359626	0.0059363
PPTG_15829		30.1266	61.4037	67.9055	1.02298	1.14862	2.68986e-14	5.08714e-18
PPTG_15746		165.667	354.069	359.836	1.08134	1.08842	8.20505e-25	3.43375e-25
PPTG_20084		13.9893	6.4922	6.69035	-1.09674	-1.07549	9.95706e-05	0.000122415
PPTG_08118		249.111	115.878	121.442	-1.1146	-1.06423	1.37542e-45	4.80576e-42
PPTG_12722		52.1618	107.948	115.953	1.04787	1.1347	2.67638e-14	1.1083e-16
PPTG_24528		19.1078	8.46327	9.69177	-1.18023	-1.00827	7.85906e-08	3.50438e-06
PPTG_03393		26.2581	53.0475	59.4519	1.02076	1.16638	3.82779e-11	2.14337e-14
PPTG_11948		208.593	96.2454	101.108	-1.11919	-1.06719	4.21459e-33	1.85081e-30
PPTG_12069		1.55581	3.25623	3.47896	1.04789	1.14005	0.0251721	0.0125936
PPTG_05631		22.4521	10.2126	11.1623	-1.14827	-1.04173	1.15403e-08	1.62443e-07
PPTG_06204		3.27115	1.55126	1.49285	-1.05141	-1.13878	0.0421522	0.0249147
PPTG_22532		59.6217	120.554	137.735	1.01119	1.18591	2.96105e-11	3.15612e-15
PPTG_00676		23.7006	49.7135	52.3794	1.06657	1.12461	2.70831e-25	2.66901e-28
PPTG_19362		27.0793	58.5788	58.5865	1.10353	1.08751	1.74256e-27	6.83054e-27
PPTG_02933		11.2983	5.59249	5.02733	-1.01218	-1.18651	0.000528661	3.97018e-05
PPTG_14363		1.49515	3.17944	3.29065	1.07927	1.11478	0.00118451	0.000720152
PPTG_11174		21.9955	10.7638	9.98266	-1.03036	-1.16905	8.229e-06	3.45939e-07
PPTG_15471		22.3213	47.1567	48.9415	1.0817	1.11528	7.84784e-08	2.61583e-08
PPTG_11501		281.033	131.86	134.001	-1.10332	-1.09651	1.24185e-38	2.13516e-38
PPTG_21134		19.3467	42.0591	41.4189	1.11928	1.08189	2.71489e-13	1.51151e-12
PPTG_23055		11.2329	23.1513	25.8418	1.03264	1.17403	1.83245e-07	1.55747e-09
PPTG_24355		4.71056	10.2673	9.98862	1.1297	1.07549	0.00177598	0.00303419
PPTG_17537		13.4241	6.70542	5.98134	-1.02256	-1.18919	0.000343187	2.58385e-05
PPTG_20681		51.5403	116.448	107.632	1.17114	1.04105	4.08506e-18	1.6684e-14
PPTG_11517		184.806	85.4486	87.8759	-1.11625	-1.09612	1.60638e-63	5.07094e-62
PPTG_22753		4.0569	1.8168	2.00062	-1.16201	-1.05813	0.00448016	0.00947157
PPTG_20211		71.0087	34.4439	31.9886	-1.05364	-1.16879	6.76423e-11	3.55667e-13
PPTG_03108		12.5407	5.34369	6.30208	-1.231	-1.00107	1.76314e-05	0.000481546
PPTG_19324		15.872	33.1909	36.9027	1.04318	1.18234	4.3993e-09	1.46721e-11
PPTG_19211		80.2941	38.514	36.6054	-1.06844	-1.15485	3.63093e-21	1.32364e-24
PPTG_19087		6.96219	16.2989	14.5184	1.2084	1.02255	8.99061e-07	4.47939e-05
PPTG_15844		3.78039	8.16414	8.61909	1.08224	1.14185	0.000129178	4.25357e-05
PPTG_02411		136.904	65.213	62.8913	-1.07777	-1.14952	7.40597e-23	6.19183e-26
PPTG_21957		54.8756	119.259	121.32	1.11234	1.12302	2.49897e-15	1.13495e-15
PPTG_19818		65.0004	29.3148	31.0906	-1.14963	-1.08806	3.70193e-21	1.78151e-19
PPTG_02631		55.9895	26.3914	25.6743	-1.09186	-1.14737	2.4515e-45	3.5806e-50
PPTG_12839		10.6582	5.1878	4.69954	-1.04447	-1.2036	8.89747e-06	2.67097e-07
PPTG_12568		38.5718	86.963	83.1178	1.1633	1.08117	8.17204e-15	5.96195e-13
PPTG_24460		20.0187	9.48868	9.10415	-1.08515	-1.15953	2.97173e-06	4.93056e-07
PPTG_24230		334.477	155.555	154.931	-1.11083	-1.13302	6.8645e-22	8.43285e-23
PPTG_23439		582.925	266.643	274.978	-1.1364	-1.10886	2.22727e-53	3.80027e-51
PPTG_23113		58.7995	26.2163	28.5455	-1.17863	-1.07167	2.26971e-16	4.27688e-14
PPTG_16557		1.26477	2.57002	2.94576	1.03715	1.22022	0.028975	0.00754514
PPTG_09346		35.3643	16.2521	16.3919	-1.12413	-1.12799	6.40713e-14	4.01966e-14
PPTG_00726		5.13991	2.40862	2.3272	-1.08516	-1.16922	0.00919476	0.00444661
PPTG_09610		102.278	223.463	229.172	1.11666	1.13682	6.53373e-56	2.15505e-58
PPTG_22326		44.2124	21.1318	19.7514	-1.07157	-1.18569	3.38386e-14	3.79421e-17
PPTG_21025		13.0879	28.4655	29.3683	1.1113	1.14384	3.10088e-12	4.79933e-13
PPTG_24321		5.00173	2.32198	2.27837	-1.11453	-1.14139	0.0191721	0.0151448
PPTG_22233		8.5288	18.4376	19.513	1.09583	1.16091	7.97382e-13	2.13994e-14
PPTG_07945		12.7616	27.3707	29.0412	1.0975	1.16448	3.20721e-28	4.40749e-32
PPTG_02279		75.9707	35.4022	34.6069	-1.10746	-1.15653	6.35676e-18	1.62452e-19
PPTG_07581		24.4411	10.8951	11.5563	-1.16996	-1.09669	2.71736e-13	4.91927e-12
PPTG_17296		27.0878	60.3518	59.9919	1.14887	1.1226	1.58128e-15	6.12739e-15
PPTG_01400		14.3329	6.22777	7.07921	-1.22978	-1.04922	7.55824e-05	0.000720299
PPTG_06422		63.8576	29.5636	29.2896	-1.12363	-1.14895	7.5574e-18	9.20044e-19
PPTG_21697		16.567	37.6778	35.7524	1.18735	1.09189	2.2112e-10	6.12588e-09
PPTG_25016		12.865	5.56546	6.26582	-1.21428	-1.06895	0.000135123	0.0007277
PPTG_12797		17.9968	37.8213	42.1117	1.07153	1.21189	9.53387e-11	1.09972e-13
PPTG_24793		53.3446	23.3885	25.5665	-1.20213	-1.08464	1.38727e-10	5.62709e-09
PPTG_15577		68.9251	31.0591	32.0637	-1.15745	-1.12908	1.24101e-29	9.81942e-29
PPTG_08392		10.6432	4.73933	4.99475	-1.17752	-1.11041	1.42576e-09	8.29795e-09
PPTG_22717		46.1451	101.554	104.638	1.13024	1.15712	4.59133e-53	5.08266e-56
PPTG_15592		30.3222	67.9098	67.1199	1.16191	1.1271	2.39553e-42	4.77262e-40
PPTG_14967		14.1688	6.69004	6.36104	-1.09852	-1.1927	0.000318886	7.98798e-05
PPTG_19962		4.71544	10.0958	10.9766	1.09561	1.19903	0.000449321	8.95665e-05
PPTG_03790		127.43	57.7936	58.5685	-1.14938	-1.14419	1.57477e-39	1.02013e-39
PPTG_11158		6.75991	3.19892	2.99377	-1.09888	-1.1987	0.000265367	5.95187e-05
PPTG_03443		40.4679	88.9511	93.2233	1.12298	1.17316	4.64941e-23	3.28188e-25
PPTG_04426		29.7684	68.6028	65.1057	1.19367	1.1037	3.17812e-22	3.85498e-19
PPTG_01086		3.48828	8.09219	7.70821	1.19454	1.10394	0.000450818	0.00130211
PPTG_23112		37.5004	17.3964	17.0638	-1.12633	-1.17106	4.86507e-09	9.30537e-10
PPTG_21379		162.271	361.823	364.868	1.15156	1.14697	2.94205e-52	6.1671e-52
PPTG_11547		44.4414	20.8272	19.5877	-1.09807	-1.20309	5.59302e-17	3.54985e-20
PPTG_21900		4.05166	8.82941	9.19944	1.12888	1.17184	0.00145445	0.000836144
PPTG_18099		2.34612	1.0917	1.0096	-1.07933	-1.22612	0.0384129	0.0164472
PPTG_04518		17.4293	7.79531	8.01467	-1.16022	-1.14163	7.19977e-09	1.06282e-08
PPTG_21802		30.0146	13.4395	13.9181	-1.17204	-1.13175	6.15128e-09	1.53367e-08
PPTG_20937		126.988	57.493	58.0252	-1.15057	-1.15704	7.03889e-22	2.58301e-22
PPTG_19086		31.4301	13.5351	15.0593	-1.22291	-1.08955	1.79797e-08	4.29322e-07
PPTG_10548		23.3375	9.99456	11.2109	-1.23126	-1.08277	1.08411e-08	3.57677e-07
PPTG_17196		6.92911	3.43044	2.78569	-1.01281	-1.32582	0.000332795	2.21205e-06
PPTG_22358		20.1054	9.34144	8.93044	-1.11886	-1.20016	1.05338e-06	1.35529e-07
PPTG_06408		12.1881	5.78708	5.17834	-1.07438	-1.25011	6.05523e-05	2.38304e-06
PPTG_00164		11.8471	25.7574	27.5582	1.12073	1.20085	1.0562e-09	3.86447e-11
PPTG_12523		10.5601	24.5673	23.3671	1.20399	1.11887	7.7005e-11	1.63417e-09
PPTG_09612		17.1113	39.6736	37.5796	1.21083	1.1139	1.05379e-13	9.2988e-12
PPTG_23412		35.0693	15.5817	16.2057	-1.18213	-1.1413	5.99325e-26	1.49635e-24
PPTG_10712		607.232	282.006	267.418	-1.116	-1.20956	5.41983e-35	5.64379e-41
PPTG_14252		602.407	280.459	262.405	-1.10793	-1.22175	6.2318e-32	1.26889e-38
PPTG_05748		5.4883	2.31046	2.67893	-1.25609	-1.07951	0.00396426	0.0131112
PPTG_20438		11.4081	24.3581	27.9084	1.08	1.25637	9.85148e-10	4.64613e-13
PPTG_18491		263.104	115.058	122.072	-1.19927	-1.13234	2.2565e-31	3.18375e-28
PPTG_05126		83.2262	185.875	190.422	1.15924	1.17682	2.94557e-24	4.93779e-25
PPTG_23303		8.60036	19.4318	19.5407	1.17463	1.1657	3.04317e-08	3.40536e-08
PPTG_05908		660.831	306.107	285.655	-1.11513	-1.23253	4.61598e-33	3.49532e-40
PPTG_20846		10.8738	24.3334	25.4789	1.15144	1.19792	7.82502e-10	1.13605e-10
PPTG_12794		10.6873	23.6829	24.9356	1.14967	1.20286	1.02738e-16	2.04208e-18
PPTG_01853		6.30824	3.12309	2.48588	-1.014	-1.36427	0.008409	0.000335134
PPTG_18486		689.675	1588.55	1571.35	1.19217	1.16091	7.68233e-51	2.84553e-48
PPTG_08120		248.879	95.9094	126.485	-1.3811	-1.00244	1.14227e-65	3.39294e-36
PPTG_07567		39.0402	16.9657	18.0498	-1.2137	-1.14074	4.57921e-16	1.22548e-14
PPTG_22080		32.9847	77.3766	73.5625	1.22346	1.13531	1.99022e-24	3.51937e-21
PPTG_22300		12.9052	29.1226	29.8268	1.17195	1.19008	2.00754e-07	1.12179e-07
PPTG_23526		31.1272	14.4022	13.4263	-1.12543	-1.24254	1.53122e-06	9.2009e-08
PPTG_12398		56.6456	127.529	133.407	1.16428	1.21319	2.42359e-19	4.87292e-21
PPTG_03291		27.7783	11.2304	13.3683	-1.30572	-1.08317	2.58226e-10	1.17088e-07
PPTG_07609		3.41619	8.82565	7.28634	1.3429	1.05516	5.43186e-05	0.00218833
PPTG_20826		88.529	196.235	213.79	1.13707	1.24628	4.9442e-13	1.57823e-15
PPTG_01123		5.2106	12.1464	11.6759	1.23183	1.15393	5.33192e-06	2.20369e-05
PPTG_24942		39.3367	17.7326	17.2342	-1.16665	-1.21913	5.40305e-10	6.91088e-11
PPTG_21386		40.9718	94.2384	94.7235	1.19757	1.1877	8.91095e-33	1.85549e-32
PPTG_01808		12.936	30.6348	29.1421	1.24485	1.15079	5.342e-13	2.93277e-11
PPTG_17923		306.448	121.109	149.238	-1.34753	-1.06774	8.62741e-20	7.21105e-13
PPTG_20680		45.9155	109.261	104.11	1.24364	1.1573	4.39257e-19	1.16585e-16
PPTG_06323		7.32023	16.7396	17.0298	1.1979	1.20302	2.12279e-06	1.71915e-06
PPTG_24382		765.626	340.305	333.724	-1.17928	-1.22338	4.97553e-139	3.78885e-150
PPTG_11661		3.74952	8.37838	9.01599	1.15998	1.24748	2.83135e-09	9.74631e-11
PPTG_19866		46.4845	18.6782	22.0841	-1.3186	-1.10117	2.08873e-13	5.81282e-10
PPTG_00986		3.5875	7.92683	8.99999	1.12728	1.29065	0.0149753	0.00424962
PPTG_16482		154.834	69.0015	66.6085	-1.17421	-1.24204	3.07989e-36	1.44508e-40
PPTG_03243		6.62149	14.3396	16.9656	1.10185	1.32576	5.00218e-08	1.86787e-11
PPTG_21071		60.079	135.667	145.454	1.16701	1.25388	3.21912e-14	2.64267e-16
PPTG_20315		7.14863	17.3131	15.8972	1.28371	1.14066	5.54419e-12	1.21298e-09
PPTG_01120		1.78634	4.05675	4.45618	1.1543	1.27148	0.00599046	0.00195395
PPTG_20317		12.4198	28.1966	30.4297	1.16632	1.26046	1.49233e-12	9.91315e-15
PPTG_23435		79.0949	36.8275	32.2509	-1.11613	-1.32111	2.20126e-21	2.76405e-29
PPTG_10008		10.7056	24.9342	25.9655	1.19234	1.23707	5.34466e-08	1.29991e-08
PPTG_10809		16.9243	7.33971	7.39245	-1.209	-1.22105	9.53387e-11	4.2937e-11
PPTG_06023		3.55369	7.60181	9.14005	1.09923	1.3444	0.000213024	2.73808e-06
PPTG_17163		5.2494	12.0583	12.477	1.20246	1.23109	3.84028e-06	1.85429e-06
PPTG_20444		7.36201	17.9344	17.0601	1.26523	1.17031	1.69474e-10	3.93936e-09
PPTG_21945		30.1934	75.3455	66.8333	1.31535	1.12586	1.16404e-14	5.58874e-11
PPTG_17051		71.977	30.3478	32.4399	-1.2578	-1.17778	7.3185e-23	1.63347e-20
PPTG_17793		26.4424	10.7296	12.1655	-1.30504	-1.1381	1.40347e-13	6.66172e-11
PPTG_09196		2.41191	1.20466	0.91051	-1.02802	-1.44518	0.0359889	0.00257623
PPTG_18188		4.66107	10.4997	11.5297	1.16042	1.28373	0.000119022	1.50924e-05
PPTG_07434		112.377	47.0912	50.381	-1.26299	-1.18107	4.42881e-27	3.61525e-24
PPTG_24051		19.1043	8.64765	7.85863	-1.14899	-1.30161	1.42972e-07	2.22942e-09
PPTG_22904		46.5267	20.2974	19.8895	-1.19745	-1.25204	8.47762e-14	4.44564e-15
PPTG_18053		159.663	73.253	64.6687	-1.12908	-1.32861	1.87004e-42	1.2012e-57
PPTG_21511		34.4027	15.3315	14.3964	-1.17079	-1.28341	6.26274e-11	6.53266e-13
PPTG_08603		8.55043	4.14561	3.24554	-1.05473	-1.42777	2.81262e-06	2.87203e-10
PPTG_04548		33.4899	77.6365	80.2056	1.21359	1.24363	4.08878e-11	1.12894e-11
PPTG_13422		59.144	26.3865	24.528	-1.16699	-1.29373	1.86257e-31	2.40944e-38
PPTG_22504		367.353	847.748	893.578	1.19928	1.26066	5.60576e-23	2.59825e-25
PPTG_10957		0.870372	1.92538	2.14808	1.16231	1.30115	0.0104808	0.00318765
PPTG_22213		33.5071	14.2578	14.606	-1.24392	-1.22913	1.13278e-12	1.31495e-12
PPTG_06186		9.33185	3.61376	4.39373	-1.36653	-1.12	2.30269e-06	9.96695e-05
PPTG_00125		12.8905	29.0677	32.1477	1.17671	1.30629	4.52057e-10	2.44365e-12
PPTG_22718		40.9689	97.453	97.9226	1.24608	1.23517	1.47769e-55	9.04156e-55
PPTG_22502		2.66398	6.58863	6.09421	1.30785	1.18009	0.000556277	0.0021097
PPTG_14919		10.7368	4.25952	4.89615	-1.33588	-1.15562	3.00802e-07	8.55431e-06
PPTG_21722		6.07165	15.0993	14.1139	1.30101	1.18908	9.62494e-06	6.07494e-05
PPTG_21467		143.26	342.101	346.546	1.24965	1.25159	1.5067e-67	6.41529e-68
PPTG_13323		59.7308	25.6335	25.2555	-1.23283	-1.27104	1.86194e-13	2.5542e-14
PPTG_20188		1.70063	4.06777	4.07174	1.26045	1.24695	0.00502175	0.00529127
PPTG_23557		24.1514	56.9997	58.9209	1.23822	1.27097	4.42314e-09	1.46128e-09
PPTG_08942		108.07	43.5697	48.1971	-1.31887	-1.19436	2.88408e-41	9.49874e-35
PPTG_12208		150.447	61.2489	66.1634	-1.30419	-1.21298	8.17088e-37	1.4257e-32
PPTG_20630		16.9404	7.66706	6.69442	-1.15747	-1.37063	1.45004e-05	2.3894e-07
PPTG_10612		6.17554	2.57678	2.65473	-1.27262	-1.24783	4.64552e-06	6.01816e-06
PPTG_06746		3.6603	1.57668	1.46682	-1.2036	-1.32385	0.0224329	0.0107613
PPTG_20894		45.8779	20.4421	18.0487	-1.16726	-1.37055	2.76201e-12	2.55457e-16
PPTG_23309		180.927	73.408	78.8651	-1.3123	-1.2234	3.17213e-19	5.82786e-17
PPTG_23585		9.02021	3.88689	3.6266	-1.20448	-1.3332	0.00242682	0.00070051
PPTG_17758		7.92485	18.8388	19.9129	1.2396	1.29556	1.6563e-08	2.56578e-09
PPTG_24656		3.02707	8.07609	6.78614	1.41172	1.13801	0.000169558	0.00334842
PPTG_23644		7.83768	3.27129	3.26052	-1.26343	-1.27177	0.00139941	0.00120177
PPTG_02196		272.56	111.23	117.611	-1.29922	-1.23731	9.49172e-42	3.94532e-38
PPTG_22210		44.3078	18.8508	18.4071	-1.24699	-1.29326	9.93418e-17	4.62913e-18
PPTG_24174		39.3802	15.1341	18.104	-1.39564	-1.15564	8.13552e-13	1.65236e-09
PPTG_17791		3.38859	7.99468	8.4883	1.2366	1.30628	2.94714e-06	5.80735e-07
PPTG_11671		6.52808	16.5626	15.8194	1.31423	1.22913	9.6746e-07	5.09895e-06
PPTG_08117		74.5249	26.6303	35.7143	-1.48802	-1.08579	1.13088e-42	7.18577e-24
PPTG_22270		9.10518	4.1414	3.49877	-1.15048	-1.40709	1.48564e-08	4.71351e-12
PPTG_08587		109.681	266.498	268.637	1.2762	1.27188	3.17177e-48	4.41243e-48
PPTG_03105		8.19914	20.3035	19.8876	1.29757	1.25407	3.64645e-18	4.50873e-17
PPTG_24357		43.9527	17.6974	19.1626	-1.32201	-1.23113	5.08929e-07	2.80087e-06
PPTG_17052		61.8106	25.4677	26.2045	-1.29078	-1.26159	1.87789e-32	1.46073e-31
PPTG_14876		31.4444	12.2924	13.8487	-1.36083	-1.19885	8.61339e-13	1.6265e-10
PPTG_03410		16.5498	38.7272	42.0338	1.22696	1.3298	1.829e-13	8.44316e-16
PPTG_12520		5.74102	14.0309	14.2619	1.27449	1.28174	9.16139e-10	5.96205e-10
PPTG_05855		101.418	232.796	264.125	1.19752	1.36437	1.43747e-18	6.30457e-24
PPTG_03111		6.19172	2.2316	2.91339	-1.48502	-1.1033	2.27118e-08	2.40024e-05
PPTG_24655		2.64536	7.10671	5.9891	1.4222	1.15259	0.000133662	0.00271088
PPTG_18606		4.96603	11.2535	13.255	1.1764	1.39412	8.61071e-07	2.46538e-09
PPTG_21703		101.771	40.8675	44.0775	-1.32845	-1.2346	7.42061e-36	4.62306e-32
PPTG_23114		19.8711	7.42249	9.04459	-1.42503	-1.15175	1.6025e-08	3.6406e-06
PPTG_01718		16.7501	6.95021	6.98102	-1.2822	-1.2858	5.30964e-12	3.00524e-12
PPTG_20376		2.06528	5.41557	4.78864	1.3943	1.18597	0.00523052	0.0204575
PPTG_14913		23.4124	54.8549	60.8428	1.21996	1.356	2.26212e-09	2.08047e-11
PPTG_00165		1.49044	0.664292	0.572369	-1.19053	-1.38993	0.0426116	0.0158908
PPTG_22263		50.4179	22.7212	19.072	-1.16376	-1.42588	6.36582e-14	6.45508e-20
PPTG_14089		50.8191	21.1879	20.8016	-1.2647	-1.31218	9.14001e-15	6.36533e-16
PPTG_17249		3.7848	10.0354	8.80928	1.39013	1.1941	0.000126762	0.0012576
PPTG_22159		5.76385	2.19215	2.61459	-1.42075	-1.17094	0.000622158	0.00430398
PPTG_09199		11.2806	4.49863	4.77745	-1.33405	-1.2527	9.80895e-07	3.69072e-06
PPTG_22221		20.222	7.03662	9.70731	-1.52935	-1.0938	7.06864e-09	2.54857e-05
PPTG_21279		6.88168	17.3733	16.7104	1.33127	1.25835	4.68858e-39	4.71834e-35
PPTG_23566		68.6708	30.4469	26.0831	-1.18243	-1.42491	5.00809e-28	2.21055e-39
PPTG_22553		13.8977	33.6182	36.7655	1.24319	1.3571	3.93079e-11	2.93734e-13
PPTG_20776		6.07641	14.3442	16.0553	1.22991	1.3719	5.9242e-07	1.4613e-08
PPTG_16609		93.2691	228.73	235.076	1.28963	1.31245	2.47288e-58	1.00055e-60
PPTG_16004		3.73949	9.22896	9.31553	1.30542	1.2978	7.1552e-05	7.46508e-05
PPTG_03285		1.83091	4.60699	4.79944	1.27479	1.32898	0.0138085	0.00929608
PPTG_14382		4.98266	2.16159	1.97322	-1.2366	-1.37458	0.00320121	0.000922217
PPTG_20993		7.05141	3.24517	2.54831	-1.13917	-1.49334	0.0084743	0.000474098
PPTG_18382		1.36573	3.61488	3.35805	1.36298	1.24812	0.00467984	0.0104578
PPTG_04222		650.85	263.888	269.287	-1.31154	-1.30021	4.82812e-111	1.45738e-109
PPTG_22867		208.395	87.591	83.2313	-1.2622	-1.35164	4.35586e-40	7.07259e-46
PPTG_07381		1.78856	4.59247	4.34739	1.35797	1.25852	5.1993e-06	2.7217e-05
PPTG_07118		64.0266	27.5141	24.8	-1.22742	-1.39435	1.24793e-22	1.30897e-28
PPTG_21146		3.14536	6.97222	9.36909	1.11623	1.53813	0.00892225	0.000125411
PPTG_24600		833.797	337.974	340.872	-1.30953	-1.3126	1.73078e-87	2.27805e-88
PPTG_07600		5.21492	1.8925	2.39635	-1.48762	-1.15586	0.000375162	0.0052144
PPTG_14909		19.3067	7.30222	8.40198	-1.41166	-1.22007	2.30127e-07	6.64723e-06
PPTG_21584		101.731	41.647	41.0404	-1.29217	-1.33368	3.13209e-22	9.34251e-24
PPTG_22029		10.9203	26.4053	28.7625	1.2603	1.36862	6.18541e-20	1.1019e-23
PPTG_21589		356.233	145.257	145.264	-1.30487	-1.32345	2.1838e-46	6.54031e-48
PPTG_20161		10.2007	4.22397	4.00065	-1.27041	-1.36426	0.00149729	0.000579337
PPTG_23669		3.68462	9.74433	9.02428	1.39245	1.25506	4.66622e-05	0.000287151
PPTG_14898		8.15916	20.4117	20.9399	1.31364	1.33043	3.49311e-09	1.76738e-09
PPTG_06357		127.043	51.4676	51.2906	-1.31128	-1.33382	1.38022e-110	2.02637e-115
PPTG_00904		29.2787	12.9464	10.7348	-1.18478	-1.47659	1.42043e-16	1.3954e-24
PPTG_10172		5.73326	15.2546	14.0849	1.39207	1.25679	4.94244e-05	0.000290603
PPTG_02119		33.3957	81.4261	88.2483	1.28004	1.37972	1.61009e-12	1.88742e-14
PPTG_05885		5.1303	12.9819	12.6841	1.35324	1.3052	2.12142e-09	7.65767e-09
PPTG_22094		5.26861	2.28772	1.92669	-1.19671	-1.47637	0.0265097	0.00513067
PPTG_03103		240.943	94.7458	98.6087	-1.3508	-1.31262	3.28161e-133	1.52211e-127
PPTG_02987		15.7526	36.67	43.7592	1.22138	1.46031	5.4344e-14	7.24438e-20
PPTG_11944		162.576	64.2124	65.8734	-1.35058	-1.32969	2.88013e-63	1.00433e-61
PPTG_22739		21.8195	9.05509	8.40672	-1.28814	-1.39648	2.12659e-08	1.07901e-09
PPTG_18381		0.895537	2.44034	2.26696	1.40101	1.28595	0.00700493	0.0143502
PPTG_04703		2.46852	1.0512	0.90866	-1.24623	-1.44666	0.0292496	0.0101072
PPTG_21785		8.14627	22.4651	20.056	1.43998	1.2572	1.07325e-09	1.40146e-07
PPTG_11645		2.62412	6.5344	7.06227	1.29751	1.39686	0.000963781	0.000292017
PPTG_17794		21.019	7.80578	8.81912	-1.42828	-1.26914	2.18888e-07	3.29213e-06
PPTG_24361		23.9397	59.918	62.029	1.33077	1.36423	8.66746e-10	2.78813e-10
PPTG_22093		398.755	159.253	157.859	-1.33508	-1.36345	1.29393e-126	1.03477e-132
PPTG_04160		58.7815	22.9693	23.767	-1.3681	-1.33203	1.87648e-13	5.86937e-13
PPTG_10964		5.68515	1.97846	2.57077	-1.55395	-1.17315	0.000946142	0.0131795
PPTG_03676		1.53866	4.05619	3.83217	1.39886	1.30424	8.69564e-05	0.000279113
PPTG_00343		2.74326	1.3057	0.871826	-1.09443	-1.66889	0.0289152	0.00074671
PPTG_21306		9.38442	3.22076	4.27119	-1.56449	-1.16855	1.07281e-06	0.000215678
PPTG_07591		83.6175	33.7969	32.7124	-1.321	-1.38574	1.45778e-23	6.58183e-26
PPTG_17640		36.5366	14.5208	14.3564	-1.34151	-1.36595	2.26047e-09	9.39256e-10
PPTG_07563		7.48702	20.1167	18.5748	1.42137	1.29056	5.28625e-11	3.12565e-09
PPTG_07117		3.45489	9.78145	8.27607	1.49466	1.22763	0.00022799	0.00324356
PPTG_14522		8.36233	3.48445	3.06827	-1.2542	-1.46556	3.86774e-05	1.4519e-06
PPTG_10841		1.53947	0.727255	0.480746	-1.10477	-1.68759	0.0406603	0.0013278
PPTG_06889		44.2689	112.316	118.611	1.337	1.39731	8.70179e-47	1.33492e-51
PPTG_14946		6.02238	2.39714	2.32572	-1.33529	-1.39975	4.04346e-05	1.45314e-05
PPTG_11956		16.0168	39.8413	44.1319	1.30329	1.43581	1.76854e-16	4.29253e-20
PPTG_23641		2.50038	5.96286	7.24243	1.24494	1.50797	0.0179606	0.00281602
PPTG_03587		1.01386	2.75073	2.55531	1.43696	1.30783	0.00262667	0.00682308
PPTG_22620		19.9919	49.4022	54.139	1.31532	1.43051	2.96928e-17	1.92148e-20
PPTG_05213		11.8244	30.6141	31.0426	1.3699	1.37387	3.2849e-18	1.88882e-18
PPTG_11646		2.76981	7.1441	7.42841	1.35471	1.39076	1.6681e-06	7.04364e-07
PPTG_11139		2.24852	5.4195	6.29498	1.27884	1.47691	0.00148548	0.000164356
PPTG_12146		12.7562	32.6093	33.743	1.35954	1.38932	1.13628e-20	9.78826e-22
PPTG_07982		3.08762	7.13806	9.35123	1.20736	1.56497	0.000103452	1.79723e-07
PPTG_24752		303.499	119.629	117.049	-1.34821	-1.40148	3.43202e-31	1.04171e-33
PPTG_20883		7.872	22.1924	19.6562	1.46976	1.28565	1.12475e-09	1.35263e-07
PPTG_16520		0.898416	2.52206	2.23031	1.47935	1.27753	0.000216585	0.00173624
PPTG_14233		150.051	389.668	397.818	1.36975	1.38187	8.23907e-87	1.16162e-88
PPTG_04079		34.5192	90.2089	90.0897	1.38633	1.36736	8.57406e-31	4.29915e-30
PPTG_02122		6.75832	2.89281	2.3207	-1.22905	-1.55315	0.0461834	0.00908658
PPTG_02633		30.7412	12.0421	11.9013	-1.36273	-1.40094	7.9035e-19	5.48026e-20
PPTG_07860		4.47714	10.5618	13.3261	1.23486	1.54823	2.35835e-06	9.74061e-10
PPTG_04991		5.31708	12.6967	15.7468	1.24231	1.54013	4.42846e-08	3.75584e-12
PPTG_12441		1.69383	5.12169	3.83543	1.61167	1.19294	0.0010191	0.0206712
PPTG_17090		3.0648	1.13196	1.2517	-1.45692	-1.32052	5.18314e-05	0.000232039
PPTG_15370		67.207	24.2539	27.6601	-1.47585	-1.30883	6.18838e-30	9.3188e-25
PPTG_21950		2.35147	5.65739	7.13054	1.24411	1.55415	0.0116501	0.000975012
PPTG_14918		10.1765	4.05665	3.75792	-1.32553	-1.4602	6.13434e-05	8.66013e-06
PPTG_14287		1.54185	4.65943	3.79164	1.56702	1.24716	0.00027723	0.00512971
PPTG_22219		20.3911	7.54638	7.96603	-1.42852	-1.37945	2.02617e-07	4.31886e-07
PPTG_00162		10.5302	27.568	29.5568	1.36086	1.44918	3.3749e-10	1.51636e-11
PPTG_06677		36.4216	13.5309	14.0964	-1.42926	-1.38839	1.3524e-16	4.71804e-16
PPTG_20032		7.6318	20.4293	20.5377	1.41338	1.40696	1.59235e-15	1.71755e-15
PPTG_10568		0.453328	1.1486	1.2546	1.35657	1.46625	0.0303042	0.0163612
PPTG_11075		4.53468	1.8419	1.56773	-1.2817	-1.55481	0.0232797	0.00523088
PPTG_22076		3.41107	8.67396	9.6732	1.34613	1.48527	7.78055e-09	1.1091e-10
PPTG_14512		22.2389	57.2145	62.6466	1.35973	1.47078	1.65595e-31	3.37334e-37
PPTG_17070		12.329	32.819	33.6059	1.40641	1.42368	3.18807e-16	1.08478e-16
PPTG_23525		6.56603	19.662	16.409	1.56192	1.28417	5.79494e-11	1.21155e-07
PPTG_17732		3.17483	8.60365	8.39511	1.44424	1.38916	2.96113e-08	9.77981e-08
PPTG_11700		114.167	42.6228	43.7334	-1.42842	-1.40515	1.12467e-49	7.66449e-49
PPTG_04080		28.471	78.2234	74.9368	1.45725	1.37901	3.48205e-35	1.19026e-31
PPTG_24358		53.5624	21.2918	19.2967	-1.33959	-1.50149	3.32362e-16	6.01056e-20
PPTG_09799		30.6263	81.3546	85.5315	1.39501	1.452	3.94377e-34	2.80536e-37
PPTG_17854		14.484	37.6004	40.5772	1.37871	1.4709	9.43115e-21	9.62631e-24
PPTG_08595		3.89977	1.42607	1.47715	-1.4476	-1.4036	0.00017704	0.000241758
PPTG_02416		97.6699	34.4926	39.0315	-1.50805	-1.35044	1.55264e-41	9.57458e-35
PPTG_23071		37.111	101.566	100.732	1.44237	1.4131	2.36651e-58	3.02069e-56
PPTG_24529		24.9358	9.80106	9.08527	-1.37165	-1.48656	2.17582e-09	7.83442e-11
PPTG_18172		1.82819	5.84053	4.34522	1.67793	1.21657	0.000650726	0.0194283
PPTG_24649		18.1308	7.8495	5.82136	-1.22129	-1.6732	3.54066e-05	1.53699e-08
PPTG_23304		1.94684	5.20167	5.59504	1.38433	1.47649	0.000923509	0.000336605
PPTG_16005		4.1915	11.6351	11.3148	1.45925	1.40112	4.14172e-10	1.97055e-09
PPTG_21175		2.77387	8.38987	6.94727	1.58477	1.29126	5.09183e-05	0.00135381
PPTG_04995		9.11351	24.4557	24.9413	1.42617	1.43939	1.25111e-10	7.12553e-11
PPTG_21985		14.6394	5.36167	5.65963	-1.46446	-1.4019	9.28466e-08	2.35218e-07
PPTG_16608		106.689	285.416	295.596	1.41616	1.45017	2.64832e-86	4.70331e-91
PPTG_05846		25.0328	65.551	70.1655	1.39308	1.47502	9.62416e-12	4.11847e-13
PPTG_17024		39.5837	103.58	113.735	1.37853	1.49726	8.95688e-23	6.38798e-27
PPTG_13404		0.379292	1.10689	0.985392	1.5322	1.35287	0.00143579	0.00569375
PPTG_05896		7.30584	18.5573	21.4391	1.3535	1.53438	1.19769e-08	5.31999e-11
PPTG_06722		3.29897	10.698	7.7293	1.70991	1.21803	2.74985e-07	0.000472008
PPTG_23639		21.3393	7.22682	8.68691	-1.56994	-1.3278	1.11327e-12	1.05979e-09
PPTG_21851		2.02841	5.41509	5.70657	1.41052	1.47958	0.00241833	0.00129093
PPTG_09192		11.0541	30.3377	30.6971	1.44691	1.45013	4.38799e-18	2.75582e-18
PPTG_09795		6.11597	1.70844	2.83066	-1.8389	-1.14218	2.08398e-05	0.00630496
PPTG_17733		11.6252	4.01161	4.67034	-1.55377	-1.35644	2.30538e-07	4.89861e-06
PPTG_22856		211.904	72.8778	82.6978	-1.54141	-1.37682	2.19606e-22	3.0918e-18
PPTG_17446		213.901	80.0903	77.1626	-1.42464	-1.49186	9.05793e-63	5.8439e-69
PPTG_01125		47.7091	17.2344	17.8258	-1.47569	-1.44236	7.15015e-26	3.66548e-25
PPTG_14960		5.89945	1.53808	2.85306	-1.97432	-1.0787	8.76866e-05	0.0317783
PPTG_02434		2.80519	1.12094	0.95489	-1.34286	-1.58681	0.00580763	0.000964708
PPTG_21759		66.262	22.6555	26.147	-1.55349	-1.37201	3.7378e-27	3.33767e-22
PPTG_22348		6.0283	18.1456	15.75	1.5737	1.35589	5.32655e-15	2.67647e-11
PPTG_21431		10.138	26.8628	30.1386	1.39334	1.53835	9.18962e-11	4.37388e-13
PPTG_12974		10.6269	30.7832	28.2349	1.53731	1.39652	6.29871e-21	2.19116e-17
PPTG_07967		28.6719	9.97243	11.0832	-1.53911	-1.39557	7.03597e-14	5.75737e-12
PPTG_24964		7.29108	18.671	23.1746	1.32588	1.6228	4.8546e-09	2.11232e-13
PPTG_24173		38.956	13.4906	14.9064	-1.53239	-1.40901	1.20579e-15	9.90747e-14
PPTG_24421		72.1281	198.868	206.544	1.45266	1.48961	1.44262e-59	7.3808e-63
PPTG_16856		7.43391	20.9783	20.7342	1.48874	1.4536	5.02409e-15	1.93821e-14
PPTG_24954		22.5849	6.71093	9.84305	-1.75673	-1.23237	4.07455e-14	3.30009e-08
PPTG_23121		11.2203	32.0916	31.0765	1.50521	1.4416	1.83045e-14	2.2041e-13
PPTG_20430		20.2528	6.54248	8.19794	-1.63053	-1.33169	1.25998e-14	1.16678e-10
PPTG_21776		5.29821	13.8828	16.1478	1.37321	1.58618	6.31371e-06	9.77066e-08
PPTG_21304		8.08861	22.1737	22.6801	1.46734	1.48457	2.95123e-15	1.02073e-15
PPTG_03610		5.61216	1.98015	2.14981	-1.53246	-1.42649	0.00136432	0.0025632
PPTG_00124		29.2859	82.921	83.0587	1.4862	1.47325	3.79941e-19	7.14335e-19
PPTG_16268		1.77759	4.98687	5.18514	1.45689	1.50394	2.36417e-08	6.38722e-09
PPTG_18170		116.301	41.8612	42.3029	-1.48003	-1.48333	8.43932e-79	5.44728e-80
PPTG_22865		69.5438	25.1921	24.978	-1.46728	-1.50133	2.24241e-29	5.05771e-31
PPTG_17797		6.44956	1.76919	2.89992	-1.85776	-1.18911	3.20348e-06	0.0026663
PPTG_11666		2.38975	6.25585	7.32183	1.38811	1.59213	0.000100348	5.02195e-06
PPTG_22728		76.4958	26.3352	28.8183	-1.54714	-1.42897	8.18229e-27	1.04378e-23
PPTG_24075		23.5719	11.8094	5.23902	-1.00779	-2.19385	9.1249e-05	2.67586e-16
PPTG_22111		16.6971	44.8428	50.0718	1.42098	1.56058	4.19487e-17	1.02576e-20
PPTG_22398		116.388	316.712	343.954	1.43859	1.54194	4.00133e-23	1.70299e-26
PPTG_12997		16.6966	47.2977	47.547	1.49318	1.48611	1.30617e-25	1.62767e-25
PPTG_05647		5.71798	14.8599	17.4739	1.38749	1.60001	7.96749e-13	5.4296e-17
PPTG_21243		21.0024	59.8747	59.3689	1.50597	1.47988	3.14734e-27	1.93443e-26
PPTG_13005		2.55393	0.789013	1.05089	-1.70337	-1.30905	0.0097849	0.0460189
PPTG_17403		2.44291	0.725376	1.00226	-1.74674	-1.27986	0.00170955	0.0211793
PPTG_21091		2.04171	6.19733	5.65039	1.58231	1.41291	0.0029993	0.00908658
PPTG_01939		2.05137	0.658797	0.805971	-1.66051	-1.35013	0.0101141	0.0367827
PPTG_22208		17.7503	5.94514	6.77289	-1.57549	-1.42477	6.02404e-07	5.09261e-06
PPTG_19134		3.9408	1.55267	1.24946	-1.34506	-1.67313	0.00661795	0.000643881
PPTG_23630		10.2748	3.53947	3.77777	-1.53424	-1.46766	4.03313e-09	1.13283e-08
PPTG_19135		3.88762	1.46835	1.30653	-1.4107	-1.59648	0.000187719	2.04309e-05
PPTG_20844		211.026	74.4014	76.3519	-1.51093	-1.49494	1.96732e-52	5.66056e-52
PPTG_09491		1.14751	3.1722	3.36288	1.46329	1.54485	0.00179507	0.000842097
PPTG_10048		4.46462	1.68578	1.5279	-1.43902	-1.57184	0.0112429	0.00506453
PPTG_22138		5.30946	15.3804	14.8606	1.54129	1.47142	4.19484e-08	1.73787e-07
PPTG_03394		23.9618	64.6374	72.1593	1.43749	1.57873	7.97626e-23	1.44938e-27
PPTG_24188		14.7944	5.82273	4.65787	-1.34855	-1.68395	2.12011e-05	1.05869e-07
PPTG_19194		14.1624	5.16184	4.83233	-1.45001	-1.56825	1.92078e-11	3.55667e-13
PPTG_14537		83.2978	29.5232	29.5849	-1.50615	-1.52013	9.7282e-37	9.28431e-38
PPTG_02226		0.809095	0.254794	0.317304	-1.6755	-1.36968	0.0127883	0.0381153
PPTG_13397		2.94804	1.00398	1.08544	-1.57227	-1.46271	0.00627925	0.0106199
PPTG_14526		2.76765	7.66547	8.42338	1.45735	1.58283	6.73685e-07	4.1908e-08
PPTG_18118		0.832688	2.47225	2.42415	1.54124	1.50099	0.0004147	0.000587841
PPTG_14098		53.9924	18.1745	19.7301	-1.57154	-1.47392	3.34701e-26	6.78841e-24
PPTG_22130		3.56237	10.6352	10.1905	1.56453	1.48201	3.84028e-06	1.30181e-05
PPTG_13330		83.9182	26.0928	32.9064	-1.69078	-1.3743	3.25427e-52	4.24187e-37
PPTG_24998		8.41911	24.1031	24.4883	1.52349	1.5304	3.61071e-11	2.40494e-11
PPTG_20814		109.538	38.7905	37.8076	-1.50021	-1.55532	1.26898e-26	1.18082e-28
PPTG_10165		4.14923	11.5759	12.6134	1.47463	1.58285	9.64292e-09	4.96727e-10
PPTG_05578		82.2362	29.5606	28.3404	-1.48812	-1.57002	1.13699e-18	1.04481e-20
PPTG_24697		4.00623	12.6619	10.6467	1.66735	1.40739	2.41005e-06	9.62985e-05
PPTG_23436		195.27	71.1874	65.7671	-1.46928	-1.59877	1.21441e-34	8.97425e-41
PPTG_20674		14.5723	42.4044	43.0501	1.53468	1.53547	5.48703e-19	4.01313e-19
PPTG_11936		1.02553	0.397173	0.321531	-1.39137	-1.69466	0.00720082	0.00100074
PPTG_22779		6.14963	17.0443	19.0572	1.46642	1.60873	2.26047e-09	2.86763e-11
PPTG_08658		33.8618	11.0225	12.615	-1.63434	-1.45038	3.44344e-13	6.16059e-11
PPTG_13558		2.24602	0.895039	0.660237	-1.33951	-1.77018	0.00729256	0.000336594
PPTG_05565		97.3303	34.2961	33.2196	-1.51268	-1.57316	2.96162e-35	3.23629e-38
PPTG_15310		23.5308	70.5393	67.7624	1.57961	1.5069	5.34256e-25	7.19154e-23
PPTG_21041		40.4091	117.033	124.134	1.51594	1.58215	9.52327e-30	1.68654e-32
PPTG_23672		2.68976	10.4174	6.29038	1.97273	1.21794	2.26558e-07	0.00298066
PPTG_20475		7.75532	2.12042	3.23496	-1.86402	-1.29064	2.4099e-05	0.00306393
PPTG_24913		17.6682	49.9866	54.9302	1.49795	1.61599	3.3025e-21	7.60333e-25
PPTG_21808		14.3244	43.0856	42.3513	1.57765	1.5345	1.46248e-20	1.51106e-19
PPTG_24994		2.98936	10.1304	8.1921	1.72117	1.40687	2.06327e-06	0.000155467
PPTG_08708		2.61317	0.781658	1.01414	-1.74498	-1.3916	9.14209e-05	0.00135892
PPTG_18482		573.589	196.474	197.763	-1.55546	-1.56116	4.53086e-132	7.24519e-134
PPTG_11302		29.4321	9.62668	10.5022	-1.60837	-1.51112	2.10829e-16	4.33378e-15
PPTG_05882		76.0593	26.8674	25.4964	-1.51813	-1.60191	1.85517e-28	1.26886e-31
PPTG_25027		38.0725	110.536	117.651	1.52477	1.59845	1.51061e-65	7.12911e-73
PPTG_20635		9.4541	3.3579	3.10992	-1.51476	-1.61411	0.000111757	3.45419e-05
PPTG_22322		9.14834	25.9362	28.2668	1.51621	1.61788	4.05733e-10	1.78678e-11
PPTG_05584		534.584	181.849	183.124	-1.56377	-1.57062	1.35947e-264	6.1134e-269
PPTG_14206		20.4121	63.9171	58.6507	1.63993	1.49844	2.6565e-69	7.1124e-58
PPTG_22145		21.6738	7.13694	7.72829	-1.62246	-1.51463	1.33872e-07	7.04705e-07
PPTG_23792		106.812	35.3337	37.6289	-1.6043	-1.53213	3.57417e-60	4.99478e-56
PPTG_24371		42.0669	13.7463	14.8264	-1.61333	-1.52906	1.31016e-12	1.16476e-11
PPTG_20884		6.76346	20.822	20.1541	1.60239	1.54271	6.41112e-12	3.75864e-11
PPTG_20671		17.4207	5.3322	6.58953	-1.72854	-1.43073	1.07526e-09	2.25664e-07
PPTG_24781		13.4398	4.36712	4.72851	-1.61245	-1.53422	3.61014e-05	7.51412e-05
PPTG_12798		8.71357	2.89752	3.02685	-1.60446	-1.54216	1.65292e-05	2.80292e-05
PPTG_13259		0.261225	0.10197	0.0784931	-1.39978	-1.76772	0.0488302	0.0116475
PPTG_00349		65.3069	22.8132	21.6346	-1.52617	-1.62278	2.02142e-40	1.41308e-45
PPTG_16607		103.598	302.068	321.346	1.53845	1.61115	4.66758e-122	1.89407e-134
PPTG_04275		3.48208	1.32432	1.00678	-1.37304	-1.80844	0.000566541	5.96435e-06
PPTG_05681		3.72464	10.7868	12.0061	1.50951	1.64682	7.66431e-11	7.81576e-13
PPTG_08746		51.279	17.918	16.7182	-1.5208	-1.63485	9.54025e-33	1.35727e-37
PPTG_08781		2.62463	7.26582	8.77504	1.4558	1.70856	0.000105441	2.80087e-06
PPTG_13841		4.50418	1.56303	1.50806	-1.55549	-1.60114	0.00172211	0.00116075
PPTG_20499		19.7519	57.211	63.3756	1.51545	1.64546	9.00659e-24	4.27591e-28
PPTG_03224		8.50649	2.5173	3.21129	-1.75439	-1.42189	4.04313e-09	9.24916e-07
PPTG_24129		9.01183	28.053	26.2333	1.63847	1.52268	3.09253e-12	1.06378e-10
PPTG_08592		2.73487	1.03837	0.781815	-1.38441	-1.81018	0.00313703	0.000116548
PPTG_23673		3.07927	10.8202	7.99866	1.83307	1.368	1.66762e-06	0.000599751
PPTG_01522		0.794378	2.61384	2.24717	1.69773	1.47742	0.000114583	0.00100282
PPTG_11706		2.1252	6.57248	6.3252	1.62097	1.54894	4.87213e-06	1.32666e-05
PPTG_06283		126.886	45.5332	39.7724	-1.48249	-1.69666	9.29422e-57	1.46873e-72
PPTG_21163		81.8962	28.7257	26.1836	-1.51898	-1.66654	4.63713e-29	1.36591e-34
PPTG_17374		0.679068	1.92598	2.17148	1.51957	1.66667	2.31433e-06	1.34461e-07
PPTG_04087		71.4508	22.873	25.2345	-1.65448	-1.53153	1.73267e-44	2.2545e-39
PPTG_02571		4.6258	15.0212	13.556	1.68121	1.51519	4.89413e-15	2.3611e-12
PPTG_24145		6.09901	18.9124	18.4222	1.62495	1.56798	5.29566e-10	2.08621e-09
PPTG_23662		13.8315	4.57994	4.68428	-1.60943	-1.58833	5.13822e-10	6.57929e-10
PPTG_07978		39.0809	12.8186	13.2844	-1.62129	-1.57944	7.57496e-22	2.62055e-21
PPTG_20470		15.7566	5.67197	4.80841	-1.48181	-1.73754	5.01899e-10	5.3714e-13
PPTG_21772		32.8469	10.0239	11.7953	-1.71988	-1.49746	7.57634e-20	4.82861e-16
PPTG_21622		16.1342	4.75262	5.95841	-1.77042	-1.45499	4.51627e-09	7.8552e-07
PPTG_18435		1.10513	3.34493	3.37037	1.60823	1.60673	0.00466459	0.00450327
PPTG_00385		10.3401	31.1	31.8259	1.59758	1.61932	2.45415e-17	6.82063e-18
PPTG_02127		3.40267	8.60224	13.3419	1.33114	1.94513	1.49601e-06	1.35449e-13
PPTG_23443		3.79172	10.628	12.8682	1.48904	1.74503	4.64767e-10	8.69011e-14
PPTG_10398		0.768116	2.0739	2.78932	1.4127	1.84047	0.00454557	9.72963e-05
PPTG_24070		2.53348	9.18757	7.05278	1.83634	1.42832	1.56747e-06	0.000311832
PPTG_22146		14.9539	5.00281	4.90016	-1.60311	-1.6396	2.85937e-07	1.29422e-07
PPTG_21763		35.0151	97.5889	121.924	1.47691	1.78245	3.83156e-13	7.76765e-19
PPTG_06890		13.0396	38.3404	42.771	1.56136	1.69964	5.00153e-26	4.21205e-31
PPTG_03789		0.946379	2.95756	3.13246	1.60128	1.66765	0.00210475	0.00118901
PPTG_14158		0.978522	2.83203	3.06257	1.58337	1.68721	0.00965651	0.00505829
PPTG_22724		7.46173	23.1107	23.2999	1.64434	1.63907	3.19147e-13	3.36271e-13
PPTG_21411		4.09509	1.27011	1.43835	-1.73948	-1.55262	0.0114609	0.0223257
PPTG_10713		118.848	41.2355	35.4856	-1.53032	-1.76518	6.37962e-55	4.59608e-71
PPTG_22349		8.56065	27.8956	26.2083	1.69748	1.59261	6.38571e-18	7.02114e-16
PPTG_09928		13.7528	39.6398	48.9609	1.50982	1.79404	1.29482e-20	2.57643e-29
PPTG_22501		1.11708	0.445375	0.27636	-1.32971	-2.03771	1.00952e-07	4.42514e-15
PPTG_20716		29.983	9.40034	10.0445	-1.68488	-1.60989	2.66053e-20	3.65791e-19
PPTG_04186		6.55665	2.61743	1.61014	-1.33018	-2.04047	6.57959e-05	2.53563e-09
PPTG_17691		3.72409	1.29006	1.08857	-1.53354	-1.77202	0.000836605	0.000101143
PPTG_16267		39.6338	124.51	125.956	1.64865	1.6498	1.85415e-45	1.14414e-45
PPTG_22604		1.37776	3.87557	5.11552	1.4683	1.85685	0.0081946	0.000435541
PPTG_12341		29.641	9.41735	9.63509	-1.65447	-1.64914	5.3726e-18	3.92941e-18
PPTG_13174		7.96294	2.4428	2.61577	-1.69257	-1.61515	2.51653e-07	6.44752e-07
PPTG_18685		0.335996	1.02247	1.0851	1.61531	1.69612	0.00422468	0.00230043
PPTG_23286		3.58575	1.17299	1.13395	-1.62868	-1.68236	0.00109988	0.000667818
PPTG_16606		12.7926	37.0789	44.8066	1.53526	1.78933	3.53055e-20	1.85008e-27
PPTG_16162		61.4473	19.5445	19.2321	-1.64143	-1.67567	0.0305712	0.0258502
PPTG_16355		13.6587	41.1865	47.2268	1.57504	1.75274	7.53334e-19	1.77942e-23
PPTG_17684		25.5147	8.48247	7.58003	-1.5878	-1.76459	4.9753e-19	5.72476e-23
PPTG_23301		5.7018	18.7563	18.2522	1.7039	1.64894	6.90958e-11	2.70189e-10
PPTG_20723		18.581	6.39661	5.31269	-1.53943	-1.83464	1.48508e-08	2.28254e-11
PPTG_05564		84.7614	27.5265	25.7464	-1.62862	-1.74088	3.68905e-55	1.17296e-62
PPTG_14381		1.30087	0.317742	0.51658	-2.07179	-1.37595	0.00136621	0.0287757
PPTG_14943		2.97523	9.86543	9.28445	1.75174	1.64091	1.06302e-07	7.21325e-07
PPTG_22953		18.1469	5.96499	5.28093	-1.60805	-1.78821	1.85255e-06	1.08239e-07
PPTG_07562		8.90854	28.3895	29.3271	1.6819	1.71023	1.81751e-14	4.86777e-15
PPTG_19517		6.57454	20.3072	22.7637	1.62458	1.77303	2.76384e-16	1.46026e-19
PPTG_22505		20.9293	7.08528	6.00112	-1.58117	-1.82664	2.42134e-09	7.99878e-12
PPTG_17050		30.1862	9.12975	9.65394	-1.73215	-1.66987	8.52829e-43	6.58216e-41
PPTG_21319		14.2352	47.2529	46.1733	1.7267	1.67595	1.57168e-43	3.46369e-41
PPTG_09520		3.15413	1.07871	0.901501	-1.56504	-1.85082	0.00199372	0.000259159
PPTG_00083		3.81589	1.28231	1.10355	-1.58861	-1.82548	0.00106471	0.000165171
PPTG_14755		0.533452	2.19849	1.47049	2.02628	1.43206	1.03917e-05	0.00319142
PPTG_22136		8.61644	28.5994	28.8593	1.7124	1.71058	3.11685e-27	2.5498e-27
PPTG_00386		40.2021	128.863	137.229	1.67515	1.74997	3.5093e-49	7.48621e-54
PPTG_22350		6.40935	22.0214	20.5851	1.77276	1.66044	2.17561e-15	1.31242e-13
PPTG_17812		14.7533	4.31312	4.71607	-1.76324	-1.67016	1.13674e-12	1.0339e-11
PPTG_16194		28.5891	89.5981	102.927	1.62823	1.81164	9.28495e-23	3.81898e-28
PPTG_12962		13.537	43.5854	47.1019	1.67113	1.76573	1.81931e-28	4.82424e-32
PPTG_11798		346.752	103.719	109.659	-1.75	-1.68704	1.6439e-216	4.94232e-206
PPTG_21277		21.2651	7.62287	5.35015	-1.4767	-2.01214	2.1979e-05	5.93444e-09
PPTG_21480		2.41897	8.47171	7.96604	1.77435	1.67551	2.1483e-09	1.73266e-08
PPTG_05948		1.21543	0.40043	0.359111	-1.66247	-1.79453	0.0381577	0.0233211
PPTG_20290		38.6108	10.9411	12.5594	-1.81378	-1.648	5.01109e-19	2.66835e-16
PPTG_21040		49.8309	167.758	166.029	1.74505	1.71476	2.49848e-33	2.9273e-32
PPTG_07489		0.9552	0.297609	0.283004	-1.70781	-1.75229	0.0426273	0.0348073
PPTG_21136		8.96322	29.3773	31.3879	1.69069	1.77209	7.34146e-16	1.75301e-17
PPTG_03247		1.56029	5.31885	5.34323	1.73801	1.72435	2.76929e-06	3.08794e-06
PPTG_07752		0.366059	1.28118	1.30885	1.73308	1.73538	0.0211981	0.0199228
PPTG_11241		42.6243	13.3909	12.581	-1.68713	-1.78808	1.99746e-14	4.34009e-16
PPTG_12993		145.533	40.483	47.7919	-1.85172	-1.62929	4.43781e-112	1.55422e-91
PPTG_17757		88.423	26.0051	27.4965	-1.76584	-1.71075	2.97879e-50	4.94382e-48
PPTG_23516		32.7941	112.049	110.796	1.75638	1.72047	1.4851e-34	2.83531e-33
PPTG_08537		0.932758	3.27871	3.1615	1.77528	1.70868	0.00017366	0.000313405
PPTG_06392		0.405594	1.36819	1.3659	1.75574	1.7278	0.0116955	0.012839
PPTG_22933		6.65242	22.2864	22.5118	1.74427	1.74186	3.28224e-16	2.89836e-16
PPTG_11037		176.859	598.963	600.984	1.75517	1.7442	5.31455e-168	2.89068e-166
PPTG_20259		18.6291	6.13227	4.93677	-1.58319	-1.93762	6.93511e-07	1.56105e-09
PPTG_10076		37.4745	10.6259	11.8366	-1.82179	-1.68578	1.78589e-33	8.05402e-30
PPTG_15255		97.6309	29.6293	29.0414	-1.73073	-1.77804	2.37857e-56	7.66417e-60
PPTG_05579		81.641	24.85	24.2692	-1.73394	-1.77708	4.4501e-28	1.24962e-29
PPTG_06282		11.5293	3.40745	3.44845	-1.746	-1.76622	1.33255e-09	6.57066e-10
PPTG_04594		0.54603	1.71884	2.1235	1.62506	1.9014	0.014889	0.00313506
PPTG_14193		28.1343	96.0854	97.9987	1.75852	1.76661	5.8126e-35	2.0517e-35
PPTG_08588		12.1432	39.5341	43.5533	1.70418	1.82484	2.58773e-26	2.88745e-30
PPTG_14124		36.3002	123.461	126.179	1.75829	1.77173	6.93207e-55	5.26248e-56
PPTG_04224		18.8227	5.33999	5.86158	-1.82938	-1.70443	8.78736e-40	5.09056e-36
PPTG_19179		0.620798	1.95565	2.19413	1.70392	1.84516	0.00566503	0.00226088
PPTG_19910		165.902	50.5813	47.4616	-1.7224	-1.82796	2.04737e-82	1.32082e-92
PPTG_00911		1.32018	0.441135	0.349072	-1.63038	-1.93747	0.0345676	0.0112257
PPTG_22204		27.1489	92.3958	97.2319	1.74948	1.80749	2.73218e-31	1.72121e-33
PPTG_00227		2.05711	9.43545	5.57703	2.20683	1.43319	1.70571e-06	0.00339309
PPTG_21150		46.0782	157.485	163.626	1.76169	1.80052	1.31633e-54	2.96784e-57
PPTG_09535		37.7727	120.724	145.867	1.65902	1.91265	1.03327e-31	3.4141e-42
PPTG_05495		2.05485	6.85934	7.129	1.76569	1.8033	5.01509e-08	2.1457e-08
PPTG_21042		34.9504	122.193	122.344	1.79508	1.77796	7.47911e-80	1.74579e-78
PPTG_09857		111.295	31.7777	33.3709	-1.81395	-1.76266	1.43493e-102	4.15739e-99
PPTG_12832		6.57855	20.8512	25.65	1.65398	1.9361	3.4723e-20	4.84851e-28
PPTG_07879		23.8947	80.8773	84.725	1.7656	1.81675	5.2488e-32	5.61876e-34
PPTG_22971		0.15435	0.511511	0.617886	1.67512	1.92723	0.00352722	0.000524086
PPTG_21859		0.855973	2.78176	3.59843	1.62968	1.98273	0.00750438	0.000702611
PPTG_13777		37.4288	9.73695	11.9771	-1.94287	-1.66366	1.50375e-18	1.49409e-14
PPTG_20624		23.6957	7.20917	6.61441	-1.72985	-1.86868	6.30924e-16	2.71449e-18
PPTG_12340		36.9012	11.4547	9.94574	-1.68961	-1.91632	3.73858e-21	2.63603e-26
PPTG_03115		0.537599	1.60311	2.08298	1.62972	1.98851	0.0428139	0.00943569
PPTG_19947		0.456337	1.36078	1.76812	1.62972	1.98851	0.0428139	0.00943569
PPTG_13182		0.396265	0.140774	0.093998	-1.54111	-2.10487	0.0457742	0.00642645
PPTG_07701		15.5471	4.73687	4.2247	-1.70783	-1.90398	2.30427e-12	7.28292e-15
PPTG_09521		2.55855	0.766298	0.728411	-1.75005	-1.85946	0.00161452	0.00074671
PPTG_17424		6.57001	23.8332	23.0621	1.83767	1.77482	1.54945e-15	1.40446e-14
PPTG_24042		11.463	39.4614	42.6473	1.76544	1.86012	4.14422e-11	2.61518e-12
PPTG_10502		12.6489	3.73501	3.55362	-1.77089	-1.85561	1.27223e-18	2.18227e-20
PPTG_22404		30.491	7.87121	9.59175	-1.94782	-1.68842	4.3211e-14	2.86468e-11
PPTG_15348		6.11595	1.97859	1.54531	-1.6498	-1.9969	1.58977e-05	2.07285e-07
PPTG_05000		26.6387	7.4977	7.7431	-1.82304	-1.81015	3.9707e-16	3.8722e-16
PPTG_19240		3.38014	12.1423	12.251	1.81903	1.81436	1.7319e-11	1.70229e-11
PPTG_07487		10.4815	36.3672	38.6774	1.78146	1.85466	7.46062e-36	4.66138e-39
PPTG_13778		35.5944	8.97323	11.2612	-1.99552	-1.67823	6.73727e-20	3.01856e-15
PPTG_05265		0.44041	0.133836	0.119637	-1.75616	-1.91235	0.00124228	0.000414892
PPTG_00468		4.52435	16.1708	16.4062	1.82773	1.84164	1.34402e-10	8.19866e-11
PPTG_22815		0.148067	0.561442	0.571753	1.83151	1.84452	0.015088	0.0135933
PPTG_21865		9.92736	36.3497	35.4624	1.86701	1.80967	1.04352e-20	1.47509e-19
PPTG_21135		7.92776	29.0649	28.0489	1.87511	1.80488	7.3722e-22	2.36872e-20
PPTG_18261		6.68517	2.4194	1.35826	-1.46072	-2.32402	5.79936e-05	1.43169e-09
PPTG_24381		160.445	44.0221	45.7581	-1.8684	-1.83522	3.96881e-69	7.61275e-68
PPTG_01900		2.22175	8.03168	8.54271	1.82351	1.89592	9.83158e-10	1.62759e-10
PPTG_03411		9.56086	34.5843	35.9091	1.84455	1.8813	7.6578e-33	2.29113e-34
PPTG_24733		65.4587	235.732	245.616	1.8426	1.88473	4.56857e-70	1.34318e-73
PPTG_23580		9.45284	33.8133	36.4125	1.82476	1.91047	2.54294e-18	3.6444e-20
PPTG_04872		19.3723	66.375	77.9792	1.76513	1.97902	2.53735e-42	6.99064e-54
PPTG_22131		4.17488	14.9671	15.6393	1.85134	1.89453	3.02037e-18	3.23661e-19
PPTG_17025		40.9387	147.249	157.797	1.83366	1.91788	5.21546e-30	7.77192e-33
PPTG_22299		22.499	73.1142	95.1183	1.7029	2.06546	6.03313e-21	9.33344e-31
PPTG_21438		0.349946	1.40777	1.30169	1.94383	1.81399	0.0329853	0.0481895
PPTG_12703		1.29357	4.56209	4.83685	1.85144	1.90918	3.18186e-07	1.08838e-07
PPTG_08871		2.31116	8.45995	9.07865	1.84093	1.92973	2.80365e-06	7.05671e-07
PPTG_12831		10.7053	37.068	42.571	1.80466	1.986	1.38417e-31	1.04989e-38
PPTG_09072		63.0209	232.243	244.737	1.8667	1.92606	5.74498e-57	8.82708e-61
PPTG_12085		24.4946	6.64981	6.63475	-1.88925	-1.90392	1.6229e-39	1.54223e-40
PPTG_15358		165.793	631.49	622.49	1.92555	1.88867	2.57074e-248	3.23383e-239
PPTG_10149		11.235	41.2687	44.2988	1.86588	1.95076	4.75328e-69	4.44232e-76
PPTG_03205		17.9548	5.36395	4.20006	-1.73794	-2.10182	2.66799e-06	1.13741e-08
PPTG_18171		134.793	34.4474	37.6427	-1.96647	-1.86109	3.3022e-63	5.03188e-58
PPTG_20994		10.7566	33.3857	52.1363	1.63118	2.26292	6.73833e-08	1.69816e-14
PPTG_21786		12.2626	3.22317	3.26821	-1.93017	-1.91642	5.35325e-11	4.44568e-11
PPTG_23296		19.1383	5.22302	5.05464	-1.88575	-1.96216	1.74802e-10	2.64369e-11
PPTG_17223		76.0894	20.9918	19.5262	-1.86456	-1.98675	1.72827e-43	3.93505e-49
PPTG_11950		16.6536	61.915	65.9768	1.8926	1.96161	6.28342e-26	6.09918e-28
PPTG_07856		24.3943	6.79024	6.2393	-1.85767	-2.00482	3.42372e-19	5.42786e-22
PPTG_03788		1.52232	5.14528	6.66731	1.76444	2.11911	2.3077e-06	5.44974e-09
PPTG_06306		9.55771	34.963	38.8508	1.87247	2.00194	1.38654e-30	3.41885e-35
PPTG_22187		4.44944	1.22193	1.10962	-1.8583	-2.01838	6.18475e-05	1.30206e-05
PPTG_11157		2.99829	0.769707	0.798089	-1.9594	-1.91482	0.000167331	0.000191837
PPTG_15985		2.24105	8.06761	9.12211	1.86141	2.01598	9.61551e-09	3.20107e-10
PPTG_19576		2.01176	7.69406	8.02524	1.91409	1.96344	7.12639e-07	2.96905e-07
PPTG_21602		18.7534	73.4961	71.477	1.96852	1.91144	1.02627e-52	8.02642e-50
PPTG_24308		0.620439	1.90293	3.45588	1.56775	2.40422	0.0381725	0.000508707
PPTG_03336		4.27646	17.0659	16.2723	1.98433	1.90268	1.48298e-17	3.15081e-16
PPTG_03121		0.650674	2.22564	2.86826	1.77952	2.12546	1.61037e-05	1.08347e-07
PPTG_20305		1.22385	5.12636	4.88429	1.98485	1.90663	5.20288e-05	0.000106538
PPTG_15256		100.467	27.2512	25.5787	-1.89382	-2.00169	1.77403e-95	3.18912e-106
PPTG_23567		0.774968	2.43252	3.51121	1.7077	2.22416	0.0250081	0.00216037
PPTG_03066		1.57311	0.372024	0.468625	-2.12506	-1.78902	0.00431035	0.0134223
PPTG_17902		4.64707	1.35114	1.09635	-1.80947	-2.11202	2.63312e-07	2.35977e-09
PPTG_12087		3.06174	12.4808	11.3305	2.03598	1.87912	7.04542e-10	1.49108e-08
PPTG_19943		0.16978	0.663401	0.737572	1.90187	2.01913	0.0315325	0.0195991
PPTG_19201		34.6222	8.98182	9.09926	-1.96046	-1.96311	1.70386e-23	6.25528e-24
PPTG_23964		75.1528	20.4476	18.5144	-1.88273	-2.04536	3.28369e-37	2.61926e-43
PPTG_03875		0.56528	0.190953	0.107166	-1.60118	-2.41543	0.00946793	0.000142286
PPTG_22615		0.311664	1.23108	1.28945	1.93853	1.99816	0.0424414	0.0335804
PPTG_15369		42.6233	10.8041	10.9694	-1.98349	-1.97613	3.25884e-33	1.25186e-33
PPTG_07368		3.49524	1.22077	0.620134	-1.55016	-2.53249	0.0065719	8.47518e-06
PPTG_02404		4.47343	17.3457	18.322	1.95948	2.01922	3.86337e-27	5.94821e-29
PPTG_02499		0.578119	1.92215	2.78706	1.74703	2.269	0.0033899	6.33844e-05
PPTG_17830		60.159	16.1196	14.6036	-1.91831	-2.07173	1.68717e-41	8.92395e-48
PPTG_23852		0.90583	3.7212	4.07308	1.95125	2.062	0.00281933	0.00136161
PPTG_19798		315.604	77.9277	80.6634	-2.02153	-1.99205	5.66067e-81	1.94402e-79
PPTG_14423		4.12901	0.642409	1.50211	-2.70401	-1.49461	2.31517e-06	0.0104026
PPTG_20302		4.02216	20.5032	14.0858	2.31755	1.75171	1.90815e-19	2.92531e-11
PPTG_03157		5.14027	1.12872	1.41564	-2.18662	-1.86449	1.35531e-05	0.000141348
PPTG_12178		2.73791	0.530889	0.849214	-2.36021	-1.73132	0.00538638	0.0351207
PPTG_22866		69.0089	17.0632	17.1852	-2.01493	-2.02997	4.34114e-32	8.54414e-33
PPTG_03335		10.3728	40.1772	45.2559	1.94608	2.10211	9.80398e-28	1.51362e-32
PPTG_22406		9.55907	38.6189	40.1721	2.00535	2.04572	2.54459e-29	1.01588e-30
PPTG_04579		0.699636	2.48141	3.18981	1.86763	2.21484	2.39076e-05	2.46503e-07
PPTG_23373		0.677717	2.56924	3.24483	1.881	2.20026	4.59332e-05	9.34284e-07
PPTG_23120		2.02772	8.01486	8.59399	1.99209	2.07872	1.14146e-17	2.45595e-19
PPTG_24079		6.3201	22.194	30.504	1.82692	2.27526	4.37132e-08	3.644e-12
PPTG_21385		21.754	86.436	95.9103	1.98087	2.11504	1.47274e-86	5.92488e-100
PPTG_04238		80.1637	338.212	332.025	2.06857	2.02622	2.08692e-62	5.72864e-60
PPTG_22057		0.650406	2.13677	3.43925	1.74868	2.40917	0.0376624	0.00208437
PPTG_25046		13.9507	3.90043	2.89118	-1.85225	-2.28646	2.16657e-09	4.63219e-13
PPTG_12342		16.9226	4.01042	4.25402	-2.09496	-2.03021	1.39432e-14	3.60811e-14
PPTG_24441		15.5319	61.5378	70.1818	1.98464	2.15722	1.28739e-39	4.32802e-47
PPTG_16217		9.14831	39.7926	38.5675	2.1119	2.05295	1.23377e-32	6.21012e-31
PPTG_23655		1.89357	9.06686	7.38697	2.24854	1.93435	2.85962e-14	1.07821e-10
PPTG_03719		0.722307	0.229782	0.125209	-1.70802	-2.57445	0.0279597	0.0012084
PPTG_04417		6.03194	26.1701	25.5848	2.12348	2.07271	2.2872e-26	3.13138e-25
PPTG_17690		7.7449	2.35611	1.36196	-1.74458	-2.53266	8.75413e-08	2.58705e-13
PPTG_22038		109.098	470.676	478.53	2.10192	2.11131	3.35321e-56	9.56846e-57
PPTG_14143		1.10654	4.46235	5.20731	2.00687	2.21179	4.24107e-13	5.92815e-16
PPTG_22638		28.4461	6.80438	6.61611	-2.08423	-2.13937	3.34515e-17	3.31441e-18
PPTG_24444		46.7712	11.4235	10.4375	-2.04417	-2.19141	1.72016e-39	1.1557e-44
PPTG_01865		2.80817	0.702829	0.612031	-2.00462	-2.2351	2.91858e-08	8.37523e-10
PPTG_12179		5.50729	1.23001	1.32115	-2.15347	-2.08444	0.0013816	0.00174628
PPTG_14393		7.13322	32.231	30.8684	2.16081	2.07919	2.00159e-28	2.0749e-26
PPTG_23959		35.2	8.81105	7.45064	-2.00303	-2.25025	9.72794e-17	2.4311e-20
PPTG_08538		1.71059	7.61725	7.6626	2.12643	2.12122	9.30315e-12	9.12231e-12
PPTG_11829		1.24618	5.10787	6.25034	1.9934	2.26807	8.21897e-12	3.18234e-15
PPTG_21638		40.1465	8.82688	9.83305	-2.2039	-2.05167	1.48011e-28	3.90315e-26
PPTG_21709		2.94629	11.3563	14.5827	1.96571	2.30028	3.58703e-08	4.95975e-11
PPTG_15583		3.72787	17.1814	16.4491	2.17251	2.09136	5.78183e-19	1.17088e-17
PPTG_24045		9.63763	37.5791	49.0423	1.95638	2.32328	1.72246e-20	4.01408e-29
PPTG_21346		4.63352	0.91045	1.17937	-2.31154	-1.97331	0.00107531	0.0042143
PPTG_16125		0.989241	3.93897	4.82594	2.00522	2.27926	2.36771e-08	1.00294e-10
PPTG_14740		0.845436	0.231688	0.153696	-1.86018	-2.45752	0.00072393	1.67776e-05
PPTG_11830		2.05976	8.51269	10.3309	2.01532	2.27792	3.06785e-14	4.30078e-18
PPTG_08075		1.17357	0.252644	0.284	-2.23334	-2.06418	0.0123995	0.0193557
PPTG_24817		0.502432	2.0463	2.8698	1.92772	2.40338	0.0252866	0.00323636
PPTG_17037		4.34012	18.9165	19.8574	2.13824	2.18417	7.97382e-13	2.03337e-13
PPTG_03761		0.151237	0.754378	0.675226	2.25526	2.07424	0.00138239	0.00362369
PPTG_24549		0.550816	2.9633	1.93168	2.49763	1.87893	0.00140309	0.0227565
PPTG_03750		0.0966554	0.421273	0.405624	2.20452	2.13021	0.033333	0.0396414
PPTG_14699		1.99512	8.8865	9.41223	2.13785	2.19867	3.84296e-09	1.05273e-09
PPTG_06723		37.2651	162.745	177.338	2.11503	2.22311	1.58781e-52	3.57504e-58
PPTG_20264		290.868	63.6132	66.9252	-2.20026	-2.14416	2.69614e-133	1.26398e-128
PPTG_12608		1.20445	0.370582	0.180733	-1.72829	-2.73854	0.0163089	0.000272734
PPTG_09378		0.193428	0.901308	0.898346	2.19026	2.16932	0.000669396	0.000733851
PPTG_14753		0.723204	3.33829	3.64458	2.12756	2.2384	0.00249483	0.00130078
PPTG_17258		0.885136	3.04048	5.19473	1.84078	2.59502	7.39561e-06	4.91955e-11
PPTG_02118		2.65097	11.7257	12.5773	2.14174	2.23184	1.15866e-07	2.7932e-08
PPTG_03723		81.2869	17.832	18.1182	-2.19702	-2.18582	4.49577e-84	1.99883e-84
PPTG_03586		0.65384	3.07958	2.90967	2.24068	2.14587	1.29554e-10	7.96068e-10
PPTG_18402		12.3813	56.4502	58.515	2.17791	2.21021	3.27209e-61	2.13805e-63
PPTG_14326		3.94452	16.9483	19.4026	2.11073	2.28562	4.51736e-20	1.22146e-23
PPTG_03934		3.12211	0.88045	0.533948	-1.86697	-2.59911	0.000807038	6.38282e-06
PPTG_24499		4.44467	18.9507	22.1896	2.10525	2.31693	5.4202e-13	9.55451e-16
PPTG_20019		2.91906	0.821716	0.485542	-1.89146	-2.60042	0.02878	0.00308326
PPTG_07739		0.192365	1.0115	0.792458	2.41014	2.04183	0.011044	0.0362348
PPTG_06331		6.99945	32.4297	34.3003	2.18863	2.25392	2.79323e-38	7.50391e-41
PPTG_17250		1.70723	8.00178	7.82426	2.24247	2.20069	3.794e-08	6.67224e-08
PPTG_07692		4.31068	0.790825	1.09866	-2.46638	-2.00218	3.67311e-21	2.03968e-15
PPTG_02669		3.34065	15.2831	16.363	2.19199	2.26853	1.31024e-20	4.09727e-22
PPTG_06933		0.323194	1.62335	1.3751	2.36294	2.10507	6.7996e-07	1.27775e-05
PPTG_01156		26.4989	5.45414	5.90128	-2.28482	-2.18394	9.13799e-22	8.92619e-21
PPTG_08508		0.415954	1.98324	1.91116	2.26863	2.2085	1.53863e-05	2.61739e-05
PPTG_21468		2.82662	12.5975	14.3632	2.15753	2.32642	1.46557e-09	4.60568e-11
PPTG_24645		2.69677	0.634914	0.485142	-2.04466	-2.46248	0.0156943	0.00393969
PPTG_24064		3.90935	16.0472	21.4732	2.05996	2.45148	8.31553e-09	3.00524e-12
PPTG_24644		3.17669	0.644834	0.66956	-2.26304	-2.23665	0.00493152	0.00484696
PPTG_09542		0.970667	0.236761	0.167224	-2.02247	-2.51544	0.0125171	0.00181827
PPTG_16014		1.12226	0.264505	0.216989	-2.13262	-2.38914	0.0168669	0.00749166
PPTG_15839		11.5942	57.2859	54.5372	2.30349	2.2162	4.57655e-64	2.07165e-59
PPTG_20075		136.689	29.0546	28.5651	-2.23873	-2.28442	1.41537e-106	6.94147e-112
PPTG_22923		46.9915	9.91532	9.69623	-2.24309	-2.30783	5.32017e-21	2.95963e-22
PPTG_23784		5.39027	1.05254	1.17902	-2.32908	-2.22318	5.27615e-06	1.02828e-05
PPTG_14956		1.89208	9.91174	8.93953	2.36672	2.19854	1.56293e-16	2.38745e-14
PPTG_24276		5.23057	24.6901	27.8333	2.20792	2.36419	6.32092e-16	2.69528e-18
PPTG_08745		76.9939	15.8807	15.8218	-2.27283	-2.30889	1.18232e-42	2.50669e-44
PPTG_18272		0.594325	0.10636	0.140064	-2.47832	-2.12491	0.0207926	0.0379438
PPTG_20742		8.67083	43.5589	43.3579	2.31525	2.29175	2.34005e-76	3.90989e-75
PPTG_06508		4.71742	0.939198	0.981002	-2.30946	-2.2997	7.18082e-11	6.11706e-11
PPTG_02869		12.3438	58.4833	65.6118	2.23477	2.37977	4.77143e-36	4.31001e-41
PPTG_22344		0.857711	3.73149	4.7278	2.15112	2.48049	0.000674352	5.83791e-05
PPTG_09870		0.693616	0.146105	0.138293	-2.28485	-2.3391	2.5703e-05	1.4175e-05
PPTG_22376		1.83729	10.1311	8.91782	2.42039	2.21645	1.40492e-08	2.53315e-07
PPTG_19833		1.30952	6.6125	6.61213	2.32811	2.30925	4.23821e-09	5.12571e-09
PPTG_04088		18.3381	88.8914	97.1889	2.26457	2.37415	3.86859e-121	1.70771e-134
PPTG_14123		16.0562	78.2687	84.433	2.27545	2.36562	1.54238e-54	2.22959e-59
PPTG_11913		0.877559	5.11777	3.81024	2.55187	2.11625	1.17159e-05	0.00038431
PPTG_24822		82.5788	16.1097	17.1208	-2.36318	-2.29277	1.26147e-84	2.29697e-82
PPTG_21127		2.74913	14.9606	13.1654	2.43143	2.22974	8.22782e-18	4.85227e-15
PPTG_21003		6.38341	33.1195	32.3262	2.35605	2.30427	1.33596e-28	1.90932e-27
PPTG_12899		4.52858	23.0772	23.3456	2.3364	2.33694	7.49584e-50	4.5471e-50
PPTG_24099		135.862	26.9684	27.5839	-2.34812	-2.32813	1.69878e-53	2.66345e-53
PPTG_22515		9.86832	47.295	52.9909	2.26741	2.41365	1.60496e-30	1.04434e-34
PPTG_20165		15.517	3.16624	3.02944	-2.29966	-2.38561	4.98304e-12	6.80629e-13
PPTG_10260		0.864655	0.156281	0.179541	-2.42618	-2.26534	0.00442588	0.00647953
PPTG_24866		5.1628	0.955638	1.07608	-2.41563	-2.27679	8.23056e-07	2.15136e-06
PPTG_13585		0.216432	1.08354	1.14473	2.32486	2.38842	3.2501e-07	1.27815e-07
PPTG_14903		4.70431	0.768008	1.10115	-2.63502	-2.12028	0.000218041	0.00211411
PPTG_00106		0.527989	2.31097	3.36158	2.11195	2.64561	0.000449321	4.2674e-06
PPTG_03408		0.465135	2.21678	2.90066	2.18888	2.55998	4.30248e-06	3.47196e-08
PPTG_05833		4.49935	0.701786	1.06723	-2.71885	-2.07417	1.58604e-05	0.000570693
PPTG_06823		0.0655817	0.305978	0.400099	2.19946	2.57042	0.0376135	0.0110279
PPTG_10444		6.49315	1.45722	1.10601	-2.19279	-2.58421	6.93548e-09	2.27249e-11
PPTG_23380		8.90685	44.7533	48.8892	2.32622	2.43858	1.21781e-34	2.34462e-38
PPTG_22943		195.319	39.1659	36.391	-2.32302	-2.45122	1.2092e-113	1.61666e-125
PPTG_16444		6.05903	1.18796	1.13931	-2.33521	-2.43966	3.8203e-09	7.16008e-10
PPTG_08604		0.896116	4.88712	4.33912	2.4873	2.29191	9.85425e-11	3.13677e-09
PPTG_02746		0.253695	1.17734	1.54289	2.22485	2.58453	0.00428116	0.000633585
PPTG_16966		27.3583	5.73924	4.70198	-2.25866	-2.55385	9.49581e-33	4.70402e-40
PPTG_03569		0.806244	4.13533	4.6434	2.34154	2.48719	6.03649e-08	5.97589e-09
PPTG_19726		23.3512	126.382	124.854	2.4323	2.39461	5.16828e-92	2.18839e-89
PPTG_21026		5.46362	30.4641	27.4946	2.50336	2.33292	6.12854e-24	7.56605e-21
PPTG_03836		0.894139	0.17536	0.16998	-2.3813	-2.45354	0.0322619	0.0254256
PPTG_07464		22.9356	4.50748	4.08886	-2.33272	-2.5047	1.55443e-16	1.19781e-18
PPTG_13925		0.442978	2.18674	2.66301	2.29032	2.55621	3.42745e-06	1.39516e-07
PPTG_06998		1.30432	7.53338	6.83473	2.50521	2.34381	3.22839e-19	6.75362e-17
PPTG_13452		3.39637	0.759681	0.524027	-2.15585	-2.7351	0.000631667	2.67141e-05
PPTG_19175		0.198459	1.36008	0.860938	2.80092	2.10552	0.000275758	0.00951728
PPTG_16531		0.359762	1.89756	1.82312	2.47744	2.40249	0.000243265	0.000384567
PPTG_22513		12.4882	66.6609	71.0945	2.40012	2.48037	4.38862e-43	3.73966e-46
PPTG_19443		3.40012	0.707265	0.570257	-2.28788	-2.60267	7.72096e-05	9.99678e-06
PPTG_10688		46.0914	255.394	252.019	2.46302	2.4282	5.86013e-108	4.99585e-105
PPTG_23531		0.897236	0.185471	0.141932	-2.26706	-2.63908	0.00634569	0.00176826
PPTG_17326		3.37914	0.669081	0.575864	-2.31963	-2.59013	1.00505e-05	1.1089e-06
PPTG_00719		0.877621	0.135776	0.189234	-2.692	-2.23407	0.000344074	0.00170107
PPTG_12938		3.6499	0.810098	0.562228	-2.20275	-2.73817	1.37376e-05	8.76787e-08
PPTG_07985		1.32117	0.247069	0.239354	-2.41644	-2.49848	0.0205029	0.0155257
PPTG_22642		2.50103	13.1655	14.4278	2.40392	2.51814	9.16337e-14	3.62002e-15
PPTG_02964		0.864214	5.12806	4.8798	2.50946	2.42303	4.35471e-12	2.39732e-11
PPTG_22669		6.00398	1.03922	1.17678	-2.57538	-2.36264	6.81998e-05	0.000203348
PPTG_16083		4.61788	25.2262	27.8309	2.40567	2.53211	1.38728e-34	1.2687e-38
PPTG_07367		2.56887	0.354561	0.631699	-2.93745	-2.07483	0.0011289	0.0181316
PPTG_07700		20.987	4.41454	3.35394	-2.2858	-2.67406	1.71498e-12	5.55259e-16
PPTG_04515		15.5231	2.64768	3.00953	-2.54846	-2.39855	1.32521e-13	8.05266e-13
PPTG_22234		6.29481	32.6385	37.3656	2.39589	2.57188	1.94426e-29	3.19464e-34
PPTG_07751		0.155851	0.920698	0.907605	2.51003	2.45791	0.00182338	0.0022723
PPTG_24100		61.9636	9.7931	12.5637	-2.6695	-2.32556	5.3699e-31	5.01789e-25
PPTG_08553		0.53852	0.0958847	0.096826	-2.46968	-2.52229	0.0348995	0.0287564
PPTG_04488		78.9509	13.9733	14.2607	-2.50743	-2.49269	1.25852e-62	2.95422e-63
PPTG_12973		16.6865	3.19673	2.73002	-2.3933	-2.62929	1.11939e-29	1.30262e-34
PPTG_03784		0.155814	0.711455	0.948882	2.32506	2.7157	0.0299067	0.0083215
PPTG_20500		3.31006	0.483029	0.677643	-2.77709	-2.28392	0.000168829	0.00131465
PPTG_06834		4.69286	26.9056	26.4384	2.5432	2.49708	1.45452e-20	6.77579e-20
PPTG_03825		10.7013	39.5146	115.801	1.87191	3.40218	8.7017e-24	1.25462e-80
PPTG_20661		1.28411	7.02314	7.81168	2.46291	2.60397	3.76706e-13	8.81132e-15
PPTG_13803		0.660425	3.59055	4.19371	2.43165	2.64189	1.84227e-09	3.62846e-11
PPTG_20275		2.5517	0.404431	0.469276	-2.64238	-2.43474	0.00814292	0.0121783
PPTG_24119		0.312312	2.23735	1.8006	2.70484	2.3798	0.00735523	0.0211318
PPTG_10582		0.293552	1.83809	1.37543	2.7644	2.32987	0.00375193	0.0179607
PPTG_06500		0.634732	3.11805	4.56821	2.28483	2.82164	9.86582e-06	1.85679e-08
PPTG_23581		11.2899	63.9511	69.1885	2.49156	2.58798	8.22252e-79	9.83547e-86
PPTG_22928		5.6547	34.0135	32.6351	2.58043	2.50129	6.48509e-44	2.38312e-41
PPTG_13398		1.34416	0.214824	0.258309	-2.66884	-2.41941	0.0244065	0.0371907
PPTG_10499		6.60441	39.1754	38.753	2.5602	2.52867	6.3226e-48	6.32571e-47
PPTG_06857		1.24509	0.276816	0.163034	-2.19173	-2.95827	0.000955519	1.59659e-05
PPTG_00540		1.09477	6.61627	7.02817	2.52949	2.59202	5.36153e-08	2.09321e-08
PPTG_01866		1.91709	0.338554	0.333727	-2.53688	-2.59121	0.0195462	0.0160835
PPTG_23918		17.3509	99.3267	107.297	2.52289	2.61436	2.72891e-94	4.13743e-102
PPTG_12966		1.0227	6.95435	5.66907	2.73696	2.4309	7.97095e-08	2.61871e-06
PPTG_10840		0.898903	0.207328	0.0984955	-2.09921	-3.17681	0.00613445	0.000142589
PPTG_07417		0.467712	0.0652027	0.0961637	-2.86408	-2.34069	0.0041545	0.0123199
PPTG_03844		0.929672	0.164473	0.143184	-2.51491	-2.67288	0.0337544	0.0230722
PPTG_21072		0.719935	4.67985	3.87551	2.74877	2.44801	1.19785e-05	0.000125411
PPTG_22438		0.58231	3.22209	3.89309	2.47815	2.72529	0.000334594	5.68128e-05
PPTG_22184		24.9321	4.32089	4.06357	-2.55762	-2.65456	4.60547e-18	2.27779e-19
PPTG_11712		5.43721	0.619414	1.24146	-3.13489	-2.17259	1.65688e-10	9.98607e-07
PPTG_24775		0.427234	2.77287	2.80424	2.61809	2.60599	0.00206854	0.00211731
PPTG_24407		15.5759	95.3862	96.9105	2.61235	2.61936	1.78536e-61	5.72527e-62
PPTG_12205		15.8551	89.7308	111.411	2.47197	2.77022	4.35068e-62	6.87988e-79
PPTG_05729		0.228103	1.1141	1.90893	2.26575	3.02832	0.0106869	0.000276257
PPTG_22167		2.55408	14.9948	16.5941	2.55803	2.68279	6.55446e-39	3.62736e-43
PPTG_12180		1.39261	0.186546	0.273606	-2.93409	-2.37298	0.0119325	0.0306956
PPTG_20721		3.84922	0.733075	0.511471	-2.38269	-2.92238	0.000473694	3.51044e-05
PPTG_01205		1.62182	0.282968	0.242302	-2.52863	-2.76316	1.47003e-06	2.19247e-07
PPTG_23086		0.384344	2.8843	2.37756	2.79983	2.5006	0.000148243	0.000869954
PPTG_08873		3.20628	20.8667	20.0775	2.6804	2.61203	2.83148e-23	3.4595e-22
PPTG_20484		8.00738	52.8294	50.493	2.68831	2.60952	2.38094e-53	2.36462e-50
PPTG_20623		23.6043	4.34171	3.27637	-2.44811	-2.86947	4.99481e-19	8.05637e-24
PPTG_22045		6.26453	38.2935	40.4078	2.62107	2.68125	5.60687e-88	9.39997e-93
PPTG_19007		4.88783	0.89015	0.698684	-2.48707	-2.82782	2.44023e-08	6.4758e-10
PPTG_24376		18.1388	3.94701	2.06148	-2.22419	-3.16687	4.48088e-08	1.5659e-13
PPTG_21639		17.3631	2.76367	2.82043	-2.67211	-2.63762	2.62861e-19	2.2724e-19
PPTG_20881		2.59556	15.5841	17.0365	2.60151	2.72082	2.56087e-14	1.00446e-15
PPTG_11522		1.57835	10.2743	10.1472	2.68712	2.65105	1.57597e-13	3.0519e-13
PPTG_07833		3.77239	24.9681	24.1933	2.7048	2.64881	1.85065e-22	1.31033e-21
PPTG_01393		0.198849	1.35098	1.44308	2.65073	2.72627	8.9908e-07	3.74353e-07
PPTG_08690		28.5413	4.12371	4.72938	-2.78363	-2.61613	3.88099e-22	2.04344e-20
PPTG_19006		0.944171	0.15544	0.13093	-2.57253	-2.83122	0.00650315	0.00298367
PPTG_15823		0.898682	6.5726	5.22184	2.88694	2.52985	3.18962e-08	1.80669e-06
PPTG_23194		1.87982	12.7766	12.0768	2.75752	2.65423	3.16737e-13	2.47938e-12
PPTG_24856		23.8055	4.24718	3.11477	-2.49403	-2.9502	6.5175e-19	6.4709e-24
PPTG_14653		3.32673	24.2228	20.9954	2.82932	2.60678	9.85448e-59	7.76108e-50
PPTG_17500		469.599	71.2349	72.6171	-2.7291	-2.71998	1.12656e-255	1.1537e-256
PPTG_20718		11.8879	84.2174	75.0989	2.82351	2.64394	5.24171e-54	2.33165e-47
PPTG_14122		11.0651	74.0677	76.2858	2.71917	2.74715	4.21853e-57	1.83527e-58
PPTG_03785		0.509216	3.08504	3.39198	2.67572	2.79818	8.21038e-05	3.14244e-05
PPTG_21779		1.93457	11.7367	13.8922	2.62896	2.84871	7.76784e-13	4.0215e-15
PPTG_03846		1.25681	0.251089	0.137181	-2.33819	-3.2054	0.00767013	0.000606389
PPTG_09057		0.281944	2.56066	1.69367	3.05842	2.45678	4.04264e-05	0.00140988
PPTG_11845		17.993	2.74476	2.67965	-2.71427	-2.77012	4.09053e-60	5.17381e-63
PPTG_09106		1.52676	10.2626	10.0045	2.77235	2.71406	3.02517e-22	2.10279e-21
PPTG_04156		0.413064	2.79019	3.00986	2.70045	2.7877	2.92683e-06	1.16537e-06
PPTG_01080		2.1707	0.363081	0.271437	-2.55669	-2.9484	0.00898702	0.00282744
PPTG_21375		4.75847	33.6415	32.0526	2.79441	2.71184	4.54519e-34	3.64872e-32
PPTG_07880		0.194235	1.27779	1.09671	2.87558	2.64089	0.0273228	0.0453174
PPTG_23656		1.36564	9.9645	8.63949	2.8647	2.65495	1.97002e-05	8.70885e-05
PPTG_23750		4.17753	27.3761	29.9509	2.70481	2.81663	1.94933e-31	2.43689e-34
PPTG_14503		5.1588	0.704273	0.822831	-2.85317	-2.67513	3.89128e-09	1.4643e-08
PPTG_08687		13.0933	1.73694	2.13572	-2.88034	-2.65473	7.14889e-10	5.28529e-09
PPTG_08688		34.2714	5.23678	4.88898	-2.70576	-2.84778	2.22412e-20	2.64696e-22
PPTG_04122		3.27114	0.362169	0.629752	-3.24705	-2.38394	0.000156573	0.00249036
PPTG_01168		0.93418	0.168761	0.11576	-2.5204	-3.07995	0.0465019	0.0152371
PPTG_19936		7.84124	0.937094	1.38123	-3.08185	-2.52405	2.14028e-08	8.61269e-07
PPTG_07817		0.770815	0.0606556	0.181498	-3.6577	-2.1285	0.0038664	0.0431358
PPTG_05674		0.348973	0.0336298	0.0752397	-3.50369	-2.23256	0.00538042	0.0367513
PPTG_23905		5.88466	39.7085	42.9305	2.75075	2.84748	4.36508e-42	2.37361e-45
PPTG_08685		53.5985	7.34165	8.18825	-2.86957	-2.73481	5.60747e-37	4.28362e-35
PPTG_20225		7.73634	0.886411	1.38123	-3.14157	-2.50452	1.01447e-08	6.86722e-07
PPTG_20462		3.42013	24.7265	22.9279	2.87023	2.74952	2.79916e-28	5.28752e-26
PPTG_24552		10.6833	76.7764	76.603	2.822	2.80067	5.35238e-77	4.09229e-76
PPTG_04558		1.16629	0.141913	0.194845	-3.0408	-2.60368	0.000600316	0.00169123
PPTG_24842		178.776	25.1634	26.1105	-2.83672	-2.79695	2.0055e-148	2.65406e-149
PPTG_00641		3.86063	0.642062	0.478881	-2.60869	-3.04329	1.03754e-17	3.66272e-22
PPTG_08757		0.183826	0.957563	2.05699	2.32705	3.41381	0.0219278	0.000263206
PPTG_05353		0.321416	1.48023	3.41811	2.28994	3.4704	0.0144232	7.23835e-05
PPTG_24077		0.762287	6.20733	4.39694	3.08957	2.57503	1.68717e-08	4.36282e-06
PPTG_20670		7.99547	1.10252	1.22995	-2.90402	-2.74425	4.10248e-06	8.44408e-06
PPTG_18976		0.123366	1.57657	0.7059	3.47205	2.29705	6.93307e-05	0.0141839
PPTG_14683		1.35775	10.0569	9.25178	2.8978	2.75926	4.45245e-14	7.64305e-13
PPTG_03392		4.48188	31.3608	31.7904	2.82945	2.82841	6.55519e-38	4.99879e-38
PPTG_16761		0.134358	0.88312	1.03103	2.72726	2.93716	0.0253461	0.0137152
PPTG_08689		45.9292	6.68422	6.27959	-2.76971	-2.898	8.64425e-26	5.31827e-28
PPTG_13332		38.2796	280.557	275.809	2.8636	2.82492	1.44847e-43	1.9404e-42
PPTG_09322		0.200101	1.34792	1.36862	2.84544	2.85633	2.92095e-06	2.49672e-06
PPTG_01887		3.08076	0.236988	0.658969	-3.67951	-2.21388	8.02344e-06	0.00206809
PPTG_17946		1.89673	0.301974	0.241986	-2.71819	-3.00945	0.00175591	0.000633095
PPTG_22235		5.50769	38.9558	42.8722	2.81045	2.92809	6.48374e-46	3.23565e-50
PPTG_21513		27.2155	189.605	214.5	2.79078	2.95484	9.96329e-24	1.56839e-26
PPTG_15842		1.16423	8.16117	8.4769	2.85714	2.88656	7.73784e-09	4.73175e-09
PPTG_02250		35.5486	4.44354	5.28294	-2.9932	-2.76788	6.52466e-97	1.98007e-88
PPTG_24343		8.8629	60.4463	69.9374	2.78534	2.9763	2.25175e-46	3.83331e-53
PPTG_01848		0.146364	0.820849	1.19759	2.62913	3.16225	0.0442014	0.0113294
PPTG_24336		1.20101	0.119181	0.200152	-3.19381	-2.60644	0.0166906	0.036437
PPTG_10009		4.76898	34.9378	36.5565	2.86425	2.91509	3.79804e-35	1.42059e-36
PPTG_20077		36.352	269.086	276.517	2.87946	2.90296	1.60587e-168	1.39525e-171
PPTG_16218		31.0983	232.824	239.573	2.89652	2.92195	7.27176e-175	3.06936e-178
PPTG_16954		54.8771	6.28809	8.51388	-3.13384	-2.72011	5.19451e-70	1.45944e-59
PPTG_18732		0.164252	1.24227	1.23268	2.93448	2.90819	3.97149e-05	4.54161e-05
PPTG_05128		3.61446	27.2668	28.6642	2.89698	2.95619	1.82598e-31	6.30744e-33
PPTG_02745		3.99847	28.3118	32.8708	2.83805	3.03465	5.46722e-35	2.24754e-40
PPTG_19723		1.54351	13.4725	11.1367	3.08715	2.79709	2.54809e-22	2.43206e-18
PPTG_13799		0.0925396	0.721495	0.604571	3.08484	2.79943	0.00576069	0.0137084
PPTG_23202		11.1518	81.6349	90.8978	2.87488	3.00932	7.47948e-85	9.64334e-94
PPTG_12937		3.85181	0.546267	0.462361	-2.82013	-3.07103	1.51723e-10	6.21878e-12
PPTG_05889		1.16497	9.3484	8.77548	2.99665	2.89213	2.28282e-11	1.15502e-10
PPTG_13320		2.57346	17.1515	23.1663	2.74358	3.16024	3.58915e-18	4.87445e-24
PPTG_17501		571.076	74.9769	74.9403	-2.93746	-2.95545	0	0
PPTG_23924		1431.95	198.08	178.441	-2.86431	-3.03103	5.43406e-269	6.523e-300
PPTG_23477		0.372554	4.00579	2.13668	3.44714	2.52053	1.73076e-08	8.43277e-05
PPTG_14054		0.655452	5.16981	4.45634	3.06677	2.83844	3.17028e-07	2.71273e-06
PPTG_05109		0.701634	6.51173	5.36109	3.1126	2.81164	8.32881e-09	2.60473e-07
PPTG_08060		1.03857	0.135349	0.12135	-2.90651	-3.05001	0.0422402	0.0313586
PPTG_19774		1.31013	9.89728	11.4052	2.88771	3.07109	9.13621e-14	1.19288e-15
PPTG_15278		5.42991	40.8559	44.282	2.93172	3.03145	3.37545e-32	1.42259e-34
PPTG_06326		7.51478	60.2969	57.7791	3.02749	2.94466	7.78162e-51	3.76512e-48
PPTG_21867		4.54948	37.5677	37.1983	3.00786	2.9749	6.40127e-42	4.0194e-41
PPTG_20326		777.191	100.307	96.7569	-2.95994	-3.03222	0	0
PPTG_05083		1.92956	0.297552	0.195371	-2.692	-3.33954	0.00215314	0.00035887
PPTG_14416		0.928403	0.135724	0.101018	-2.76919	-3.25069	0.000590751	9.76557e-05
PPTG_22845		4.39665	36.2896	36.9392	2.99826	3.00575	2.29176e-58	7.50418e-59
PPTG_08735		1.00518	8.361	7.75584	3.06781	2.94606	3.85577e-16	5.81166e-15
PPTG_03883		2.3513	20.1304	19.3033	3.04396	2.97054	1.07683e-23	1.21966e-22
PPTG_09392		0.205336	1.77601	1.63266	3.07319	2.94625	0.000223539	0.000428938
PPTG_13258		0.414917	0.0598562	0.0408807	-2.76144	-3.28346	0.00600627	0.00166291
PPTG_02017		3.97052	0.38528	0.615823	-3.34047	-2.71777	4.86318e-08	1.00617e-06
PPTG_25000		12.9356	1.68655	1.57161	-2.97806	-3.055	1.15319e-08	4.2057e-09
PPTG_21503		1.69868	14.824	13.305	3.11912	2.94389	1.4496e-27	1.35072e-24
PPTG_05116		28.5331	233.25	237.451	3.02669	3.03679	1.18249e-102	1.56402e-103
PPTG_22054		4.49751	36.6142	37.6491	3.02208	3.04701	1.30413e-34	2.43778e-35
PPTG_10261		0.678156	0.0687194	0.0932516	-3.2211	-2.86747	0.0195462	0.0260656
PPTG_20327		771.224	96.4437	93.0894	-3.00554	-3.07677	0	0
PPTG_21933		5.71033	44.5067	49.8691	2.97111	3.11712	1.75831e-61	3.82231e-68
PPTG_18368		1.31342	0.0940898	0.228721	-3.6994	-2.51089	0.000471749	0.00679256
PPTG_03337		28.9073	2.94948	4.16816	-3.30066	-2.81771	6.34412e-37	2.98226e-31
PPTG_19033		2.02934	16.7153	19.0931	2.96369	3.14084	5.17507e-17	3.63079e-19
PPTG_09130		0.845134	6.02822	7.86663	2.87479	3.23961	4.51083e-13	1.23382e-16
PPTG_08692		205.595	24.9332	24.9242	-3.05454	-3.07042	1.04337e-213	1.68694e-219
PPTG_24241		54.8276	7.23709	6.07698	-2.9305	-3.20224	1.13894e-104	6.30271e-120
PPTG_22819		41.8515	5.00076	5.08337	-3.0773	-3.06568	1.86478e-36	3.88752e-37
PPTG_23513		1.09204	7.9944	9.82226	2.93782	3.21419	3.67288e-12	1.35731e-14
PPTG_11592		0.0469357	0.419026	0.534351	2.91638	3.24039	0.0247377	0.0101072
PPTG_22340		3.60275	31.0466	30.3467	3.10244	3.05091	7.82287e-64	7.2508e-62
PPTG_07933		0.967198	8.22432	9.18595	3.00666	3.15565	3.60412e-13	1.58471e-14
PPTG_22297		141.785	17.6969	16.3578	-3.02233	-3.14161	1.37284e-116	5.33469e-125
PPTG_14947		0.286592	2.51152	2.96434	2.97655	3.20344	0.000578194	0.000164756
PPTG_18334		2.55158	21.1976	22.5586	3.05588	3.12398	1.23377e-32	2.91616e-34
PPTG_18365		0.652095	5.78826	5.54817	3.13478	3.05282	1.5801e-12	6.01597e-12
PPTG_17899		0.844803	0.159745	0.0510459	-2.37496	-4.02975	0.0454578	0.00607331
PPTG_08554		0.436262	0.0502435	0.0512561	-3.08159	-3.1413	0.0402728	0.0339814
PPTG_07777		1.29721	0.162004	0.145991	-3.04666	-3.17989	0.00916831	0.0063116
PPTG_00169		1.18046	0.19082	0.101757	-2.69811	-3.61509	0.0155106	0.00269368
PPTG_05115		9.7049	79.7668	88.9405	3.05622	3.19315	3.03934e-47	1.24934e-51
PPTG_08691		91.1158	11.4116	9.87036	-3.01564	-3.23652	6.66409e-127	1.48085e-142
PPTG_23204		3.36515	30.7773	29.8056	3.17002	3.10915	1.66099e-35	2.94672e-34
PPTG_20669		5.29297	0.536949	0.699985	-3.34501	-2.94756	1.43662e-07	6.70969e-07
PPTG_17104		42.0222	366.531	383.321	3.11776	3.16893	2.52528e-43	9.24741e-45
PPTG_12038		5.35826	0.668502	0.574112	-3.02369	-3.27522	4.52889e-09	4.10028e-10
PPTG_07615		18.8851	162.129	174.289	3.10643	3.19619	2.43415e-96	3.11646e-102
PPTG_22598		1.78036	0.244696	0.16291	-2.88687	-3.45451	0.000426864	5.95991e-05
PPTG_24579		21.7943	2.27276	2.67348	-3.27137	-3.06293	8.94454e-23	8.37918e-22
PPTG_20750		0.112242	0.993777	1.03344	3.14756	3.18832	0.0138098	0.0120629
PPTG_23696		4.22649	38.7117	40.4548	3.16222	3.20344	2.97191e-46	1.12105e-47
PPTG_18093		0.197905	1.92644	1.79451	3.23863	3.12809	9.74619e-10	3.72635e-09
PPTG_02741		3.82864	41.8394	30.0238	3.44791	2.95087	9.4757e-35	1.66594e-25
PPTG_03236		0.148048	2.24812	1.11669	3.74233	2.72053	0.000165643	0.00970568
PPTG_20992		2.35086	20.4009	23.0747	3.10968	3.27738	2.16679e-20	9.1046e-23
PPTG_13521		674.675	73.1425	76.0396	-3.21356	-3.1755	0	0
PPTG_23658		3.01211	0.409036	0.251683	-2.8539	-3.58962	3.39959e-07	4.96584e-09
PPTG_07717		588.651	61.3534	66.8308	-3.26742	-3.1646	0	5.12658e-304
PPTG_23050		0.279601	3.25039	2.46195	3.4287	3.02487	7.25476e-05	0.000600991
PPTG_00784		0.813525	6.81132	8.56537	3.07557	3.38573	2.93653e-31	2.95737e-38
PPTG_11099		1.29666	13.1244	11.5513	3.32973	3.12924	6.7199e-17	5.44176e-15
PPTG_04812		0.155915	1.36781	1.41311	3.23793	3.25054	0.000198265	0.000178238
PPTG_18476		1.44699	0.204751	0.11749	-2.85645	-3.69078	0.0217708	0.00614567
PPTG_23992		20.0403	2.27202	2.03278	-3.15038	-3.34835	2.22588e-14	8.14942e-16
PPTG_18927		1.99916	18.4702	19.9077	3.22577	3.31894	1.08294e-34	6.84803e-37
PPTG_07247		4.36418	42.6594	42.8145	3.27771	3.26649	7.77406e-55	1.29734e-54
PPTG_22053		5.43441	52.4984	51.5973	3.29348	3.25441	1.03418e-52	1.41015e-51
PPTG_03038		1.66092	17.8177	14.8434	3.41645	3.14023	1.96221e-37	1.40947e-31
PPTG_14667		1.15736	0.135421	0.104438	-3.08282	-3.48194	1.14603e-08	6.0192e-10
PPTG_24015		2.49637	0.383748	0.176446	-2.73966	-3.92738	0.000520273	1.16299e-05
PPTG_03420		20.4733	2.08103	2.13624	-3.31019	-3.26814	1.34551e-27	1.12531e-27
PPTG_23976		2.07528	20.9046	21.1785	3.30335	3.30543	2.97572e-34	1.9494e-34
PPTG_08637		0.266756	2.42332	2.56062	3.2965	3.36011	1.52332e-06	8.44098e-07
PPTG_11867		3.59701	0.516069	0.257446	-2.83781	-3.90804	0.000520273	1.86417e-05
PPTG_21392		0.14869	1.36305	1.45282	3.3015	3.36061	0.00587567	0.0047111
PPTG_04123		7.31369	0.655205	0.81873	-3.49944	-3.18002	5.05737e-08	1.49535e-07
PPTG_05865		17.774	1.67344	1.89294	-3.42027	-3.25526	5.73208e-47	3.31993e-46
PPTG_21870		4.69914	0.361078	0.597756	-3.7411	-2.9781	8.04114e-08	5.20059e-06
PPTG_20672		9.94104	0.812587	1.2215	-3.6389	-3.06841	1.19091e-14	1.46544e-12
PPTG_07513		28.3843	2.39677	3.26224	-3.56126	-3.13914	1.75024e-40	1.73319e-36
PPTG_07918		0.101888	1.21899	0.882157	3.60974	3.10996	0.0129506	0.0373175
PPTG_07422		0.857996	0.0490214	0.141268	-4.24355	-2.64749	6.61908e-05	0.00254918
PPTG_17103		12.5241	125.615	134.741	3.32003	3.40806	5.95413e-71	7.31255e-75
PPTG_23657		0.309696	3.25528	3.26759	3.37664	3.37173	3.10103e-12	2.98973e-12
PPTG_00099		1.89173	0.160433	0.201179	-3.52112	-3.23624	1.61037e-05	2.501e-05
PPTG_23048		8.4351	0.601906	1.05826	-3.76696	-3.02944	2.55481e-12	1.66605e-10
PPTG_00151		2.02216	20.7185	21.3803	3.37723	3.40013	1.71022e-24	6.46245e-25
PPTG_20369		1.5939	17.4737	17.3175	3.41422	3.38247	4.09557e-24	9.5386e-24
PPTG_14411		0.166899	1.46339	2.11233	3.15447	3.67054	2.80479e-05	5.92376e-07
PPTG_13023		0.773373	8.28213	8.42053	3.40328	3.41151	1.38936e-17	1.00119e-17
PPTG_18498		38.2906	3.09327	4.19561	-3.65369	-3.22825	2.33994e-55	8.56582e-49
PPTG_22702		3.81471	38.6644	44.4746	3.34653	3.53073	1.10526e-88	1.73632e-99
PPTG_13927		6.71193	71.3478	74.4684	3.41749	3.46249	1.64973e-87	3.81323e-90
PPTG_17136		0.332612	3.64502	3.52503	3.47008	3.41847	0.00116603	0.00137781
PPTG_23376		2.62375	29.809	28.0831	3.49757	3.39458	5.1745e-39	8.35379e-37
PPTG_20663		0.3918	5.84	3.0367	3.9658	2.99491	4.99568e-10	5.53408e-06
PPTG_01179		0.644173	0.0459718	0.0754082	-3.90951	-3.08882	0.023312	0.0470556
PPTG_22985		0.405265	4.40797	4.70452	3.44266	3.50895	2.24898e-07	1.13192e-07
PPTG_11238		0.292962	3.02979	3.81973	3.32513	3.64146	7.86832e-12	3.41901e-14
PPTG_00416		0.0951025	0.84029	1.68557	3.02615	4.03024	0.0037623	4.51795e-05
PPTG_14292		3.69478	0.287544	0.39096	-3.70762	-3.29113	6.98332e-11	4.83516e-10
PPTG_04557		0.689202	0.0376329	0.0822676	-4.00335	-3.04844	0.0117077	0.0248023
PPTG_24993		0.193932	2.26387	2.45103	3.45099	3.54583	0.000962638	0.00062977
PPTG_03554		0.148283	0.0146091	0.0135546	-3.46347	-3.5604	0.049606	0.0418357
PPTG_24911		3.1383	35.4531	35.0138	3.53445	3.49481	3.72262e-38	2.14373e-37
PPTG_16530		0.175057	2.0132	1.8734	3.57587	3.45775	5.32591e-06	1.13739e-05
PPTG_21342		0.8353	9.89845	9.13057	3.58453	3.45153	4.04217e-26	2.95477e-24
PPTG_19871		2.96671	0.241399	0.272291	-3.64922	-3.402	0.000350131	0.000522694
PPTG_02605		0.667055	0.047097	0.0772538	-3.93867	-3.15973	0.00761994	0.0245118
PPTG_17113		0.269059	0.0264323	0.0234169	-3.47168	-3.59667	0.0472036	0.0388837
PPTG_22152		0.399355	3.43411	6.98042	3.07413	4.08604	6.20463e-05	2.94608e-08
PPTG_20648		3.51245	43.401	42.817	3.57323	3.53439	3.27107e-40	1.98367e-39
PPTG_06325		3.57588	46.7379	43.6945	3.63144	3.51636	8.05581e-55	1.9893e-51
PPTG_24141		0.512117	6.47547	5.67832	3.6807	3.48022	1.26199e-12	2.31979e-11
PPTG_14053		0.503283	5.50584	5.7704	3.55348	3.60974	1.57095e-09	7.43463e-10
PPTG_03220		0.0744178	0.847832	0.911174	3.543	3.62391	0.00200632	0.00145603
PPTG_24607		1.52235	17.9702	17.0129	3.63429	3.53672	3.96644e-20	4.0888e-19
PPTG_08266		1.14692	14.0986	13.9703	3.60179	3.57296	2.43261e-30	6.09295e-30
PPTG_23653		1.62217	20.5763	17.3157	3.72412	3.45914	1.04465e-25	3.1215e-22
PPTG_02090		0.0923823	0.884499	1.38756	3.28314	3.92488	0.000773658	3.17353e-05
PPTG_05570		0.381321	0.0214488	0.0481299	-4.26098	-3.03307	0.00230309	0.00615186
PPTG_15543		0.174511	2.26433	2.32906	3.59391	3.61505	8.45218e-08	6.52154e-08
PPTG_12363		0.179135	2.76731	1.86969	3.90307	3.33287	7.63339e-08	6.64096e-06
PPTG_23575		2.07479	24.0364	27.3793	3.52295	3.69682	9.58273e-33	2.87188e-36
PPTG_05533		0.0428719	0.538636	0.599145	3.55927	3.67904	0.0122834	0.0088254
PPTG_03114		0.162722	1.66056	2.14728	3.45174	3.79775	2.0159e-06	1.0944e-07
PPTG_18163		1.598	23.4182	18.1755	3.81816	3.43838	1.0686e-22	1.67924e-18
PPTG_24342		4.29762	45.5509	60.3586	3.44119	3.82525	3.98311e-46	1.53328e-57
PPTG_14944		0.719595	4.84099	18.7173	2.79411	4.7176	1.61173e-07	8.59458e-21
PPTG_08540		4.68491	0.215942	0.598105	-4.44899	-2.96886	7.68624e-08	7.7105e-06
PPTG_03741		2.62793	33.1199	34.3196	3.62178	3.65656	9.7226e-42	1.04095e-42
PPTG_22654		6.34791	77.7282	84.3119	3.58925	3.69054	2.00206e-119	5.1464e-127
PPTG_13024		0.0343396	0.611182	0.430481	3.92263	3.38212	0.00952734	0.029381
PPTG_07096		2.21227	26.861	28.8679	3.60916	3.69722	2.60659e-50	4.63582e-53
PPTG_13758		2.74674	35.8068	34.1998	3.69915	3.61769	5.73255e-50	7.63927e-48
PPTG_13747		2.7522	33.4889	35.149	3.63215	3.68571	1.43569e-43	4.75926e-45
PPTG_05860		6.44188	0.361127	0.687966	-4.14006	-3.23484	1.56244e-12	1.03731e-10
PPTG_02098		1.17012	0.0874119	0.116722	-3.90105	-3.43394	0.0234299	0.0315503
PPTG_20662		0.577003	8.07538	7.54434	3.7155	3.60882	1.08831e-14	6.37273e-14
PPTG_24202		0.40896	5.02447	6.02268	3.54612	3.78779	7.60312e-09	4.59494e-10
PPTG_24501		1.91301	24.2727	24.2724	3.68251	3.66466	1.88887e-50	4.39445e-50
PPTG_15162		0.0622209	0.786032	0.768597	3.7144	3.63698	0.0126295	0.0145823
PPTG_24083		0.493966	0.052547	0.0282805	-3.3071	-4.09043	0.0497524	0.0228372
PPTG_09370		0.467895	5.90858	5.34741	3.77182	3.60916	1.43927e-10	9.46506e-10
PPTG_22150		2.29841	30.9376	30.2292	3.72041	3.66414	3.53563e-40	4.76202e-39
PPTG_21326		0.461764	0.0409804	0.0368326	-3.63054	-3.7643	0.0499229	0.0412645
PPTG_03688		0.979095	0.0882541	0.07147	-3.55414	-3.86886	0.000101847	3.86884e-05
PPTG_06622		0.0804216	1.03075	1.59952	3.42261	4.04291	0.0218652	0.00476874
PPTG_17437		0.0198924	0.405608	0.305309	3.94139	3.51159	0.0246284	0.0499716
PPTG_12369		0.113537	2.0159	1.3759	4.01854	3.45101	2.99567e-11	1.8666e-08
PPTG_19309		1.31169	0.0876696	0.101877	-3.80393	-3.64631	0.0181841	0.0214142
PPTG_23963		285.451	23.2568	20.5076	-3.62514	-3.82746	2.0461e-243	4.27506e-264
PPTG_24571		0.776596	11.9473	11.0388	3.80973	3.67287	2.89307e-14	2.51677e-13
PPTG_05834		2.11787	0.166041	0.153925	-3.69762	-3.79962	2.56554e-05	1.50617e-05
PPTG_02091		0.146338	1.81134	2.54209	3.51742	4.0057	0.000373803	3.30072e-05
PPTG_14290		0.4252	5.29553	7.45792	3.53962	4.00113	1.31252e-07	1.33825e-09
PPTG_12491		0.200191	2.88918	2.79304	3.79658	3.73079	4.26344e-37	6.65871e-36
PPTG_08719		1.11322	0.147946	0.0282198	-2.83709	-5.06072	0.0372336	0.00269797
PPTG_10166		0.0309085	0.470006	0.544596	3.69258	3.89165	0.0211819	0.0135649
PPTG_21627		1.53273	21.5138	21.3375	3.80954	3.7809	8.24716e-38	2.38554e-37
PPTG_07494		0.059987	0.810724	0.966518	3.67746	3.91882	0.00128347	0.000502703
PPTG_03841		50.4073	711.639	712.25	3.81081	3.79675	0	0
PPTG_06344		0.316601	3.20149	6.26602	3.36133	4.30523	0.000115789	3.45939e-07
PPTG_23414		10.8962	149.916	154.643	3.79056	3.81914	1.30538e-135	5.18596e-138
PPTG_11386		2.10657	0.479953	0	-2.13967	-6.76773	0.0313443	5.68435e-06
PPTG_23697		2.95467	41.0699	42.2507	3.79606	3.81904	9.00977e-123	9.72929e-125
PPTG_16262		4.6882	66.3758	68.5708	3.79658	3.82604	2.13946e-74	9.49529e-76
PPTG_23834		0.784635	0.0265687	0.0950648	-4.81894	-3.03146	0.00354503	0.022171
PPTG_01091		0.0914955	0.00682331	0.00580083	-3.75064	-3.89589	0.0343717	0.0276969
PPTG_10677		0.086022	1.05374	1.1881	3.76087	3.91577	0.00670958	0.00428704
PPTG_21637		1.51637	21.8282	23.6607	3.79651	3.8957	1.87832e-29	3.71523e-31
PPTG_07874		4.10023	54.6422	66.1637	3.71898	3.97731	2.40556e-72	2.2495e-83
PPTG_23902		0.0310939	0.640305	0.570456	3.94741	3.74999	0.0232797	0.0318454
PPTG_22535		19.2423	286.198	276.353	3.8827	3.81768	3.98536e-158	5.62845e-153
PPTG_24169		0.261777	3.67808	3.6209	3.86835	3.84198	1.61442e-05	1.80575e-05
PPTG_22536		18.884	277.498	277.368	3.86656	3.85191	4.08784e-141	3.22132e-140
PPTG_06209		2.85789	42.013	42.6214	3.86241	3.86741	3.17637e-70	1.45339e-70
PPTG_15807		0.0230019	0.383882	0.545465	3.62646	4.12743	0.0363234	0.0133817
PPTG_10678		0.0976131	1.23547	1.19093	3.89941	3.83876	0.00449255	0.00513069
PPTG_21259		0.158545	2.27704	2.13054	3.92403	3.82339	3.48348e-05	5.70387e-05
PPTG_24076		0.263236	3.12133	3.72106	3.76142	3.99775	4.91243e-05	1.25988e-05
PPTG_09410		0.107029	1.25512	1.7674	3.6526	4.12678	4.10123e-06	1.16187e-07
PPTG_10654		0.103273	1.4938	1.55009	3.86087	3.90706	0.00456486	0.00389307
PPTG_12086		103.987	6.69589	7.51377	-3.96948	-3.80701	7.9706e-77	3.88204e-75
PPTG_21368		0.936692	0.0573687	0.074075	-4.0756	-3.7334	0.0010105	0.00117732
PPTG_21235		9.97351	143.468	161.356	3.82903	3.9816	1.58735e-125	3.48035e-136
PPTG_18213		0.444806	0.021475	0.0358794	-4.19637	-3.63534	0.00823539	0.0107726
PPTG_12802		0.12054	1.7983	1.92001	3.86622	3.95116	5.46316e-05	3.39582e-05
PPTG_06251		1.08584	0.0286128	0.136197	-4.94249	-3.094	0.00538042	0.0365241
PPTG_24090		10.8485	0.607164	0.842629	-4.16471	-3.67768	4.13947e-13	1.28059e-12
PPTG_10778		1.01757	0.113163	0.0305754	-3.19816	-4.78986	0.0389029	0.0065099
PPTG_21169		1.35119	20.8372	21.3508	3.90677	3.92162	1.97607e-43	6.6454e-44
PPTG_23903		0.329039	5.86867	4.76802	4.08084	3.76564	2.00625e-09	3.81812e-08
PPTG_12935		0.043355	0.604125	0.567486	3.9726	3.87337	0.0171191	0.020043
PPTG_01383		2.05244	28.7049	32.0424	3.86146	4.00127	1.42964e-33	3.6982e-36
PPTG_23367		2.96091	45.3418	46.7026	3.92425	3.94844	2.93311e-85	1.32341e-86
PPTG_24301		2.56581	42.7037	39.8341	3.99686	3.87943	2.09604e-50	1.63557e-47
PPTG_06024		0.401363	5.78958	6.38963	3.89366	4.00981	3.88678e-13	5.86897e-14
PPTG_19209		17.8924	1.53104	0.893182	-3.56807	-4.38017	1.40917e-23	7.4361e-29
PPTG_07718		1497.43	95.3162	99.8573	-3.98052	-3.93191	0	0
PPTG_10508		0.0595994	0.983614	1.02992	3.93683	3.98457	0.00431913	0.00367939
PPTG_16226		0.0777236	1.48124	1.48312	3.97348	3.96456	0.0030995	0.00307926
PPTG_21223		2.66223	44.4814	39.494	4.07216	3.88106	7.00884e-78	1.23462e-70
PPTG_08785		0.304412	0.0154299	0.024913	-4.39984	-3.60889	0.0164886	0.0377005
PPTG_01798		1.3361	20.9474	22.266	3.9496	4.02583	3.74354e-32	1.60827e-33
PPTG_24320		13.6052	0.734963	1.00271	-4.23246	-3.76922	1.49232e-19	2.31223e-18
PPTG_00862		0.0499391	0.781557	0.802476	3.97844	4.01863	0.00453358	0.00395031
PPTG_04927		0.0759303	1.59547	1.11478	4.2806	3.74313	3.47227e-06	6.82034e-05
PPTG_07719		1555.41	95.3538	99.3017	-4.03575	-3.9957	0	0
PPTG_11959		0.152677	2.92749	2.60112	4.1085	3.92909	1.0982e-07	4.21231e-07
PPTG_15544		0.108103	1.59844	1.67945	4.00033	4.05102	0.000132199	0.000101573
PPTG_06148		0.659313	0.0541112	0.0270202	-3.53485	-4.59271	0.00311638	0.00122691
PPTG_17867		2.27066	37.2524	39.3891	4.00183	4.06199	3.53214e-88	3.16721e-91
PPTG_22769		0.105389	1.56715	1.53717	4.06549	4.01597	0.000223254	0.000265887
PPTG_20052		1.51381	23.8175	26.1513	4.0009	4.11425	9.75256e-35	6.96796e-37
PPTG_18458		0.172058	3.9968	2.64294	4.38505	3.78101	9.72898e-08	6.32063e-06
PPTG_23223		0.927986	17.2701	16.8258	4.11208	4.05353	2.15775e-36	1.95223e-35
PPTG_14884		121.57	7.75891	6.74588	-3.9861	-4.19776	7.00363e-117	4.50933e-126
PPTG_03518		0.00426588	0.0991638	0.09722	4.10265	4.07938	0.0168331	0.0170009
PPTG_01330		0.0783717	1.26187	1.17322	4.15516	4.04063	0.00161118	0.00222534
PPTG_22059		0.870789	14.8189	15.3466	4.0842	4.11615	9.03706e-25	3.05117e-25
PPTG_01846		2.91989	0.250373	0.10927	-3.58655	-4.70861	1.51249e-07	6.46548e-09
PPTG_13782		0.523572	0.0242267	0.0391161	-4.52905	-3.73727	0.0103258	0.0244431
PPTG_23265		21.8615	1.19752	1.42466	-4.25506	-3.987	8.72543e-22	1.25825e-21
PPTG_21253		1.41512	25.2655	24.5058	4.15646	4.09781	5.00684e-38	4.87027e-37
PPTG_22629		2.31545	33.2621	50.6403	3.84265	4.43264	8.65139e-53	5.73858e-71
PPTG_09534		0.130815	1.66259	2.70111	3.8105	4.4841	1.83403e-06	9.79519e-09
PPTG_07887		0.0218489	0.552343	0.313143	4.57653	3.73548	0.00343022	0.0219009
PPTG_12788		0.882699	14.4541	14.5288	4.14704	4.13143	6.02883e-24	7.94055e-24
PPTG_09981		0.1015	2.41961	1.60592	4.45321	3.87331	0.000997565	0.0051243
PPTG_21735		0.520487	8.80366	8.32172	4.20496	4.10428	1.17514e-15	5.70951e-15
PPTG_23799		0.792078	13.5705	15.7312	4.0647	4.26125	3.90912e-24	1.32309e-26
PPTG_09781		1.03568	17.2776	19.7008	4.08625	4.25765	6.18792e-29	1.49613e-31
PPTG_07723		12.9295	0.650593	0.81446	-4.31241	-4.04437	2.5624e-26	5.7984e-26
PPTG_22378		0.0370881	0.946614	0.854419	4.27158	4.08866	0.0105779	0.014963
PPTG_21363		0.16961	3.12935	4.07667	4.0088	4.38455	8.34696e-11	7.19868e-13
PPTG_14668		0.192091	0	0.0207831	-5.5099	-3.19642	0.00195564	0.0478071
PPTG_11552		0.0156093	0.347789	0.427598	4.07803	4.32683	0.0134604	0.0075822
PPTG_24059		0.427482	8.0424	7.19587	4.29559	4.11216	2.37778e-11	1.77466e-10
PPTG_16227		0.0669526	0.963646	1.94488	3.74143	4.72439	0.00562133	0.000253129
PPTG_23682		5.75727	105.256	105.863	4.21919	4.20907	4.27151e-141	1.08071e-140
PPTG_03770		2.45101	43.2743	49.1513	4.1319	4.30113	2.96472e-71	1.24665e-77
PPTG_02861		5.6203	0.270092	0.32363	-4.35678	-4.09677	9.36804e-08	1.78898e-07
PPTG_17076		3.58596	64.9826	69.5411	4.18672	4.26823	1.21755e-99	6.69279e-104
PPTG_14951		0.372442	6.70325	6.43327	4.2669	4.19366	9.19896e-10	1.76578e-09
PPTG_02050		0.105218	1.30602	3.24084	3.64598	4.93079	0.00238635	1.55946e-05
PPTG_04814		0.11563	1.99722	2.09499	4.2223	4.25889	6.40898e-08	4.57487e-08
PPTG_15337		148.585	7.68862	8.08775	-4.28393	-4.21199	2.001e-197	1.50525e-201
PPTG_04813		0.0724348	1.25113	1.31238	4.23152	4.26623	7.36436e-05	6.10995e-05
PPTG_19314		2.24616	38.1418	51.1575	4.05406	4.45908	5.66353e-94	8.12357e-115
PPTG_11711		3.98679	0.225326	0.182523	-4.05335	-4.46535	2.01041e-08	5.2168e-09
PPTG_22519		0.163375	3.8852	2.5229	4.60013	3.94664	5.85471e-06	0.000142677
PPTG_13817		0	0.264701	0.201402	4.49587	4.04296	0.0217421	0.0432118
PPTG_18064		3.75435	0.310007	0.116171	-3.63796	-5.01009	4.92603e-08	2.70396e-09
PPTG_10036		1.67327	32.6436	32.022	4.29459	4.2496	8.99182e-58	1.15908e-56
PPTG_04382		0.813133	0.0484202	0.0362871	-3.97892	-4.59146	0.00259627	0.00154423
PPTG_20267		41.4455	2.40427	1.97332	-4.13947	-4.41474	2.82258e-55	1.03925e-58
PPTG_03087		2.08672	0.207744	0.0464091	-3.40218	-5.382	0.000756963	9.27849e-05
PPTG_08975		5.073	95.859	100.316	4.25679	4.30516	3.05395e-105	6.9916e-108
PPTG_02931		2.59825	50.6318	51.8441	4.27165	4.29153	3.27385e-61	6.27564e-62
PPTG_24723		1.06121	21.211	22.0571	4.27055	4.3071	2.83497e-29	7.51316e-30
PPTG_02576		0.0704728	1.38695	1.25151	4.37802	4.21682	1.89438e-06	4.78097e-06
PPTG_24002		5.82188	114.194	113.334	4.31105	4.2841	9.51174e-196	1.36889e-193
PPTG_13638		0.136683	3.57451	3.01951	4.42798	4.17615	3.49371e-05	0.000106538
PPTG_15707		0	0.384718	0.234274	4.70217	3.9677	0.0145383	0.0470556
PPTG_15284		0	0.391808	0.231789	4.7116	3.96794	0.0112429	0.0400683
PPTG_17369		0	0.337938	0.48885	4.08895	4.58746	0.0383963	0.0159641
PPTG_19069		0.268539	4.90761	5.78055	4.22209	4.44599	1.77842e-08	2.29602e-09
PPTG_01110		0.190535	3.47305	4.53468	4.15346	4.52745	2.51714e-05	3.25503e-06
PPTG_24378		38.5088	795.742	798.586	4.36184	4.35073	0	0
PPTG_05205		6.37696	0.194709	0.465673	-5.02448	-3.78904	6.56412e-08	1.41678e-07
PPTG_12206		2.62505	52.8988	54.4708	4.35272	4.37765	2.01611e-77	1.69528e-78
PPTG_11167		3.35494	69.6286	67.8342	4.3987	4.34544	1.11854e-87	1.19415e-85
PPTG_17392		0.0210076	0.463289	0.462975	4.37394	4.37466	0.00717411	0.0069453
PPTG_03431		0	0.423422	0.446531	4.34813	4.40106	0.0152641	0.0131949
PPTG_24749		0	0.555377	0.406384	4.61769	4.1468	0.0139075	0.0304971
PPTG_21939		0.544035	11.3524	10.7543	4.422	4.33367	1.29094e-18	6.34789e-18
PPTG_03286		1.32814	27.1939	28.695	4.353	4.40775	3.00851e-41	2.07133e-42
PPTG_06403		0.355654	7.3849	6.43329	4.48844	4.27564	1.86705e-14	3.4171e-13
PPTG_09802		0	0.406281	0.399312	4.39443	4.37265	0.0194784	0.0194252
PPTG_11119		5.75529	0.285877	0.264441	-4.25874	-4.52284	8.85189e-08	3.69176e-08
PPTG_03261		1.19156	0.0349316	0.0923904	-5.16354	-3.73914	0.00239265	0.0096977
PPTG_11654		0	0.620811	0.365674	4.79582	4.02641	0.0103717	0.038475
PPTG_14954		0.676758	13.6263	15.9585	4.29619	4.50138	5.56591e-28	7.95172e-31
PPTG_21695		0.0609088	1.18952	1.11867	4.44081	4.35804	0.0047411	0.005596
PPTG_17391		0.0280725	0.619096	0.64079	4.37383	4.42634	0.0070524	0.00606887
PPTG_03754		1.86897	39.3628	40.8955	4.39219	4.43064	2.07203e-137	4.41156e-140
PPTG_07892		0.0341137	1.31621	0.757763	4.8355	4.03498	0.0013965	0.0100102
PPTG_15311		18.7337	0.78622	0.955093	-4.53215	-4.30582	1.25198e-18	1.52314e-18
PPTG_18244		0.680041	0.0384929	0.0229364	-4.09039	-4.77889	0.0017638	0.00106068
PPTG_05771		0	0.293218	0.559315	3.98251	4.91517	0.0369252	0.00617744
PPTG_15381		1.70644	36.3913	37.3197	4.42104	4.44026	4.95143e-84	5.90974e-85
PPTG_24312		0.614236	14.1305	14.4646	4.42459	4.44168	2.25456e-17	1.50588e-17
PPTG_24034		0.161212	3.48649	3.98009	4.35671	4.53215	1.87074e-19	4.12285e-21
PPTG_02040		2.92676	67.9246	61.6965	4.52194	4.3688	4.52452e-63	6.35358e-59
PPTG_15336		151.017	6.70442	7.22495	-4.5031	-4.39646	2.17345e-159	4.63766e-162
PPTG_14879		30.8307	1.778	1.07868	-4.09229	-4.84294	7.8702e-41	1.97542e-43
PPTG_10683		0	0.614401	0.703297	4.35825	4.55066	0.0184577	0.0123169
PPTG_06488		0	0.375051	0.869673	3.90958	5.07799	0.0330957	0.00285701
PPTG_07919		0.0679927	1.87458	1.19395	4.81423	4.13715	0.000102223	0.00111978
PPTG_09134		0.803346	0.0296341	0.0295171	-4.42114	-4.51119	0.0199468	0.0167844
PPTG_08863		3.09881	0.148301	0.140919	-4.42877	-4.52094	1.52601e-06	8.86777e-07
PPTG_22798		1.09715	27.6205	19.2888	4.76891	4.23065	2.67397e-23	2.04177e-18
PPTG_07848		0	0.289899	0.381671	4.33597	4.67363	0.045474	0.0269757
PPTG_13069		4.56358	0.287038	0.140274	-4.05259	-5.04874	1.19765e-08	8.5924e-10
PPTG_09390		0.779989	17.8425	15.9013	4.63108	4.44438	1.37469e-32	4.90132e-30
PPTG_00148		1.56714	0.0559209	0.0864346	-4.8103	-4.28486	0.000717414	0.000661471
PPTG_17869		0.0271296	0.5692	0.694696	4.4034	4.68187	0.000407758	0.000141906
PPTG_13068		0.929289	0.0926962	0	-3.41435	-6.0429	0.0473327	0.00123779
PPTG_12653		3.95884	85.6699	95.823	4.47249	4.61708	2.73571e-115	2.4209e-123
PPTG_14742		0.691135	0.0244069	0.0243105	-4.49974	-4.58979	0.0166118	0.0139286
PPTG_23633		38.8888	1.62405	1.69471	-4.57505	-4.53568	7.54696e-45	2.06608e-46
PPTG_09462		2.30908	55.0302	56.8474	4.54267	4.57644	2.98202e-121	2.77408e-123
PPTG_20962		0.0483762	0.885571	1.18348	4.37407	4.75604	0.00496797	0.00184634
PPTG_11091		0	0.441492	0.553097	4.3983	4.7305	0.0426116	0.0253965
PPTG_21881		0.0357019	1.01105	1.26786	4.42954	4.70476	0.00681191	0.00352714
PPTG_21869		8.00872	0.291041	0.396092	-4.81416	-4.33411	2.95558e-21	7.5995e-21
PPTG_06183		1.21686	27.8571	27.7744	4.59837	4.57795	1.06203e-36	1.87162e-36
PPTG_11951		3.56489	80.5679	88.296	4.53932	4.65088	2.8438e-77	2.60085e-81
PPTG_24985		475.675	18.4936	21.2778	-4.68564	-4.50628	1.35446e-301	1.32502e-298
PPTG_24990		475.675	18.4936	21.2778	-4.68564	-4.50628	1.35446e-301	1.32502e-298
PPTG_14880		174.242	7.22157	7.36386	-4.60146	-4.59472	3.69369e-175	1.58399e-180
PPTG_03829		0.0795899	1.68566	2.11394	4.45387	4.74813	0.000407013	0.000135721
PPTG_06232		16.8235	0.765852	0.622375	-4.46764	-4.76366	3.68687e-20	7.18756e-21
PPTG_04277		0.0459196	0.860324	1.19866	4.39198	4.8631	0.00621173	0.00194425
PPTG_13372		2.33881	55.9304	60.059	4.58349	4.66781	2.13453e-61	8.04572e-64
PPTG_22168		0.190453	3.20717	6.40649	4.16041	5.15878	0.00025717	2.91088e-06
PPTG_10507		0	0.385296	0.545791	4.41562	4.86454	0.0351356	0.0168773
PPTG_17138		1.63494	0.149341	0.0205184	-3.39585	-6.33991	5.84045e-05	6.36752e-06
PPTG_06996		15.2927	0.967811	0.362011	-3.95926	-5.4547	9.07366e-22	6.10719e-23
PPTG_18167		0.0335255	0.921075	1.42132	4.34824	4.97313	0.00512383	0.00098705
PPTG_03594		1.60705	37.1594	44.0596	4.53734	4.76639	8.39797e-72	1.18491e-79
PPTG_14893		48.7131	1.81749	2.06384	-4.7664	-4.56316	1.16357e-78	1.53686e-81
PPTG_05354		0	0.309145	0.649527	4.17609	5.21008	0.0248878	0.00297134
PPTG_20092		731.251	29.3295	28.747	-4.64952	-4.69759	0	0
PPTG_24819		0.334105	8.35593	9.72631	4.58791	4.78406	3.59248e-18	8.4565e-20
PPTG_14471		2.52912	0.153915	0.0576733	-3.95211	-5.56515	3.73801e-05	1.77459e-05
PPTG_01119		0	0.538215	0.739775	4.46031	4.9384	0.0190465	0.00748505
PPTG_23668		0	0.377725	0.665212	4.29648	5.13179	0.0175208	0.00290716
PPTG_22931		1.00064	27.4132	27.0915	4.71922	4.68192	2.07097e-45	9.24741e-45
PPTG_22792		0.181026	0	0.0112345	-5.62722	-3.92692	0.00249483	0.0320115
PPTG_17868		0.747865	19.3627	19.6876	4.70108	4.707	1.83754e-43	1.15134e-43
PPTG_18917		32.0242	1.3468	1.1729	-4.61033	-4.80044	5.88809e-43	1.55176e-44
PPTG_14469		1.21054	0.0455975	0.0465164	-4.67249	-4.73846	3.11671e-08	1.64248e-08
PPTG_21092		1.53082	40.8257	39.1899	4.75094	4.66849	2.88397e-52	1.66498e-50
PPTG_09371		0.432988	10.3912	10.3903	4.72586	4.71441	1.01178e-14	1.08211e-14
PPTG_05218		0.602059	15.9355	17.5926	4.66466	4.7929	1.95904e-37	1.20156e-39
PPTG_23583		0.456416	11.9778	13.35	4.66375	4.8077	3.20595e-22	1.13154e-23
PPTG_14892		35.9029	1.2358	1.49794	-4.89855	-4.58125	3.22834e-37	9.77001e-38
PPTG_13878		1.12686	30.6541	31.4271	4.73682	4.75772	4.16471e-64	8.55669e-65
PPTG_17120		0.023907	0.53989	0.603819	4.67714	4.82084	0.00307831	0.00209671
PPTG_17368		0	0.572267	0.531798	4.81278	4.68622	0.00928474	0.0114739
PPTG_18241		0	0.231617	0.340926	4.47985	5.04062	0.0112273	0.00320526
PPTG_11656		3.89318	111.885	108.452	4.79277	4.73012	1.5313e-118	1.54459e-115
PPTG_02252		0.0221493	0.640267	0.645616	4.77335	4.77333	0.00131969	0.0012825
PPTG_12824		0	0.682823	0.342772	5.33094	4.29289	0.0011716	0.012676
PPTG_22019		2.3095	64.1849	66.3089	4.77236	4.80161	1.39859e-65	1.62689e-66
PPTG_22932		0.979591	28.144	29.8703	4.75943	4.82238	2.82872e-35	2.60284e-36
PPTG_24875		7.44141	197.224	217.046	4.73121	4.8531	1.41045e-208	3.44305e-220
PPTG_07942		0.197323	5.62256	5.25703	4.85684	4.74486	5.87858e-11	1.63137e-10
PPTG_15562		0.029739	0.835586	0.658125	4.9806	4.6297	0.00085227	0.00217171
PPTG_16796		0.825066	0.0291227	0.0279503	-4.76216	-4.85221	0.00751215	0.00618726
PPTG_00628		0.989582	0	0.0573591	-5.73683	-4.03875	0.00233025	0.0294689
PPTG_24462		1.13997	32.3247	30.6239	4.86059	4.76718	2.38148e-44	1.05011e-42
PPTG_17561		0.0568324	1.84214	2.10802	4.72842	4.91648	0.000143981	6.83447e-05
PPTG_21335		1.05304	28.6016	32.105	4.75359	4.90262	3.64663e-40	7.36096e-43
PPTG_04120		0.0659357	1.56247	2.65502	4.47682	5.21289	1.2778e-06	9.28681e-09
PPTG_22048		7.03435	0.542061	0.0828181	-3.71734	-6.28029	1.01913e-08	9.02047e-08
PPTG_20076		0	0.675396	0.575476	4.99604	4.72184	0.00440578	0.00764834
PPTG_07881		0.202426	5.45668	6.1301	4.78356	4.93475	8.46714e-09	2.35977e-09
PPTG_07541		0	0.977474	0.393156	5.55734	4.25056	0.000833014	0.0159195
PPTG_14195		0.314209	9.20861	8.98931	4.89467	4.85033	6.01411e-14	9.81289e-14
PPTG_24206		0.0438401	1.105	1.20444	4.81927	4.92829	0.00125998	0.000903281
PPTG_10704		0	0.561927	0.431237	5.08313	4.68848	0.002243	0.00547241
PPTG_04934		0.0504923	1.45483	1.48295	4.87939	4.88582	7.38946e-05	7.05267e-05
PPTG_22277		0	0.354776	0.375837	4.85638	4.91275	0.00645699	0.00553862
PPTG_22343		0.0267864	0.860704	0.594633	5.16389	4.62881	0.000376775	0.00174094
PPTG_17870		0.0543023	1.49489	1.7323	4.79687	4.99866	7.76265e-05	3.35679e-05
PPTG_14194		3.17407	99.5909	100.06	4.91085	4.9023	1.19587e-128	2.13476e-128
PPTG_21255		10.4532	261.749	388.913	4.63912	5.19823	8.49814e-137	3.22064e-172
PPTG_24166		0	0.431659	0.903118	4.43311	5.45984	0.00908166	0.000718008
PPTG_15838		0	0.500845	0.663781	4.7211	5.13151	0.00462052	0.00164851
PPTG_21263		0.984742	30.5575	31.7576	4.90747	4.94171	1.62914e-34	4.50774e-35
PPTG_24516		0.631343	18.5528	18.4115	4.94443	4.91461	3.33322e-24	5.87826e-24
PPTG_03042		0	0.844823	0.379793	5.56043	4.38742	0.000381604	0.00771148
PPTG_01417		1.16699	0.0226464	0.065024	-5.86178	-4.16601	1.26995e-06	1.77825e-07
PPTG_11209		11.772	0.295801	0.483722	-5.32059	-4.5932	2.97646e-26	1.90932e-27
PPTG_10051		1.72077	0.0844167	0.0397305	-4.46755	-5.474	0.00199913	0.000496072
PPTG_24205		0.0278917	0.737212	1.15872	4.65578	5.28395	0.0016776	0.000256249
PPTG_03237		0.0354232	2.06055	1.12624	5.42456	4.54311	0.00025784	0.00296198
PPTG_15179		0	0.52687	0.513617	5.02085	4.95544	0.00199425	0.00228073
PPTG_17878		0.414789	0	0	-4.94542	-5.03548	0.0447321	0.039365
PPTG_13604		0.219844	0	0	-4.94551	-5.03556	0.0479479	0.0423249
PPTG_16204		0.445344	0.0208088	0	-4.50665	-5.55849	0.0292497	0.00533475
PPTG_10882		1.42904	0	0.0798232	-5.99715	-4.19099	0.00169889	0.0239474
PPTG_20653		0	0.957988	0.904322	5.08097	4.96638	0.00184112	0.00238084
PPTG_07614		0.162904	5.01187	5.46269	4.96886	5.07955	1.84222e-09	7.03031e-10
PPTG_04278		2.52915	84.2641	82.5506	5.05104	5.00207	4.83479e-185	1.33784e-181
PPTG_25033		0	1.00697	1.08452	4.97477	5.09103	0.00457768	0.00344619
PPTG_11954		0	0.898444	0.749899	5.18026	4.9181	0.0011379	0.00218603
PPTG_23263		73.631	2.13086	2.25811	-5.05241	-5.06621	3.94963e-52	9.08545e-54
PPTG_01198		0	0.625282	1.40911	4.50503	5.68263	0.00683889	0.000315268
PPTG_03218		1.18299	41.1157	38.9678	5.11025	5.01293	1.47627e-50	1.12056e-48
PPTG_11120		2.97101	0.0472406	0.16619	-6.06431	-4.23353	3.63723e-05	7.96747e-05
PPTG_22552		2.73424	92.6205	95.5722	5.05875	5.08717	1.41855e-116	4.05592e-118
PPTG_22328		0.828636	28.2588	24.961	5.17384	4.97726	6.7834e-32	1.52051e-29
PPTG_15057		0.453911	0	0	-5.03349	-5.12354	0.0492575	0.043538
PPTG_02062		0.106407	3.61962	3.53426	5.09966	5.06086	1.97261e-05	2.26674e-05
PPTG_13361		0.0866275	3.53788	3.59323	5.08289	5.08108	2.81605e-08	2.73716e-08
PPTG_23534		56.3696	1.26619	2.07448	-5.4426	-4.76681	3.74296e-78	1.10424e-77
PPTG_19842		0	0.696012	0.864629	4.95821	5.2404	0.00319469	0.00156065
PPTG_16401		0.218259	6.90165	8.22513	4.98238	5.2184	1.24407e-09	1.70843e-10
PPTG_06734		0	0.511158	0.626855	4.9572	5.24851	0.0019414	0.000863428
PPTG_22255		0.129581	4.82203	5.26754	5.05308	5.15395	4.50527e-07	2.3894e-07
PPTG_02049		0.7385	24.5013	26.3036	5.0636	5.14642	1.31341e-37	6.28979e-39
PPTG_21241		0.627507	19.3746	24.176	4.95801	5.25885	8.25627e-24	8.0451e-27
PPTG_12725		0.0214944	1.14171	0.898659	5.29312	4.93955	0.000244399	0.000702425
PPTG_09755		38.6997	0.884569	1.39546	-5.41836	-4.82837	2.94012e-51	1.08512e-50
PPTG_04882		1.94997	0	0.134642	-6.71391	-3.90249	5.31362e-05	0.00422828
PPTG_01486		0.245031	0	0	-5.07508	-5.16513	0.0353762	0.0307335
PPTG_22740		0.885472	29.9867	30.596	5.12134	5.1378	3.22399e-64	9.60928e-65
PPTG_19934		0.928404	33.7348	34.6897	5.12213	5.14422	1.08354e-45	3.67054e-46
PPTG_22738		1.78369	59.2804	65.2256	5.07387	5.19319	1.58531e-70	4.20805e-74
PPTG_22783		0.0942019	3.02486	2.98529	5.14371	5.12797	3.28989e-05	3.42968e-05
PPTG_23455		0	0.984006	0.583163	5.53181	4.76929	0.00442305	0.0169797
PPTG_16182		0.134878	4.8666	5.93011	5.00737	5.2712	1.7189e-13	6.16041e-15
PPTG_19099		1.11424	0	0.0413765	-5.59757	-4.72582	0.00253485	0.0125815
PPTG_16797		1.05689	0	0.0392054	-5.59773	-4.72599	0.00265087	0.0129768
PPTG_05110		1.24808	0.0395907	0	-4.6471	-5.69895	0.0149768	0.00209865
PPTG_11367		0.855908	0	0	-5.10204	-5.19209	0.0284545	0.0245335
PPTG_15830		0.220417	0	0	-5.10204	-5.19209	0.0284545	0.0245335
PPTG_16219		0	0.311657	0.461172	4.88262	5.44377	0.00200049	0.000405113
PPTG_12492		0.197206	7.24774	6.69432	5.22881	5.09657	2.59671e-10	7.51284e-10
PPTG_20754		0.157746	5.98058	5.21733	5.27219	5.05734	2.81916e-08	1.0948e-07
PPTG_13751		6.67651	0.1578	0.232483	-5.5016	-4.86582	5.12314e-08	8.59053e-09
PPTG_00627		0.741634	0	0	-5.14195	-5.232	0.0367417	0.0320115
PPTG_10647		0.850798	29.8641	31.6583	5.16666	5.23357	2.28488e-60	4.53647e-62
PPTG_20857		1.11967	0	0	-5.16807	-5.25812	0.0231418	0.0198629
PPTG_24974		0.838256	26.6639	36.6429	5.01008	5.45281	3.84903e-21	5.19282e-25
PPTG_18733		0.190106	6.10661	6.28467	5.21857	5.24693	1.15624e-10	8.52654e-11
PPTG_24350		4.65448	0.133643	0.104484	-4.9463	-5.5389	5.85319e-05	4.93004e-05
PPTG_24794		0	1.41492	1.0233	5.48504	4.99568	0.000593544	0.00210196
PPTG_12830		2.20096	74.0507	98.893	5.04729	5.4504	1.85573e-90	7.7511e-106
PPTG_12117		0	0.529772	0.55607	5.2137	5.27731	0.00152066	0.00125691
PPTG_08394		1.65922	65.6734	59.6509	5.31918	5.17337	3.29099e-20	3.60808e-19
PPTG_00458		0	0.798607	0.475825	5.6506	4.87667	0.000288469	0.00235026
PPTG_16197		25.3365	0.736582	0.60967	-5.10285	-5.4181	3.56308e-38	1.78608e-38
PPTG_06434		0	0.447069	0.508301	5.17879	5.36533	0.0404866	0.0313642
PPTG_02510		0	0.284644	0.377609	5.08126	5.46841	0.00160009	0.000547366
PPTG_09972		0.351746	13.1454	12.7933	5.297	5.24616	7.35148e-24	1.88067e-23
PPTG_11857		0.0161992	0.742267	0.963153	5.10471	5.46019	0.000432921	0.000137256
PPTG_20920		0.10125	4.0013	3.20826	5.45549	5.11221	6.00157e-06	2.54045e-05
PPTG_10703		0	1.37853	0.966801	5.56092	5.02426	0.00029778	0.00133409
PPTG_09115		0.355751	0	0	-5.24335	-5.3334	0.0213626	0.0183809
PPTG_00123		0.670919	0	0	-5.24356	-5.33361	0.0252409	0.021768
PPTG_12724		0.0260546	1.44219	1.08931	5.50011	5.0849	2.66794e-08	3.25942e-07
PPTG_24468		1.41136	0	0.0399833	-5.74271	-4.87096	0.00217188	0.010857
PPTG_10270		1.52212	61.4066	64.2102	5.28052	5.32472	6.95246e-85	1.81079e-86
PPTG_13712		1.1594	43.1718	48.507	5.22856	5.38287	6.91755e-62	9.76474e-66
PPTG_10625		0.11654	5.53682	3.84404	5.60771	5.06587	1.85112e-06	2.04309e-05
PPTG_06257		0	0.332787	0.777605	4.75047	5.99041	0.00548102	0.000234153
PPTG_06382		0.829064	0.0246818	0.0148989	-4.88901	-5.82457	0.000515016	0.000126031
PPTG_21868		2.84419	123.682	121.367	5.37477	5.32972	4.49318e-139	6.83536e-137
PPTG_22379		0	0.699291	0.284558	6.04078	4.74684	0.000203847	0.00526945
PPTG_22151		0.841518	36.3778	37.0972	5.34897	5.36098	5.1322e-44	2.75405e-44
PPTG_07380		0.0791906	2.69443	3.17373	5.25133	5.46834	1.65671e-05	6.3701e-06
PPTG_24334		1.56551	66.8699	66.2734	5.37779	5.34638	7.93724e-57	3.15741e-56
PPTG_05288		0.34561	0	0	-5.32604	-5.4161	0.0239372	0.0206712
PPTG_23403		0.173728	6.93616	8.25064	5.26013	5.49083	2.83571e-08	5.63104e-09
PPTG_23578		0.100465	3.50706	4.99519	5.1505	5.62756	2.4286e-05	3.02352e-06
PPTG_18907		0.214605	8.30723	8.59937	5.37511	5.40911	7.47574e-19	4.06359e-19
PPTG_24724		0.659808	30.2625	28.5358	5.45649	5.35322	5.22194e-33	8.18526e-32
PPTG_07971		0.630865	0	0	-5.36109	-5.45114	0.0165243	0.0142055
PPTG_22351		0	0.210797	0.155823	5.65758	5.18537	0.00040998	0.00141731
PPTG_18065		0.456769	0	0.0172904	-6.35041	-4.63354	9.73014e-05	0.00289804
PPTG_06458		0.0508677	2.33281	3.14274	5.23491	5.6644	2.48072e-07	1.77998e-08
PPTG_02819		0.256249	0	0	-5.40476	-5.49481	0.0110049	0.00939718
PPTG_22360		0.78058	0	0	-5.40552	-5.49557	0.0118892	0.010162
PPTG_13327		0.0992612	4.79251	5.04374	5.42415	5.47921	8.0229e-09	5.19465e-09
PPTG_23706		0.431943	19.5849	19.8405	5.45237	5.45987	9.08819e-22	7.3065e-22
PPTG_00851		0.473552	0	0	-5.41637	-5.50642	0.010415	0.00886674
PPTG_17887		0.750047	32.1934	36.781	5.37297	5.55091	2.23158e-54	3.86388e-58
[truncated: 582 more rows]
