# Supplementary material for: Mutations in PpAGO3 Lead to Enhanced Virulence of Phytophthora parasitica by Activation of 25–26 nt sRNA-Associated Effector Genes
Source: Frontiers journal article supplement (doi:10.3389/fmicb.2022.856106), 2022-03-24
Supplement: Data_Sheet_1.ZIP [file Table S3.xlsx]

## Sheet: Sheet1
Supplementary Table S3. Differential expression genes in PpAGO3ΔRGG1/3 mutants (3047 genes)
		Gene expression level (FPKM)			log2Foldchange		padj
Geneid	Gene type	WT	PpAGO3ΔRGG1	PpAGO3ΔRGG3	PpAGO3ΔRGG1	PpAGO3ΔRGG3	PpAGO3ΔRGG1	PpAGO3ΔRGG3
PPTG_07435	RxLR	1.24919	0	0	-7.54999	-7.4941	8.4015e-06	1.02093e-05
PPTG_15425	RxLR	0.0835978	9.45781	7.92236	6.66607	6.48607	2.15634e-42	5.12705e-40
PPTG_01869	RxLR	0	0.265176	0.265985	4.45282	4.53052	0.0166097	0.0151352
PPTG_16456	RxLR	12.3163	5.39656	4.68107	-1.25767	-1.36219	0.000686802	0.000225147
PPTG_07218	RxLR	14.0809	0.0912765	0.160788	-7.30053	-6.40185	2.0447e-23	1.57969e-28
PPTG_15189	RxLR	11.0885	0.85082	1.53941	-3.73694	-2.81156	2.48261e-35	6.7375e-24
PPTG_00450	RxLR	9.25128	2.7341	2.78522	-1.80692	-1.69463	5.29432e-10	5.95299e-09
PPTG_13722	RxLR	3.0213	0.0936581	0.0506543	-5.05106	-5.88504	1.33552e-20	1.1351e-18
PPTG_07728	RxLR	2.91761	0.00696026	0	-8.52949	-9.43539	8.81413e-11	5.27966e-13
PPTG_03190	RxLR	1.54764	0.159032	0.202142	-3.32706	-2.88599	0.00127927	0.00557714
PPTG_07607	RxLR	2.75787	0.0455856	0	-5.94091	-8.33126	6.13594e-08	3.28009e-09
PPTG_16462	RxLR	4.00581	8.92248	8.49379	1.09662	1.12519	0.00697803	0.00568925
PPTG_03385	RxLR	1.00063	0.203518	0.183771	-2.35143	-2.41633	8.83406e-06	6.90507e-06
PPTG_18819	RxLR	1.50509	7.08396	5.72078	2.18605	1.96413	2.31584e-06	2.81303e-05
PPTG_08852	RxLR	0.781089	2.60052	1.82499	1.69383	1.25907	3.19145e-06	0.000913255
PPTG_06988	RxLR	2.14687	0.0893015	0.153572	-4.60241	-3.75906	0.00328305	0.0124971
PPTG_05602	RxLR	1.96625	9.82999	11.3758	2.26206	2.57126	0.000351301	3.89286e-05
PPTG_15280	RxLR	1.57695	0.131576	0.0748479	-3.60552	-4.36617	4.76376e-05	2.03241e-05
PPTG_20708	RxLR	0.244119	1.75512	1.20098	2.83192	2.36125	5.51016e-07	5.22399e-05
PPTG_23693	RxLR	0.106434	1.73508	1.59065	4.01687	3.9801	4.29629e-19	1.02379e-18
PPTG_22520	RxLR	0.0851586	3.12633	2.96966	5.04202	5.05469	1.23308e-09	1.12885e-09
PPTG_14310	RxLR	0.0577736	1.34994	0.983068	4.38132	4.02935	9.65673e-05	0.00041297
PPTG_02008	RxLR	0	0.270455	0.130001	4.68058	3.6639	0.00543563	0.0431085
PPTG_05680	RxLR	0	0.113094	0.0634581	4.64532	3.85056	0.00850212	0.0389639
PPTG_11304	CRN	15.0577	0.0213033	0	-9.47861	-12.8631	2.24465e-50	3.07378e-25
PPTG_01717	CRN	36.9509	16.011	17.018	-1.24781	-1.08773	1.40832e-15	4.01204e-12
PPTG_11600	CRN	16.3781	0.00930759	0	-10.8126	-11.7185	5.32406e-18	5.47826e-21
PPTG_12078	CRN	7.92302	0.0103774	0.0199018	-9.6072	-8.6543	7.43628e-14	1.25305e-14
PPTG_22243	CRN	0.00486437	28.8749	29.3227	12.2741	12.3747	2.34109e-23	9.11679e-24
PPTG_15032	CRN	0.0879149	1.85516	0.937408	4.54383	3.66718	0.000671382	0.00844155
PPTG_18147	CRN	0	6.24526	7.32817	9.55296	9.87357	4.25158e-14	5.20294e-15
PPTG_18920	CRN	0	35.5207	32.17	10.9482	10.9005	4.44519e-18	6.32605e-18
PPTG_09076	CRN	0	30.4258	29.5908	11.8409	11.8849	9.65217e-22	6.70164e-22
PPTG_11786	CRN	129.465	40.6641	44.0676	-1.71195	-1.52385	3.93964e-46	1.12991e-36
PPTG_10698	CRN	18.0413	7.8869	7.75428	-1.23505	-1.18834	1.72795e-13	1.52491e-12
PPTG_02860	CRN	9.85023	25.203	23.8964	1.30604	1.30973	5.9573e-36	4.62163e-36
PPTG_07168	CRN	8.93199	4.3874	3.84563	-1.08469	-1.18143	0.0121633	0.0061314
PPTG_10416	CRN	7.94191	4.07904	3.59979	-1.00784	-1.11022	1.64641e-10	2.47553e-12
PPTG_01111	CRN	7.41873	3.13506	2.55195	-1.28458	-1.50925	1.93391e-09	2.81531e-12
PPTG_06852	CRN	5.02053	14.0839	16.6234	1.44486	1.76502	0.000827227	3.13504e-05
PPTG_06853	CRN	10.1289	27.6527	25.0265	1.38643	1.33996	0.00209364	0.00318116
PPTG_17003	CRN	2.0856	7.49461	7.81733	1.79554	1.9343	8.62342e-13	9.38064e-15
PPTG_22281	CRN	0.520889	3.41673	2.03982	2.658	2.00075	7.70363e-06	0.00117369
PPTG_01844	CRN	1.14138	0.248914	0.123835	-2.24839	-3.18169	0.00960728	0.00133705
PPTG_04636	CRN	0.242572	0.996094	0.964361	1.97674	1.99676	0.000730608	0.000669564
PPTG_03772	CRN	0.0279368	29.7897	30.867	10.0508	10.1705	3.11659e-30	6.40961e-31
PPTG_14804	CRN	0	0.0622422	0.0816065	3.95212	4.43565	0.0344757	0.0153258
PPTG_19313	CRN	0	0.848594	1.38166	4.24182	5.00474	0.00627474	0.000808499
PPTG_15504	CRN	0.013124	0.306352	0.156821	4.22335	3.35864	0.00864196	0.0489076
PPTG_07603	CRN	0	1.40562	1.12418	6.48876	6.2373	5.67192e-06	1.49593e-05
PPTG_03580	CRN	0	1.2084	1.46464	8.18491	8.52865	1.61242e-10	2.25831e-11
PPTG_09074	INF-like	0	0.556498	0.288747	5.55684	4.72414	0.000285812	0.00298473
PPTG_09075	INF-like	0	8.11552	6.55711	10.3213	10.1039	9.1862e-16	3.78018e-15
PPTG_19861	INF-like	0.113741	35.8981	26.2576	8.19384	7.83141	1.4334e-30	6.00035e-28
PPTG_09080	INF-like	1678.88	202.022	163.871	-3.11194	-3.32575	1.49231e-45	7.6201e-52
PPTG_19868	INF-like	762.722	121.248	104.179	-2.70221	-2.84018	2.71806e-17	5.27557e-19
PPTG_07733	INF-like	170.424	51.9807	59.6265	-1.75743	-1.47847	4.54145e-16	1.14833e-11
PPTG_15237	INF-like	82.1785	7.61227	4.12668	-3.50152	-4.28577	1.80538e-10	4.38885e-15
PPTG_09077	INF-like	24.3836	7.43512	5.24154	-1.77529	-2.18465	9.36633e-07	1.14905e-09
PPTG_05250	INF-like	6.03712	29.1035	20.822	2.2247	1.81808	1.76209e-09	1.30349e-06
PPTG_14235	INF-like	11.9851	4.26794	2.70949	-1.5358	-2.10776	0.00173125	1.51089e-05
PPTG_09079	INF-like	1.8085	0.329776	0.0530192	-2.51472	-5.04683	0.00289369	3.03697e-06
PPTG_05402	INF-like	12.6635	0.471609	0.425484	-4.78572	-4.85293	3.07571e-08	2.54143e-08
PPTG_23722	INF-like	4.27692	0.0569014	0.243457	-6.17524	-4.09261	1.58683e-05	0.000116426
PPTG_14236	INF-like	0.591351	1.8534	2.10611	1.59409	1.84653	0.0249065	0.00802417
PPTG_19863	INF-like	0.322505	1.17253	1.16871	1.82128	1.88965	0.00180511	0.00117456
PPTG_23721	NPP-like	162.927	18.2619	14.5013	-3.20545	-3.45675	4.01403e-79	4.45846e-91
PPTG_15231	NPP-like	18.3157	0.350389	0.386995	-5.75379	-5.52702	9.6498e-23	1.13613e-21
PPTG_17049	NPP-like	10.069	0.673851	0.571115	-3.95266	-4.11208	6.61325e-30	1.49296e-30
PPTG_07690	NPP-like	1.96869	12.9387	15.286	2.66536	3.00366	0.0130721	0.004784
PPTG_04504	NPP-like	2.56484	0.11565	0.0826839	-4.50752	-4.91923	1.31428e-06	8.83333e-07
PPTG_08005	NPP-like	0.523447	0.0687398	0.0408028	-2.99224	-3.63777	1.93466e-05	2.79778e-06
PPTG_07089	NPP-like	1.60515	0.363549	0.454784	-2.19325	-1.78784	7.64377e-05	0.000969432
PPTG_17295	NPP-like	1.66791	0.141238	0.313754	-3.58878	-2.3745	3.83339e-06	0.000456318
PPTG_07991	NPP-like	1.50438	0.425776	0.439685	-1.8542	-1.73569	0.00542352	0.00978251
PPTG_08017	NPP-like	0.742964	0.109778	0.101426	-2.79791	-2.83153	1.27976e-05	1.2766e-05
PPTG_07664	NPP-like	0.963993	0.302839	0.203227	-1.69896	-2.21792	0.00964604	0.00101696
PPTG_11479	NPP-like	0.174062	0.642177	0.636289	1.85608	1.91035	0.0377593	0.0332232
PPTG_06840		1328.44	0.391261	0.062315	-11.8363	-14.3389	1.50703e-46	2.39057e-44
PPTG_02512		968.087	0.430529	0.0925109	-11.2559	-13.3248	1.12003e-16	4.61269e-21
PPTG_19835		404	0.161427	0.667543	-11.4155	-9.21334	3.69637e-08	1.06806e-05
PPTG_11239		530.583	0.176291	0.0769219	-11.5902	-12.723	4.21669e-182	8.52555e-107
PPTG_06814		848.846	0.110881	0.106107	-12.9996	-12.9432	8.63702e-81	5.53947e-80
PPTG_19834		481.342	0.116046	0.666997	-12.1448	-9.46623	5.17985e-08	2.14302e-05
PPTG_14885		233.767	0.0996151	0.0162955	-11.31	-13.7593	4.28839e-123	4.45827e-51
PPTG_25035		1585.49	0.331585	0.139238	-12.3368	-13.4254	3.13282e-14	4.92103e-15
PPTG_14888		1727.32	0.517192	0.208398	-11.8086	-12.9729	3.61345e-21	4.55134e-21
PPTG_07853		710.724	0.258242	0.0508703	-11.5458	-13.7257	9.06806e-25	6.81752e-24
PPTG_08559		546.444	0.181685	0.0258214	-11.6806	-14.3415	5.78072e-17	4.65286e-17
PPTG_14886		683.964	0.300446	0.0489112	-11.262	-13.7912	3.89846e-134	3.06773e-38
PPTG_04491		818.902	0.393679	0.0495871	-11.1486	-13.9869	3.25577e-12	9.48694e-14
PPTG_19128		267.355	57.8007	58.0542	-2.25739	-2.17122	5.59632e-41	7.28831e-38
PPTG_17688		143.554	36.4999	44.7983	-1.9975	-1.65387	8.45519e-08	1.25529e-05
PPTG_06968		337.15	0.0284187	0.042367	-13.5697	-12.928	3.2221e-37	6.85327e-50
PPTG_14887		298.724	0.118405	0.0279639	-11.4279	-13.3549	7.97703e-09	9.37546e-10
PPTG_24743		723.714	0.543047	1.01234	-10.4893	-9.45402	0.000247928	0.00103658
PPTG_21254		119.497	0.0358169	0.00568382	-11.8081	-14.2313	1.68622e-81	4.51114e-31
PPTG_20636		1194.57	0.677896	0.106338	-10.8997	-13.4069	2.39218e-07	6.98019e-09
PPTG_19028		89.7166	0.0372688	0	-11.3585	-15.1695	0.0007158	1.35218e-05
PPTG_20091		521.783	0.192679	0.0978454	-11.5289	-12.3604	2.15072e-05	7.54242e-06
PPTG_07518		377.183	0.0950638	0	-12.0598	-14.861	1.20214e-57	8.84398e-34
PPTG_07519		400.598	0.207665	0.0493005	-11.0422	-12.9864	1.72925e-92	3.41731e-34
PPTG_24742		864.204	0.752364	2.21208	-10.2917	-8.58212	0.000102099	0.00134924
PPTG_12578		139.726	0.0330591	0.0213307	-12.1157	-12.6442	4.01788e-44	1.85583e-32
PPTG_24908		431.904	0.134085	0.0428578	-11.7903	-13.2139	3.08533e-41	1.14125e-26
PPTG_10171		125.103	0.0557307	0	-11.2696	-14.0701	1.60283e-49	3.60548e-30
PPTG_01112		192.267	0.105875	0.0173146	-10.9303	-13.3535	4.99752e-68	2.94475e-27
PPTG_12681		24.4333	8.35646	9.68306	-1.58239	-1.30445	1.05162e-13	1.29267e-09
PPTG_16180		74.5942	37.053	33.3649	-1.05162	-1.13291	2.5803e-06	3.69374e-07
PPTG_09737		46.5935	16.5855	14.7189	-1.53981	-1.62923	2.98054e-30	1.2338e-33
PPTG_18763		51.4212	12.2398	12.9414	-2.10903	-1.95983	3.56468e-09	4.88427e-08
PPTG_12576		123.546	0.112855	0.0695025	-10.2242	-10.7723	5.01146e-10	2.47329e-10
PPTG_19067		155.633	0.0916585	0	-10.8664	-13.6669	1.18117e-46	1.27407e-28
PPTG_00720		44.9605	92.5919	96.2297	1.0031	1.1352	0.00163218	0.000314039
PPTG_20417		115.233	0.0164751	0	-12.803	-13.7089	8.00401e-25	2.2972e-28
PPTG_24865		698.826	0.210298	0	-11.7335	-13.5332	6.34089e-28	4.80138e-28
PPTG_04425		66.1826	0.0336879	0	-11.0789	-12.8798	5.3736e-23	6.31969e-24
PPTG_24966		273.524	88.9644	96.9014	-1.65828	-1.46606	1.88204e-16	4.49368e-13
PPTG_04999		260.822	0.0446949	0	-12.5412	-13.4471	5.41345e-24	1.69607e-27
PPTG_10170		55.959	0.0223474	0	-11.4268	-13.2272	3.2107e-26	1.34229e-26
PPTG_20113		173.365	0.41063	0.0892179	-8.83527	-10.9069	1.59991e-26	3.94098e-22
PPTG_06897		57.2388	0.0124358	0	-12.1997	-13.1056	6.45686e-23	2.31356e-26
PPTG_17276		39.4521	0.0157015	0.148671	-11.4312	-8.04529	5.84321e-26	2.42709e-89
PPTG_24175		17.8235	1.16189	2.63297	-3.97852	-2.71845	6.07178e-07	0.000984204
PPTG_09759		47.557	0.0106718	0.069527	-12.1529	-9.39462	9.28482e-23	8.94402e-59
PPTG_14890		47.5205	0	0.0104305	-13.0862	-12.0685	4.36031e-26	2.65592e-22
PPTG_06836		21.8547	9.35624	9.45027	-1.26528	-1.17767	2.99872e-14	1.8001e-12
PPTG_17339		22.9778	8.79204	8.68803	-1.41782	-1.37472	4.31309e-07	1.0324e-06
PPTG_22207		356.087	0.150473	0.144288	-11.3447	-11.287	6.67433e-25	1.08335e-24
PPTG_11096		37.6311	1.28305	2.49381	-4.89326	-3.8887	6.05798e-36	1.19737e-24
PPTG_20450		126.535	0.0675986	0	-10.8729	-12.6731	5.83606e-24	1.33743e-24
PPTG_17293		34.5394	3.34152	3.9036	-3.40803	-3.11284	3.56907e-71	6.85718e-61
PPTG_24811		26.322	0.159919	0.0789431	-7.41848	-8.36086	2.43128e-97	1.5828e-69
PPTG_17215		48.5642	0.249667	0.125557	-7.64099	-8.58156	7.8175e-78	2.95876e-57
PPTG_08006		30.7919	9.29555	9.32195	-1.77799	-1.68937	0.000155005	0.000354439
PPTG_05562		108.464	0.099665	0	-10.2029	-12.5894	2.90535e-30	5.60063e-24
PPTG_02414		21.5528	0.00655568	0.00655854	-11.6522	-11.5963	1.0236e-20	1.59404e-20
PPTG_06832		15.7706	0	0	-12.4537	-12.3978	1.08277e-23	1.60982e-23
PPTG_12577		31.3326	0	0	-12.5118	-12.4559	1.0442e-23	1.5488e-23
PPTG_22882		16.8304	0.0495287	0.073195	-8.43656	-7.79931	1.26684e-47	1.6081e-55
PPTG_07891		25.8661	0.0104656	0	-11.3036	-12.2095	2.39994e-18	2.97205e-21
PPTG_07959		182.64	1.0821	1.18821	-7.47299	-7.23627	2.03762e-64	4.24377e-66
PPTG_05563		103.216	0.0414145	0	-11.3141	-12.22	1.15126e-19	8.45128e-23
PPTG_18357		8.1762	3.71219	2.96631	-1.1749	-1.43307	3.55731e-09	4.49368e-13
PPTG_17555		28.6046	0.0120058	0	-11.2493	-12.1552	3.75729e-19	3.20608e-22
PPTG_07888		27.4227	0	0	-12.0679	-12.012	3.80009e-22	5.80194e-22
PPTG_09758		45.1716	0.0236345	0	-10.9325	-11.8384	2.64957e-18	2.6466e-21
PPTG_05705		18.8212	0	0	-12.0425	-11.9866	3.50994e-22	5.38413e-22
PPTG_11162		10.4476	3.80101	3.98009	-1.50129	-1.36184	2.0688e-11	1.40172e-09
PPTG_19555		2.07692	4.4818	4.45811	1.06432	1.13385	1.98882e-09	1.37032e-10
PPTG_11593		24.3098	0.0310609	0	-9.74784	-12.1335	1.5004e-27	2.81277e-22
PPTG_10018		12.009	0.0781322	0.00582526	-7.2805	-10.8153	1.11826e-50	9.21806e-18
PPTG_24055		58.4268	0	0	-11.8165	-11.7606	3.49328e-21	5.35749e-21
PPTG_16181		13.6511	0	0.006388	-11.8839	-10.8662	1.38325e-21	3.4456e-18
PPTG_09741		30.7007	0.0192093	0	-10.6746	-11.5805	2.05842e-17	2.47522e-20
PPTG_24844		31.8805	2.99818	2.05467	-3.45858	-3.92371	4.83233e-41	3.26435e-49
PPTG_21384		15.5712	1.21108	1.23598	-3.71358	-3.6251	1.05184e-49	1.42028e-47
PPTG_18825		16.5584	0	0	-11.5133	-11.4574	6.70735e-20	1.03366e-19
PPTG_07932		27.2105	0	0.0298527	-11.7644	-9.85096	4.2668e-21	1.37481e-19
PPTG_22437		14.4458	0	0	-12.0644	-12.0085	7.53568e-22	1.16421e-21
PPTG_03273		19.2679	0.0238846	0.0554003	-9.79291	-8.41378	6.01724e-19	2.39799e-31
PPTG_19442		15.0343	2.14313	1.92888	-2.85846	-2.93423	9.40047e-28	8.44666e-29
PPTG_14060		15.9145	0	0	-11.8427	-11.7868	2.30482e-21	3.62711e-21
PPTG_06700		19.9228	0.0407601	0	-9.06827	-11.8694	6.91771e-30	4.76683e-21
PPTG_14654		18.6932	0.0241831	0.0143274	-9.72854	-10.2617	4.71858e-26	2.91833e-20
PPTG_05450		38.2423	0	0	-11.796	-11.7401	3.75516e-21	5.76217e-21
PPTG_14881		14.9344	0	0	-11.7075	-11.6516	6.96459e-21	1.06743e-20
PPTG_24862		38.4206	0.0443291	0	-9.89534	-11.6958	1.06835e-19	7.93191e-21
PPTG_02511		4.74849	0.0895258	0.0941756	-5.80731	-5.61907	6.86591e-63	4.53595e-62
PPTG_15772		15.8314	0	0.0429055	-11.3508	-8.44261	1.43042e-19	9.94685e-27
PPTG_00351		14.1433	0	0	-11.5539	-11.498	3.10622e-20	4.83697e-20
PPTG_02413		12.5022	0	0	-11.5767	-11.5208	2.0727e-20	3.22734e-20
PPTG_04054		17.8869	0	0	-11.3241	-11.2682	4.22428e-19	6.37978e-19
PPTG_23820		36.1737	0.0271939	0	-10.4091	-11.315	1.13788e-16	1.54786e-19
PPTG_04073		67.2464	0.159324	0	-8.85847	-11.2441	8.71612e-23	3.12441e-19
PPTG_16853		8.90601	3.69031	4.15362	-1.31612	-1.06878	3.67883e-24	1.10866e-16
PPTG_11392		14.6529	4.96736	5.76018	-1.60893	-1.30837	1.02473e-05	0.000429414
PPTG_02744		29.9025	0	0.0179895	-11.5208	-10.5031	3.73398e-20	6.64888e-17
PPTG_17853		11.2907	3.03358	3.77471	-1.93139	-1.54273	3.31104e-06	0.000260739
PPTG_04074		29.6569	0	0	-11.4362	-11.3803	6.4731e-20	9.98247e-20
PPTG_13643		30.4311	0.0237589	0	-10.3543	-11.2602	1.70123e-16	2.37306e-19
PPTG_17167		10.655	0.0167814	0	-9.44699	-11.2475	6.40635e-18	3.12441e-19
PPTG_01878		31.9206	0	0	-11.1009	-11.045	2.24409e-18	3.39289e-18
PPTG_24891		54.6018	0	0	-11.3347	-11.2788	1.81772e-19	2.73756e-19
PPTG_01507		21.4555	0.0153544	0	-10.4786	-11.3845	1.01729e-16	1.41473e-19
PPTG_11499		15.3983	0	0	-11.3649	-11.309	1.35166e-19	2.04739e-19
PPTG_24771		16.6732	0	0	-11.2083	-11.1524	4.31444e-19	6.55965e-19
PPTG_22232		71.1724	0	0	-11.1211	-11.0652	9.11526e-19	1.39746e-18
PPTG_16359		29.9596	0	0	-11.1769	-11.121	5.29769e-19	8.10702e-19
PPTG_23588		69.4595	0	0	-10.981	-10.9251	2.80649e-18	4.24584e-18
PPTG_01877		30.9987	0	0	-11.094	-11.0381	1.15734e-18	1.77618e-18
PPTG_05452		17.4345	0	0.0147735	-11.137	-10.1193	1.37589e-18	1.68112e-15
PPTG_18117		21.4841	0	0.0210035	-10.822	-9.8043	1.12782e-17	1.15071e-14
PPTG_21501		21.726	0.113826	0.284667	-7.68105	-6.24303	2.12897e-20	1.86036e-22
PPTG_17083		9.93025	0	0	-10.8324	-10.7765	1.1102e-17	1.65353e-17
PPTG_12488		22.6317	0.023269	0	-9.95707	-10.863	3.19074e-15	5.76613e-18
PPTG_06701		21.6292	0	0	-10.8392	-10.7833	8.34783e-18	1.25255e-17
PPTG_21144		33.2691	0	0	-10.9721	-10.9162	3.00833e-18	4.5578e-18
PPTG_14891		25.5328	0	0	-11.0767	-11.0208	2.39994e-18	3.61462e-18
PPTG_20246		15.4469	4.31437	3.03353	-1.90091	-2.31307	8.13072e-12	1.77006e-16
PPTG_24843		42.7245	0.0490672	0	-9.79745	-10.7034	1.76536e-14	4.05732e-17
PPTG_16665		15.2556	0	0	-10.8324	-10.7765	8.57828e-18	1.28466e-17
PPTG_03030		12.5011	0	0.01748	-11.3032	-9.39504	1.02184e-18	7.20914e-17
PPTG_24270		18.1287	0	0	-10.7269	-10.671	1.89953e-17	2.79784e-17
PPTG_22385		15.8212	0	0	-10.8404	-10.7845	1.3843e-17	2.06592e-17
PPTG_20477		12.6248	0.0426136	0.137229	-8.28155	-6.48499	1.62896e-19	6.4155e-32
PPTG_04158		21.7481	0.0221283	0	-9.97115	-10.8771	3.88004e-15	7.38956e-18
PPTG_22614		5.37015	0.0444305	0.0458207	-6.91329	-6.85266	3.56432e-30	1.06285e-29
PPTG_22068		5.23809	0.0130279	0.0371071	-8.78777	-7.1404	8.51892e-15	8.92649e-24
PPTG_15474		6.54228	0.922973	0.745475	-2.86362	-3.09962	2.939e-27	3.02728e-30
PPTG_06699		18.9305	0	0	-10.6762	-10.6203	3.16906e-17	4.63131e-17
PPTG_21846		14.1716	0	0	-10.5917	-10.5358	7.54139e-17	1.10187e-16
PPTG_21122		14.4948	0.0167814	0	-9.78492	-10.6908	1.26847e-14	2.72927e-17
PPTG_17827		8.76222	0.00931819	0	-9.84586	-10.7518	1.08112e-14	2.33617e-17
PPTG_07968		9.08008	0	0	-10.6697	-10.6138	3.15812e-17	4.61628e-17
PPTG_20948		38.0479	0.0367712	0	-9.83378	-10.7397	1.07789e-14	2.30466e-17
PPTG_14364		5.40162	0	0	-10.606	-10.5501	5.61134e-17	8.12769e-17
PPTG_21700		17.739	0	0	-10.7991	-10.7432	1.74964e-17	2.59633e-17
PPTG_22384		6.88661	0	0	-10.509	-10.4531	1.11909e-16	1.62359e-16
PPTG_11191		31.9231	0.0921262	0	-8.57311	-10.3738	1.22112e-14	2.84573e-16
PPTG_00682		8.19451	0	0	-10.5148	-10.4589	1.14717e-16	1.6639e-16
PPTG_16149		3.84897	0.0249445	0	-7.35507	-10.1622	1.777e-18	3.58135e-15
PPTG_07958		14.6687	0.123666	0	-7.01323	-10.1383	9.57254e-21	2.51107e-15
PPTG_24861		29.0935	0	0	-10.4086	-10.3527	3.1148e-16	4.45113e-16
PPTG_11601		10.5521	0.0289371	0.0257158	-8.6458	-8.59332	9.53279e-15	1.47906e-14
PPTG_21847		16.8247	0	0	-10.6904	-10.6345	7.93581e-17	1.15024e-16
PPTG_21145		28.3949	0.0813366	0	-8.58303	-10.3838	1.44387e-14	3.28244e-16
PPTG_12077		8.7987	0	0.00992807	-10.7225	-9.7048	7.10199e-17	5.61681e-14
PPTG_20693		16.5857	0	0	-10.1752	-10.1193	1.85683e-15	2.60381e-15
PPTG_15040		8.87929	0	0	-10.3869	-10.331	9.1862e-16	1.27506e-15
PPTG_13642		17.2101	0	0	-10.4465	-10.3907	2.21e-16	3.15847e-16
PPTG_10179		14.6761	0	0.0463273	-10.1964	-8.28131	5.63633e-15	6.86996e-13
PPTG_21101		5.05221	0	0	-9.92869	-9.8728	2.06769e-14	2.91354e-14
PPTG_06404		10.7375	0	0	-10.1566	-10.1007	1.91499e-15	2.69088e-15
PPTG_21969		59.644	0.324506	0	-7.59237	-9.98406	1.06059e-15	1.05378e-14
PPTG_24092		29.9664	0.0524905	0	-9.18778	-10.0937	9.99522e-13	3.55664e-15
PPTG_14502		4.96458	19.7995	17.1864	1.94954	1.82636	7.72029e-27	1.45163e-23
PPTG_16666		10.8493	0	0	-10.0723	-10.0164	3.58772e-15	5.00938e-15
PPTG_24860		2.9405	0	0.00536386	-10.0314	-9.01371	4.50572e-15	2.41981e-12
PPTG_20150		21.4574	0	0	-9.99694	-9.94104	8.86287e-15	1.2307e-14
PPTG_05417		4.31021	11.5318	11.4849	1.36252	1.44786	4.86114e-07	8.11505e-08
PPTG_17556		17.8929	0	0	-10.077	-10.0211	7.01826e-15	9.71888e-15
PPTG_20490		8.424	0	0	-10.1065	-10.0506	3.02557e-15	4.21798e-15
PPTG_21226		23.5201	0	0	-9.86764	-9.81174	3.11485e-14	4.4113e-14
PPTG_09190		17.763	2.08524	2.37016	-3.13899	-2.8679	3.38111e-17	6.77697e-15
PPTG_08265		8.63246	0.887768	0.945085	-3.33906	-3.1574	3.30988e-22	1.56565e-20
PPTG_14619		6.04619	2.05332	1.85929	-1.60581	-1.67177	2.16915e-12	4.36499e-13
PPTG_23110		30.5853	0	0	-9.73242	-9.67653	1.14133e-13	1.62376e-13
PPTG_03101		9.25878	0	0.0165848	-10.0563	-9.03857	4.64431e-15	2.43999e-12
PPTG_23759		22.4205	0.159324	0	-7.27361	-9.66011	5.48671e-14	1.43471e-13
PPTG_12320		19.8793	3.39856	2.77774	-2.61432	-2.80311	2.89142e-12	1.78828e-13
PPTG_02743		15.0195	0.078208	0	-7.58282	-9.94702	0.00077895	3.29464e-05
PPTG_22782		15.098	0	0	-9.85308	-9.79718	2.74383e-14	3.88713e-14
PPTG_21845		19.9606	0	0	-9.91845	-9.86255	1.2629e-14	1.7825e-14
PPTG_17297		3.6047	0	0	-9.53136	-9.47547	3.46279e-13	4.90411e-13
PPTG_06401		6.30756	0	0	-9.81962	-9.76373	2.59432e-14	3.67688e-14
PPTG_21564		7.5714	0.151305	0.473561	-5.67348	-3.98397	3.29964e-05	0.00293603
PPTG_23847		3.22522	0	0.0062004	-9.84472	-8.82702	2.25466e-14	9.85423e-12
PPTG_16266		7.4599	0.926644	1.05261	-3.06182	-2.79018	7.13202e-19	1.71494e-16
PPTG_06969		5.98089	0.450588	0.672936	-3.80075	-3.10987	4.08934e-09	8.83333e-07
PPTG_15041		11.251	0.0518872	0.0490171	-7.89679	-7.83904	2.82612e-12	3.99634e-12
PPTG_21120		25.725	0.0628669	0.26186	-8.49811	-6.55348	8.98666e-11	1.84694e-14
PPTG_24341		50.9496	14.6645	11.9039	-1.86104	-2.06639	1.23571e-11	1.76866e-13
PPTG_06355		4.21689	0	0	-9.38994	-9.33404	1.38763e-12	1.93468e-12
PPTG_23460		17.3648	0	0	-9.44531	-9.38941	9.25865e-13	1.29823e-12
PPTG_08263		17.2751	0	0	-9.57291	-9.51701	2.75766e-13	3.93238e-13
PPTG_06227		11.574	0	0	-9.88111	-9.82521	3.97479e-14	5.6654e-14
PPTG_10549		15.2757	0.0364047	0	-8.74441	-9.65031	2.16369e-11	1.08245e-13
PPTG_07465		7.38543	0.0170776	0.0151765	-8.7876	-8.7317	1.33717e-11	1.78867e-11
PPTG_18459		14.4331	0	0	-9.3576	-9.3017	2.12246e-12	2.88706e-12
PPTG_19584		5.00667	0	0.0235893	-9.66231	-7.74578	2.81114e-13	4.09646e-11
PPTG_04119		3.43885	0	0	-9.33607	-9.28017	3.1021e-12	4.18066e-12
PPTG_06899		1.72119	0	0	-9.68813	-9.63223	1.19824e-13	1.70238e-13
PPTG_22947		3.84423	1.63224	1.53259	-1.2825	-1.29232	1.59539e-06	1.51577e-06
PPTG_16292		2.15375	8.09234	8.2759	1.86089	1.97371	1.08961e-34	5.93738e-39
PPTG_06350		4.15387	0.0129594	0	-8.35756	-9.26346	7.19855e-10	6.28197e-12
PPTG_06400		4.71927	0	0.0192406	-9.76028	-7.85318	6.8798e-14	9.95597e-12
PPTG_24315		22.4016	0	0	-9.62549	-9.56959	1.22479e-13	1.7481e-13
PPTG_12723		4.8844	0	0	-9.5252	-9.46931	6.62931e-13	9.25006e-13
PPTG_24481		12.2679	0	0	-9.46803	-9.41214	9.14961e-13	1.28348e-12
PPTG_14927		4.94416	27.2566	25.9004	2.42172	2.42991	4.57366e-30	3.20479e-30
PPTG_21227		18.1338	0	0	-9.35737	-9.30147	9.8602e-13	1.38146e-12
PPTG_04330		7.54302	0	0	-9.35664	-9.30074	1.0279e-12	1.44435e-12
PPTG_03100		4.63348	0	0	-9.47566	-9.41976	4.03956e-13	5.72287e-13
PPTG_05065		2.47133	0	0	-9.35823	-9.30233	8.22335e-13	1.153e-12
PPTG_17137		15.5842	48.5633	35.2526	1.58964	1.21251	3.87003e-18	1.02872e-10
PPTG_14912		6.26933	325.22	336.121	5.65632	5.78322	4.27189e-137	2.15771e-143
PPTG_19637		8.44992	0	0	-9.4749	-9.419	5.21984e-13	7.34895e-13
PPTG_16294		3.71158	30.1675	28.3978	2.98192	2.962	4.4809e-26	9.8579e-26
PPTG_16006		8.15456	0	0	-9.6797	-9.62381	1.89184e-13	2.69198e-13
PPTG_19597		3.69854	0.439261	0.268608	-3.14362	-3.74788	1.91664e-13	4.76561e-16
PPTG_20313		14.7995	0.0475177	0	-8.31383	-9.21972	3.13933e-10	2.19748e-12
PPTG_21287		15.0143	7.35555	5.64508	-1.08059	-1.37809	0.000316135	4.24879e-06
PPTG_24388		1.23315	8.05527	8.56067	2.6574	2.83112	1.65032e-41	4.58642e-47
PPTG_23459		38.3391	0.122005	0	-8.32743	-9.23332	3.37804e-10	2.42224e-12
PPTG_03489		6.01123	1.79331	1.68172	-1.77363	-1.80233	8.04823e-06	6.14999e-06
PPTG_21217		14.4334	0	0	-9.19344	-9.13755	3.54487e-12	4.79029e-12
PPTG_23965		4.88704	0	0	-9.26402	-9.20812	2.00609e-12	2.75115e-12
PPTG_05047		2.05905	0	0	-9.36745	-9.31155	9.99522e-13	1.4028e-12
PPTG_13571		2.2232	27.0971	24.8116	3.56164	3.50716	1.16998e-46	4.10627e-45
PPTG_17212		2.7768	0	0	-9.03223	-8.97633	1.39136e-11	1.84286e-11
PPTG_21938		4.90172	0.0204262	0	-7.93891	-8.84481	5.65401e-09	6.31277e-11
PPTG_06270		7.91812	0.985302	0.611211	-3.0484	-3.66344	9.7231e-13	9.26717e-16
PPTG_23634		29.5416	1157.27	1282.9	5.26297	5.47676	5.54133e-98	3.84144e-106
PPTG_21579		13.6564	48.9722	41.7882	1.78492	1.64324	1.40388e-10	4.60428e-09
PPTG_11531		11.9113	0	0	-9.61936	-9.56346	5.75218e-13	8.04839e-13
PPTG_10146		9.63784	0.0295284	0	-8.16927	-9.07517	8.44191e-10	6.81991e-12
PPTG_04490		8.39473	0	0	-8.85489	-8.799	5.91996e-11	7.72682e-11
PPTG_07861		7.70623	0	0	-9.12112	-9.06523	7.40745e-12	9.85423e-12
PPTG_12319		2.8881	0.632308	0.657437	-2.25422	-2.09302	3.24221e-06	1.61526e-05
PPTG_21701		16.4109	0	0	-8.80997	-8.75408	1.22569e-10	1.58914e-10
PPTG_07726		8.91497	0.0669767	0.0954623	-7.15955	-6.51756	1.53603e-09	7.61479e-11
PPTG_05066		6.30089	0.0165963	0.0154424	-8.59786	-8.54197	1.75066e-10	2.28256e-10
PPTG_06120		11.3917	0.111005	0	-6.81431	-9.20158	3.87587e-11	1.09603e-11
PPTG_16295		1.81636	10.2021	8.60986	2.4307	2.2645	8.07906e-50	7.31563e-43
PPTG_01088		8.67843	0	0	-8.61017	-8.55427	5.81553e-10	7.57492e-10
PPTG_20283		7.15484	3.38477	2.51381	-1.15109	-1.47397	0.0113375	0.00110411
PPTG_01087		7.53377	0	0	-8.57869	-8.5228	8.15202e-10	1.06805e-09
PPTG_23044		2.30734	0.0110461	0.0805447	-7.74009	-4.79993	1.38655e-08	1.85138e-10
PPTG_13329		3.68977	0	0	-8.81585	-8.75995	6.94293e-11	9.09472e-11
PPTG_23332		1.40306	6.73045	6.23059	2.22386	2.18383	8.91441e-35	2.19381e-33
PPTG_03219		6.2291	0	0	-8.50363	-8.44773	1.2274e-09	1.59134e-09
PPTG_21121		10.481	0	0	-8.73155	-8.67565	1.79961e-10	2.34277e-10
PPTG_23857		18.4409	0	0	-8.77817	-8.72227	1.04602e-10	1.36187e-10
PPTG_14655		5.48797	1.83427	1.53686	-1.61828	-1.80018	1.43431e-05	1.89293e-06
PPTG_13926		10.5296	0	0.152342	-8.5206	-6.04134	2.27862e-09	8.77411e-08
PPTG_03155		5.16083	0	0	-8.63757	-8.58168	6.30252e-10	8.21382e-10
PPTG_12803		1.25283	0.0457031	0.0336651	-4.76539	-5.18962	1.1697e-08	5.40492e-09
PPTG_07589		5.56661	1.06232	1.19399	-2.4527	-2.18733	1.75167e-06	2.11393e-05
PPTG_18013		2.14303	0	0	-8.50414	-8.44824	1.13798e-09	1.4756e-09
PPTG_16225		19.1257	6.13234	7.72179	-1.66917	-1.27154	0.00240878	0.0238644
PPTG_19836		14.1131	0	0	-8.80682	-8.75092	7.7811e-11	1.01936e-10
PPTG_24858		6.64229	0.0361135	0	-7.55464	-8.46054	7.20941e-08	1.24351e-09
PPTG_22252		2.78532	0	0	-8.68432	-8.62842	1.98741e-10	2.60181e-10
PPTG_22305		8.18236	0.115412	0	-6.22174	-8.6028	1.84016e-08	1.11852e-09
PPTG_19260		13.3992	0	0	-8.56411	-8.50821	9.69651e-10	1.26365e-09
PPTG_24069		10.7489	0	0	-8.61933	-8.56344	6.18302e-10	8.0647e-10
PPTG_21242		12.8548	0	0	-8.84105	-8.78515	6.83232e-11	8.95076e-11
PPTG_17760		6.58194	0	0	-8.91102	-8.85512	4.36301e-11	5.72065e-11
PPTG_08264		5.37007	0	0	-8.89269	-8.83679	1.19775e-10	1.54883e-10
PPTG_09739		4.27971	0	0	-8.67705	-8.62115	2.29537e-10	2.9889e-10
PPTG_11208		2.3241	6.81387	6.33494	1.49956	1.47588	1.2629e-14	3.92007e-14
PPTG_04986		9.96441	0.103214	0.0738343	-6.63658	-7.00467	3.94616e-10	1.28308e-09
PPTG_17471		3.95422	0	0	-8.27993	-8.22403	1.34252e-08	1.748e-08
PPTG_24968		3.88473	0	0	-8.56535	-8.50945	1.38061e-09	1.78146e-09
PPTG_22176		7.60432	0	0	-8.94269	-8.88679	9.06595e-11	1.17879e-10
PPTG_20845		6.50081	0	0	-8.32682	-8.27093	6.59972e-09	8.54067e-09
PPTG_00204		10.3032	0	0	-8.60846	-8.55257	4.94267e-10	6.40928e-10
PPTG_08549		2.52243	0.552412	0.0124328	-2.22153	-7.46731	0.000639467	8.11505e-08
PPTG_23860		2.13464	0	0	-8.37829	-8.3224	3.19521e-09	4.14382e-09
PPTG_17048		3.15574	0	0	-8.17875	-8.12285	3.24157e-08	4.21208e-08
PPTG_17759		6.72223	0	0	-8.34852	-8.29262	3.53876e-09	4.60126e-09
PPTG_02004		1.57451	0	0	-8.09465	-8.03875	3.37462e-08	4.40426e-08
PPTG_16082		7.88558	0	0	-8.66678	-8.61089	4.29045e-10	5.56081e-10
PPTG_08605		4.81459	0.134356	0.0301629	-5.27672	-7.125	1.32806e-06	1.69407e-06
PPTG_03287		3.88817	0	0	-8.09068	-8.03478	3.50063e-08	4.56009e-08
PPTG_19089		3.52967	0	0	-8.1302	-8.0743	1.89322e-08	2.46974e-08
PPTG_13328		4.75056	0.153774	0.304367	-5.01655	-3.95183	1.6796e-08	1.21173e-07
PPTG_06021		1.95519	4.46142	4.61924	1.13766	1.27278	0.00108189	0.000218588
PPTG_06351		3.41279	0	0	-8.4084	-8.35251	2.55074e-09	3.31134e-09
PPTG_24359		8.92438	0	0	-7.88467	-7.82877	2.03496e-07	2.56829e-07
PPTG_08752		5.13632	0.027841	0	-7.34537	-8.25127	2.13196e-07	4.30603e-09
PPTG_24859		0.810698	0	0	-7.9066	-7.8507	1.9943e-07	2.51475e-07
PPTG_08500		2.04994	0	0	-8.01503	-7.95913	7.17572e-08	9.32381e-08
PPTG_13527		1.29564	0	0	-7.974	-7.9181	7.22869e-08	9.41375e-08
PPTG_03040		3.41895	0	0	-7.9677	-7.9118	5.48526e-08	7.18706e-08
PPTG_16485		4.3038	1.26891	0.354745	-1.84069	-3.5907	0.00888887	1.15009e-05
PPTG_11709		0.0413385	1.4053	1.43662	5.03864	5.16071	2.00746e-59	2.9017e-62
PPTG_22812		1.31385	0.0208436	0	-5.92014	-7.70324	1.55597e-05	2.34084e-07
PPTG_24570		0.551889	0	0.0397831	-7.25265	-3.75588	1.81349e-06	0.0004813
PPTG_02027		3.31502	0	0	-7.97131	-7.91541	2.24188e-07	2.82924e-07
PPTG_13244		2.83941	0	0	-8.19974	-8.14384	2.30297e-08	2.98991e-08
PPTG_14620		4.27443	1.83602	1.64913	-1.28426	-1.33855	0.0079242	0.00609129
PPTG_02026		3.56661	0	0	-7.77288	-7.71698	1.9056e-07	2.41648e-07
PPTG_21821		11.2477	0	0	-7.95277	-7.89687	1.23439e-07	1.57315e-07
PPTG_00371		1.74303	76.6804	88.1082	5.43548	5.70218	1.90438e-14	8.02777e-16
PPTG_02513		0.907076	0.22981	0.103017	-2.02746	-3.12553	0.00329367	3.00124e-05
PPTG_22361		4.74793	0.16654	0.41712	-4.87802	-3.46947	1.82808e-06	8.03805e-05
PPTG_21678		4.76236	0	0	-7.78356	-7.72766	1.91807e-07	2.43117e-07
PPTG_06026		1.31521	4.59808	4.34186	1.74448	1.7606	7.17652e-07	5.8252e-07
PPTG_20779		5.38568	0	0	-7.60527	-7.54937	2.43361e-06	3.03696e-06
PPTG_08446		1.81737	0	0	-7.88354	-7.82764	2.33282e-07	2.95122e-07
PPTG_21234		4.1984	0.0856648	0	-5.56707	-7.34137	0.000346913	8.68752e-06
PPTG_22327		8.72401	0	0	-7.52931	-7.47341	4.93915e-06	6.07522e-06
PPTG_14259		6.55461	0.439812	0.139883	-3.8961	-5.52607	0.0001997	1.54522e-05
PPTG_13928		1.8355	0	0	-7.36085	-7.30495	3.19104e-05	3.83977e-05
PPTG_09738		3.86086	0	0	-7.48216	-7.42626	6.4535e-06	7.8797e-06
PPTG_19816		1.09697	4.47783	3.48464	1.94556	1.67256	2.79212e-05	0.000438033
PPTG_05076		2.51521	0.0493386	0.0785591	-5.61188	-4.95632	2.60232e-05	2.09277e-05
PPTG_22218		0.635096	0.0131366	0	-5.6948	-7.50289	1.53066e-05	2.26142e-07
PPTG_09734		2.37783	0	0	-7.09201	-7.03611	0.000308447	0.000354439
PPTG_20915		1.42059	0	0.056745	-7.11356	-4.61552	2.53478e-06	0.000198092
PPTG_15849		1.01115	0	0	-7.20138	-7.14548	0.00011189	0.000131495
PPTG_00013		1.00231	0.204632	0.137476	-2.34322	-2.8298	0.000853721	8.55159e-05
PPTG_23880		1.77668	0	0	-7.12392	-7.06802	0.000226301	0.00026276
PPTG_21019		4.88358	0	0	-7.74796	-7.69207	1.64696e-06	2.05738e-06
PPTG_20889		3.53815	0	0	-7.22628	-7.17038	7.42834e-05	8.7922e-05
PPTG_03162		1.02924	0	0.0229238	-7.31042	-5.4238	1.26059e-05	0.000654
PPTG_18335		1.88505	0	0	-7.5508	-7.49491	1.81998e-06	2.2838e-06
PPTG_21888		3.42837	0.345827	0.0339058	-3.40177	-6.57098	0.000189741	9.72974e-06
PPTG_07672		2.96913	0	0	-6.74739	-6.69149	0.00331444	0.00373737
PPTG_24609		4.72729	0	0	-7.03671	-6.98081	0.000408992	0.000470551
PPTG_19965		2.85733	0	0	-7.12707	-7.07117	0.000207085	0.000241676
PPTG_23913		4.27494	0.43622	0.112115	-3.3074	-5.23793	8.98278e-06	1.07361e-06
PPTG_06399		0.69592	0.0092951	0.0103227	-6.04351	-5.98762	0.000592712	0.0006917
PPTG_06324		0.659873	0	0	-6.55562	-6.49973	0.00972615	0.010794
PPTG_19758		1.19872	0	0	-6.84159	-6.78569	0.000368135	0.000424496
PPTG_22659		2.17991	0	0	-6.46742	-6.41152	0.0135537	0.0150549
PPTG_00012		0.747048	0.0324099	0.0790461	-4.58718	-3.20658	8.28168e-06	0.000144133
PPTG_06744		2.37602	0	0	-7.83432	-7.77842	7.10935e-08	9.28311e-08
PPTG_08485		0.353431	6.3559	6.01576	4.14589	4.14844	4.59186e-44	5.18526e-44
PPTG_05884		1.93015	0	0	-6.21229	-6.15639	0.0321658	0.0354145
PPTG_23222		1.85634	0	0	-6.29802	-6.24212	0.0043565	0.00492825
PPTG_06623		2.28638	0	0	-6.77947	-6.72357	0.00283908	0.00319766
PPTG_22636		1.55114	0	0	-6.50781	-6.45192	0.0117153	0.0129907
PPTG_24128		1.74768	0.560014	0.331156	-1.71233	-2.36021	0.0262431	0.00244791
PPTG_10367		2.19415	13.2059	10.3828	2.55869	2.29915	1.98859e-19	1.14195e-15
PPTG_14931		0.799197	78.9235	83.6785	6.5749	6.75819	3.38742e-17	4.04596e-18
PPTG_21264		2.42624	0	0	-6.32679	-6.27089	0.0211182	0.0232338
PPTG_03450		2.28491	0.397618	0.157118	-2.63808	-3.81816	0.0406836	0.00860692
PPTG_20700		1.31546	0.255598	0.121212	-2.42739	-3.3943	0.0409049	0.00929613
PPTG_18545		0.594001	1.39439	1.35464	1.19923	1.24396	0.0335902	0.0278876
PPTG_12519		0.734487	0	0.0197655	-6.14929	-5.1316	0.00865648	0.0330803
PPTG_11094		0.675818	0.11225	0.0456675	-2.64138	-3.84066	0.0117153	0.00224595
PPTG_22576		1.91412	0	0	-6.79748	-6.74158	0.000376031	0.000433709
PPTG_07889		1.34643	0	0	-6.80082	-6.74492	0.00258596	0.00291077
PPTG_09740		1.04835	0	0	-6.22718	-6.17128	0.0296188	0.0325989
PPTG_09453		1.0082	0	0	-6.2818	-6.2259	0.024075	0.0264979
PPTG_14538		1.04033	0	0	-6.29344	-6.23754	0.0234558	0.025843
PPTG_08656		1.67846	0.0257953	0	-6.0501	-6.956	0.000357019	3.25943e-05
PPTG_23574		1.31966	0	0	-6.4499	-6.394	0.0133322	0.0148223
PPTG_18826		0.517745	0	0.0108817	-6.46055	-5.44286	0.00194077	0.0107123
PPTG_15163		0.615705	0.00695246	0.0131955	-6.43609	-5.49086	5.0227e-05	0.00017859
PPTG_23914		10.5291	0.863996	1.90959	-3.65433	-2.42824	9.87155e-05	0.00532017
PPTG_23638		0.301446	97.9968	81.8674	8.29599	8.12185	3.28586e-193	5.13875e-185
PPTG_22507		0.688264	0	0	-6.26789	-6.21199	0.0258302	0.0284512
PPTG_13804		0.369947	0.0571288	0.11553	-2.78039	-1.64609	0.00209452	0.0475213
PPTG_24423		2.00709	0	0	-5.82486	-5.76896	0.0261736	0.028922
PPTG_21762		1.07818	0	0	-6.32975	-6.27385	0.0211951	0.0233042
PPTG_18366		2.05119	0	0.0906554	-6.37061	-4.46224	7.17259e-05	0.00325131
PPTG_11168		1.03565	0	0	-6.43752	-6.38162	0.0148348	0.0164636
PPTG_24909		1.38197	0.143407	0.101134	-3.31297	-3.70448	0.0068406	0.00501269
PPTG_05451		1.50508	0	0	-6.20151	-6.14561	0.0317503	0.0349431
PPTG_23287		1.30187	2.70353	2.6343	1.00069	1.05189	0.0414718	0.0323516
PPTG_25045		1.39396	0	0.0285737	-6.49674	-5.47905	0.000183937	0.00199339
PPTG_19235		1.18656	0	0	-6.24295	-6.18705	0.0299122	0.0329102
PPTG_16854		0.0868366	0	0	-5.31212	-5.25622	0.0192981	0.0215358
PPTG_23781		0.827391	0.0315054	0.0292111	-4.68598	-4.63009	0.0116483	0.013262
PPTG_14308		0.0854359	1.42393	1.19349	4.0442	3.87492	1.88342e-14	3.04948e-13
PPTG_23062		0.364138	71.3404	67.1278	7.52982	7.53984	5.25358e-37	4.64227e-37
PPTG_10127		0.0878382	0.703574	0.499948	2.99116	2.56918	0.00251937	0.0115857
PPTG_19101		0.213991	0.71102	0.99535	1.6603	2.23629	0.000307869	3.30466e-07
PPTG_23901		0.970618	0	0.0343543	-5.74843	-4.73074	0.00580945	0.0271962
PPTG_02251		0.106149	7.99973	7.22402	6.08267	6.01802	8.86627e-21	2.48213e-20
PPTG_03486		0.246761	26.1234	22.0847	6.68758	6.52767	5.40696e-65	8.61084e-62
PPTG_23811		0.113711	0.520851	0.498902	2.13564	2.16393	0.0122141	0.0114506
PPTG_13530		0.0532486	4.89949	5.04243	6.39318	6.52017	1.52146e-12	5.19142e-13
PPTG_03590		0.139982	100.065	93.3878	9.32087	9.32205	3.47223e-50	3.98599e-50
PPTG_13659		0.0545165	120.947	106.914	11.0039	10.9247	4.99752e-68	5.95533e-67
PPTG_14929		0.100151	2.65106	2.39013	4.72333	4.66016	8.4045e-10	1.52251e-09
PPTG_23647		0.135866	22.9893	28.2233	7.28487	7.67001	7.17309e-11	5.65485e-12
PPTG_05418		0.0963857	208.599	205.854	11.0758	11.1522	4.16196e-75	4.94282e-76
PPTG_14933		0.0478281	1.55143	2.13297	4.86385	5.42246	0.000105889	1.19089e-05
PPTG_06927		0.0676286	3.79956	2.36616	5.64236	5.05748	1.1956e-08	4.59339e-07
PPTG_14928		0.0656444	9.81719	9.62117	7.16905	7.22058	1.85834e-20	9.72179e-21
PPTG_04512		0.0334196	11.1918	11.6332	8.23904	8.38227	2.06871e-13	7.50919e-14
PPTG_00596		0.0280584	46.5571	40.9673	10.5529	10.442	6.81121e-23	1.90409e-22
PPTG_00372		0.031861	68.2373	70.2963	11.032	11.1357	5.61328e-40	1.19495e-40
PPTG_05444		0.0385576	0.536915	0.50171	3.64767	3.64232	0.00243336	0.0025787
PPTG_03000		0.0124542	18.5784	19.2578	10.2806	10.4183	3.25562e-15	1.27696e-15
PPTG_14907		0.0389347	46.5461	38.2949	10.259	10.0661	1.49122e-21	8.78722e-21
PPTG_22434		0.0624007	336.594	299.335	12.133	12.0441	8.24472e-23	1.67573e-22
PPTG_21593		0.0415933	102.607	84.2337	11.3059	11.1075	3.61482e-26	2.74013e-25
PPTG_21673		0	0.461669	0.406391	3.7865	3.65576	0.0343357	0.0453448
PPTG_01528		0	0.211746	0.135363	4.3822	3.82883	0.0121145	0.0360807
PPTG_23118		0	0.774972	0.809074	4.25065	4.4286	0.0470821	0.0385855
PPTG_24869		0	0.880956	0.630343	4.70054	4.32338	0.0231072	0.0419623
PPTG_23651		0	0.711035	0.788744	4.39682	4.66008	0.0257711	0.017545
PPTG_19210		0	0.706641	1.37332	4.10124	5.16852	0.0170252	0.00159813
PPTG_18499		0	0.435211	0.777421	4.23295	5.17365	0.018797	0.00284259
PPTG_20717		0	0.53868	0.46581	4.87588	4.76522	0.00313723	0.00425102
PPTG_23930		0	0.827515	1.49273	4.3657	5.32547	0.0151303	0.00211754
PPTG_16660		0	0.234821	0.213418	4.99244	4.92349	0.00757516	0.00895555
PPTG_10134		0	0.159795	0.159298	5.06535	5.15443	0.00334543	0.00284987
PPTG_13294		0	0.755566	1.00389	4.87793	5.37247	0.00151842	0.00037981
PPTG_22463		0	0.379662	0.276018	5.30045	4.9343	0.000434734	0.00130791
PPTG_07017		0	0.247475	0.18447	5.54822	5.18511	0.000231981	0.000711512
PPTG_14467		0.0410445	0.266504	0.369482	2.77194	3.31297	0.027036	0.00652249
PPTG_02453		0	1.00212	0.330745	6.18135	4.67104	0.000118457	0.00599412
PPTG_04959		0	0.629135	0.432507	5.9531	5.53283	0.000151672	0.000521505
PPTG_20159		0.0261067	0.70599	0.587846	4.86508	4.67505	0.000590606	0.00108098
PPTG_18918		0	1.62686	0.271477	6.67776	4.1662	1.15088e-06	0.00630733
PPTG_12639		0	0.821895	1.38342	5.5016	6.36971	0.00343204	0.000546497
PPTG_05420		0	0.618459	0.769977	5.78956	6.17377	3.32743e-05	8.09841e-06
PPTG_13295		0	0.314286	0.532378	5.54634	6.37622	8.73363e-05	4.04314e-06
PPTG_01855		0	0.262822	0.485908	5.52308	6.4638	0.000108376	3.43824e-06
PPTG_19865		0	0.388347	0.320427	6.20007	6.02224	2.27417e-05	4.41806e-05
PPTG_01856		0	0.531801	0.269258	6.58489	5.69402	1.27714e-06	4.49135e-05
PPTG_13293		0.0237293	0.806064	1.43506	4.79697	5.71772	0.00604047	0.000800921
PPTG_14692		0	1.96734	1.71572	6.43342	6.31273	2.41722e-06	4.16058e-06
PPTG_14926		0.0326278	2.88897	0.971777	6.16231	4.69039	6.5317e-06	0.00103193
PPTG_05446		0	1.2516	0.699751	6.99862	6.24589	1.14625e-06	1.983e-05
PPTG_04236		0	1.74429	1.14649	6.94155	6.43507	9.28893e-07	6.95118e-06
PPTG_03377		0	2.6188	1.313	7.10095	6.20494	3.73467e-07	1.32664e-05
PPTG_14192		0	1.04693	1.18055	6.58998	6.85024	1.56691e-06	5.45745e-07
PPTG_14304		0	1.62185	1.80899	6.64668	6.90005	7.33724e-07	2.50805e-07
PPTG_20320		0	2.62684	1.89913	6.99213	6.59933	3.23716e-07	1.75813e-06
PPTG_16556		0	0.523501	0.297819	7.1452	6.4015	8.35257e-08	2.29216e-06
PPTG_24046		0	3.09376	1.86573	7.16997	6.50987	8.22317e-08	1.57496e-06
PPTG_01854		0	0.499073	0.619259	6.80684	7.19784	3.59582e-07	6.31826e-08
PPTG_20431		0	1.12538	1.26421	6.90297	7.13973	3.08317e-07	1.10309e-07
PPTG_02454		0	1.39918	2.31281	6.69439	7.48406	3.66222e-05	3.04866e-06
PPTG_18919		0	2.10038	1.97035	7.1576	7.14964	6.01366e-08	6.55902e-08
PPTG_24327		0	9.42511	9.39321	7.1606	7.22662	1.48147e-07	1.14577e-07
PPTG_12518		0	1.39806	1.26906	7.22733	7.175	9.81201e-08	1.29014e-07
PPTG_04513		0.0294387	2.54779	3.34594	6.13621	6.61789	4.23558e-06	5.86012e-07
PPTG_02455		0	1.53821	2.49052	6.97148	7.72748	3.46119e-06	2.06387e-07
PPTG_04237		0	3.28491	2.90192	7.45934	7.37074	1.47482e-08	2.35404e-08
PPTG_18354		0.0598026	4.89028	4.8229	6.45473	6.51843	1.28656e-06	1.02131e-06
PPTG_17121		0.064697	1.74991	1.21778	4.86478	4.42576	1.49292e-08	3.69128e-07
PPTG_13528		0	0.469519	0.483346	7.57716	7.71465	9.2161e-09	4.77159e-09
PPTG_16952		0	1.96302	1.65168	7.78463	7.61921	2.1597e-09	5.11054e-09
PPTG_12971		0	1.73804	1.60977	7.751	7.72393	4.11251e-09	4.78514e-09
PPTG_21008		0	9.28736	7.84734	7.82645	7.6846	2.79581e-09	5.78088e-09
PPTG_19554		0	0.38619	0.400364	7.69686	7.82484	2.90247e-09	1.49852e-09
PPTG_23738		0	3.90731	3.99782	7.81256	7.94404	4.68092e-09	2.45116e-09
PPTG_22514		0	4.91247	6.29665	7.72845	8.17684	1.8261e-09	1.59615e-10
PPTG_20860		0	9.03505	7.48187	8.0655	7.87585	4.14762e-10	1.14126e-09
PPTG_02930		0	5.92457	4.38236	8.17248	7.8319	2.63066e-10	1.61573e-09
PPTG_23980		0	1.53421	1.27784	8.20002	8.03003	2.14626e-10	5.38615e-10
PPTG_20228		0	3.52467	3.68566	8.05613	8.21665	1.02424e-09	4.41899e-10
PPTG_24708		0	1.94324	2.08285	8.22956	8.39599	2.40341e-10	9.58964e-11
PPTG_23220		0	3.40851	2.81619	8.52068	8.32971	4.85155e-11	1.3673e-10
PPTG_08686		0	5.8356	6.58327	8.29759	8.55106	6.88652e-11	1.5619e-11
PPTG_20861		0	9.53869	8.09675	8.51655	8.36883	2.43479e-11	5.59194e-11
PPTG_02522		0	2.73866	2.38445	8.53751	8.42508	3.45849e-11	6.41198e-11
PPTG_14303		0	3.37492	3.4659	8.44619	8.56266	5.97551e-11	3.03211e-11
PPTG_21307		0	0.497665	0.508725	8.4883	8.59576	2.90236e-11	1.52339e-11
PPTG_02929		0	7.27663	7.42533	8.51001	8.61501	1.71331e-11	9.03421e-12
PPTG_02015		0	4.50419	3.53951	8.7513	8.49513	6.71596e-12	2.95065e-11
PPTG_09382		0	5.23729	5.33034	8.59385	8.7091	2.78721e-11	1.40838e-11
PPTG_22374		0	24.2147	2.57308	9.49588	6.35612	5.3927e-13	3.59265e-06
PPTG_19553		0	1.61178	1.60356	8.72911	8.80892	5.59263e-12	3.41733e-12
PPTG_08229		0	5.32678	5.01759	8.80335	8.7944	2.94171e-12	3.07873e-12
PPTG_18339		0	6.6616	7.09662	8.77327	8.95409	2.96898e-11	1.05322e-11
PPTG_12710		0	1.37899	1.01064	9.08968	8.70736	7.96602e-13	7.92648e-12
PPTG_14925		0	3.8156	2.96595	9.11231	8.81843	8.55363e-13	5.00778e-12
PPTG_08788		0	5.78248	6.44762	8.84552	9.0977	8.42344e-12	1.92299e-12
PPTG_23335		0	33.1424	34.5788	9.02472	9.18995	1.09299e-10	4.60678e-11
PPTG_23659		0	15.9703	21.7203	8.82091	9.326	7.97394e-12	3.93192e-13
PPTG_09381		0	2.96863	3.05946	9.12404	9.24772	1.27354e-12	6.16085e-13
PPTG_12969		0	3.62654	3.28627	9.27916	9.21526	1.35434e-13	2.07746e-13
PPTG_05448		0	10.5264	9.01512	9.355	9.21969	1.23184e-13	2.97408e-13
PPTG_21023		0	16.7758	15.4018	9.34766	9.33061	9.86069e-13	1.11199e-12
PPTG_14936		0	8.20689	7.68559	9.41385	9.40377	8.82431e-14	9.51785e-14
PPTG_11708		0	3.80747	3.70608	9.39772	9.43652	2.62665e-13	2.1089e-13
PPTG_06383		0.0418132	11.6514	16.3947	8.24323	8.79977	1.90578e-10	8.37518e-12
PPTG_15356		0	3.90307	4.20642	9.51822	9.69706	6.20612e-12	2.32582e-12
PPTG_08709		0	19.7614	22.6406	9.44619	9.72348	5.26182e-14	8.47375e-15
PPTG_14932		0	19.3271	20.3835	9.56882	9.7269	2.24137e-12	9.28547e-13
PPTG_21007		0	13.2764	14.0327	9.6877	9.84133	1.473e-14	5.26481e-15
PPTG_24461		0	32.5772	27.5984	9.84507	9.70025	1.07669e-14	2.71968e-14
PPTG_08230		0	12.9464	11.3536	9.83813	9.73011	3.58772e-15	7.20019e-15
PPTG_21006		0	27.6216	28.7668	9.7833	9.91243	7.21364e-15	2.96717e-15
PPTG_02999		0.032093	25.6408	27.0146	9.36037	9.51127	1.15979e-12	4.87594e-13
PPTG_08944		0	14.5106	13.4488	10.6178	10.5958	2.76087e-17	3.20521e-17
PPTG_23401		0	10.2393	9.14389	10.6533	10.5673	1.20094e-17	2.25876e-17
PPTG_08945		0	22.3717	21.6278	11.0514	11.0988	4.46581e-18	3.22027e-18
PPTG_23334		0.0463335	49.7808	49.3102	10.1526	10.2411	1.91172e-15	1.01906e-15
PPTG_12638		0.0354329	24.8633	34.2123	9.36022	9.90749	1.2676e-06	2.69936e-07
PPTG_23470		0	146.908	181.402	11.3395	11.7153	4.78369e-19	2.87279e-20
PPTG_11431		0	21.797	29.9701	12.3755	12.9092	5.1615e-23	5.32827e-25
PPTG_12037		0.0611772	265.409	223.575	11.7789	11.6259	3.60788e-21	1.1923e-20
PPTG_14848		0	138.957	144.216	12.9715	13.1151	9.79058e-26	2.65106e-26
PPTG_19710		0.282412	311.691	270.843	10.0108	9.90087	4.30072e-47	5.67712e-46
PPTG_14207		0.0352262	92.2832	116.59	11.5687	11.9843	1.03119e-25	1.49918e-27
PPTG_13069		3046.1	238.624	195.123	-3.73366	-3.93544	2.53813e-34	5.5348e-38
PPTG_19007		2523.27	1034.78	1045.28	-1.33043	-1.24027	1.4305e-15	1.19133e-13
PPTG_00099		2213.25	917.752	979.568	-1.30765	-1.14433	2.3293e-06	4.5513e-05
PPTG_22908		1395.78	3040.06	2741.68	1.08029	1.00485	4.82978e-21	2.56243e-18
PPTG_04590		779.568	261.829	341.968	-1.60537	-1.15894	4.85727e-11	3.49154e-06
PPTG_05833		2190.15	913.188	949.576	-1.31102	-1.17227	1.53548e-08	5.29389e-07
PPTG_09470		180.562	380.695	455.101	1.0407	1.36334	2.11521e-05	1.33533e-08
PPTG_16172		1239.08	352.55	352.899	-1.85797	-1.77523	5.40566e-05	0.000127002
PPTG_05834		800.071	36.5801	59.4683	-4.48627	-3.7127	8.49813e-13	4.8445e-09
PPTG_18272		399.213	169.624	193.052	-1.2775	-1.01677	4.50013e-15	7.07737e-10
PPTG_02462		153.841	378.896	448.96	1.25477	1.58066	0.000330267	3.92171e-06
PPTG_07422		205.822	30.3751	28.1411	-2.80181	-2.84078	4.61272e-27	8.40856e-28
PPTG_13482		579.353	53.6116	87.0469	-3.47294	-2.69815	3.07571e-08	2.5032e-05
PPTG_03121		348.826	1020.13	987.741	1.50711	1.53526	2.02209e-14	6.14205e-15
PPTG_07817		344.661	100.812	114.456	-1.81155	-1.55888	1.26841e-16	1.55663e-12
PPTG_06045		825.931	225.634	230.761	-1.92147	-1.80911	8.9665e-08	5.50156e-07
PPTG_11432		345.384	122.799	150.04	-1.52592	-1.17291	1.02191e-09	4.16175e-06
PPTG_04240		345.313	176.328	161.24	-1.01439	-1.06703	1.49429e-33	5.60317e-37
PPTG_23419		271.925	28.9298	28.5757	-3.26964	-3.21668	3.16761e-36	5.01542e-35
PPTG_11387		902.416	147.245	280.938	-2.64173	-1.65063	4.14938e-11	6.88086e-05
PPTG_06934		350.998	1013.54	1145.43	1.48408	1.7469	0.0496712	0.0191881
PPTG_12230		570.952	157.074	117.939	-1.91034	-2.24601	6.55026e-11	9.32355e-15
PPTG_22501		46.9764	21.2083	22.9218	-1.19628	-1.00357	1.65697e-06	7.74478e-05
PPTG_24866		1460.01	26.5855	16.8408	-5.84039	-6.40897	5.07445e-107	1.21702e-126
PPTG_01657		991.759	35.2194	38.2586	-4.86289	-4.65305	1.21852e-13	1.45818e-12
PPTG_13257		293.209	684.112	599.725	1.17628	1.06187	8.3433e-07	1.05793e-05
PPTG_17393		183.462	70.4987	75.6067	-1.4231	-1.24666	7.31405e-26	4.76903e-20
PPTG_11437		464.309	1007.86	1297.35	1.08609	1.51499	0.00520251	5.64452e-05
PPTG_06756		586.538	159.051	128.049	-1.93082	-2.16501	3.30677e-08	4.39868e-10
PPTG_07417		130.854	24.2697	23.3369	-2.47793	-2.45579	3.32359e-26	9.27211e-26
PPTG_01097		191.494	87.8914	83.3825	-1.16325	-1.16571	6.09789e-11	5.43675e-11
PPTG_04382		196.362	34.2137	33.5201	-2.56542	-2.52102	2.88311e-29	2.93429e-28
PPTG_20132		419.314	200.426	194.081	-1.11097	-1.08109	3.7624e-13	1.71517e-12
PPTG_08683		201.261	523.488	457.773	1.33699	1.21389	0.000228276	0.000943478
PPTG_06246		238.221	102.31	109.447	-1.2567	-1.09185	1.30912e-06	3.36516e-05
PPTG_00169		317.703	101.938	90.9654	-1.68306	-1.77622	1.05196e-11	6.18783e-13
PPTG_02501		225.752	109.114	100.35	-1.09512	-1.13707	3.71289e-30	2.09989e-32
PPTG_08041		623.071	160.964	140.869	-1.97876	-2.11281	0.00743219	0.00413542
PPTG_11386		582.278	117.679	222.896	-2.32812	-1.35444	2.93514e-07	0.00470555
PPTG_12180		510.565	229.981	210.264	-1.20498	-1.24659	7.04014e-11	1.37132e-11
PPTG_02874		224.733	111.496	94.6921	-1.05613	-1.21876	0.00120958	0.000156223
PPTG_15665		333.227	720.241	783.827	1.06461	1.26534	0.000204338	7.50107e-06
PPTG_00165		141.069	24.2367	25.5046	-2.57895	-2.43684	3.97467e-21	5.79929e-19
PPTG_06857		74.885	34.8972	36.1913	-1.14074	-1.01876	4.58186e-07	8.22333e-06
PPTG_17884		172.13	501.317	530.978	1.50125	1.66156	3.38119e-06	2.28526e-07
PPTG_17697		317.357	69.0589	64.7863	-2.22585	-2.25757	0.0281989	0.0267587
PPTG_03504		206.05	636.678	886.798	1.59033	2.14979	0.0377138	0.00379337
PPTG_05028		145.881	72.3512	69.1504	-1.05489	-1.04416	3.5443e-18	8.08432e-18
PPTG_01517		295.914	110.186	95.4734	-1.46873	-1.60043	1.07308e-16	1.22643e-19
PPTG_03113		236.903	17.8064	14.0979	-3.76707	-4.03215	3.87367e-32	1.24296e-36
PPTG_03087		267.088	112.485	89.7433	-1.29361	-1.54281	2.79612e-09	8.1105e-13
PPTG_09134		360.677	90.4278	90.5534	-2.04318	-1.96371	1.69429e-35	8.35073e-33
PPTG_22132		413.609	97.7202	116.769	-2.12031	-1.79264	5.27628e-19	7.53017e-14
PPTG_18368		171.598	36.8385	34.1115	-2.25165	-2.30417	2.64948e-11	8.37518e-12
PPTG_22298		168.231	7.00221	8.13555	-4.61938	-4.34361	1.60864e-52	1.5221e-46
PPTG_01000		606.349	291.978	281.327	-1.1025	-1.07401	1.37144e-13	6.21224e-13
PPTG_04380		128.156	469.64	604.13	1.83385	2.27846	0.0105344	0.00117357
PPTG_00979		141.558	346.253	350.567	1.23571	1.34444	0.0311055	0.0185288
PPTG_19098		140.772	47.106	57.4336	-1.61901	-1.26002	1.30527e-19	3.01162e-12
PPTG_18784		194.167	72.7217	81.2874	-1.47386	-1.2166	0.000559619	0.00541042
PPTG_13120		215.927	42.5647	48.9193	-2.38924	-2.10219	7.68826e-10	8.23686e-08
PPTG_10778		320.12	117.684	139.308	-1.46407	-1.17608	0.000968602	0.00997004
PPTG_09516		271.518	573.506	545.91	1.03647	1.03997	7.7811e-11	6.54269e-11
PPTG_05026		158.011	337.835	319.255	1.06095	1.04577	0.00197919	0.00241343
PPTG_05552		194.055	662.774	967.869	1.74339	2.34885	2.99889e-06	1.35208e-10
PPTG_10502		89.7142	37.4897	36.7886	-1.29613	-1.25445	7.76466e-17	7.8903e-16
PPTG_12304		221.192	85.251	86.1138	-1.42065	-1.32897	6.94504e-14	2.89595e-12
PPTG_00628		267.713	42.2894	40.4172	-2.69592	-2.69727	7.32502e-30	7.64696e-30
PPTG_03997		253.249	94.2762	98.7148	-1.47512	-1.32625	4.97925e-08	1.17511e-06
PPTG_07273		136.157	49.7583	53.0734	-1.49434	-1.32629	8.53146e-07	1.54534e-05
PPTG_13220		36.3418	9.16712	9.10189	-2.02429	-1.96625	7.54095e-18	6.83165e-17
PPTG_02177		112.77	727.626	1412.47	2.67329	3.68137	0.0073931	0.000141148
PPTG_17805		568.009	1187.65	1197.2	1.01914	1.10665	0.00670272	0.00307117
PPTG_22853		96.6191	20.7695	18.8403	-2.26408	-2.32502	8.5743e-12	2.19037e-12
PPTG_24800		926.761	349.893	404.447	-1.43328	-1.17008	7.06794e-06	0.000327699
PPTG_18451		124.334	649.991	842.61	2.35355	2.78999	1.56159e-07	3.19292e-10
PPTG_11184		73.9299	25.7577	29.0107	-1.55646	-1.31814	1.60227e-17	7.98846e-13
PPTG_16401		63.8425	155.65	131.701	1.24227	1.07654	5.9479e-07	1.95383e-05
PPTG_24283		88.7097	34.9752	36.8428	-1.37727	-1.23706	9.34449e-09	3.12762e-07
PPTG_11777		99.4876	40.4503	39.7558	-1.33665	-1.29104	3.26368e-13	2.21119e-12
PPTG_10766		108.321	43.3393	37.3106	-1.37249	-1.50239	4.38772e-10	6.54149e-12
PPTG_09412		214.644	36.9357	27.7178	-2.57432	-2.91571	1.06678e-10	1.80037e-13
PPTG_22166		97.9605	225.752	236.122	1.15598	1.30135	2.58289e-14	6.46467e-18
PPTG_18080		93.9781	31.3204	29.1036	-1.62814	-1.65687	4.57819e-06	3.11317e-06
PPTG_12169		103.134	20.7666	22.3611	-2.34803	-2.17288	1.90104e-24	4.49572e-21
PPTG_14380		150.751	56.9486	59.7091	-1.45319	-1.30284	2.22777e-10	1.62838e-08
PPTG_16625		70.9554	151.207	167.16	1.04859	1.27714	0.0437154	0.0123337
PPTG_10334		265.684	109.552	90.8127	-1.33291	-1.51941	4.24257e-09	1.48777e-11
PPTG_16900		51.6305	149.521	160.96	1.50059	1.67157	1.90564e-06	9.3125e-08
PPTG_04567		422.737	33.8788	38.4736	-3.67904	-3.42558	2.11709e-48	4.13216e-42
PPTG_22906		25.1823	2.68244	3.08297	-3.26149	-2.99603	1.08448e-35	2.9403e-30
PPTG_22973		803.036	210.017	200.936	-1.9848	-1.96755	5.64826e-17	1.07526e-16
PPTG_08708		96.0243	41.3204	40.3103	-1.25993	-1.22202	8.02688e-12	3.53073e-11
PPTG_12171		88.6335	20.3695	22.1888	-2.15685	-1.96514	2.38521e-07	3.0156e-06
PPTG_16190		81.3315	15.1727	16.1922	-2.45679	-2.29715	3.65222e-08	3.03639e-07
PPTG_09844		69.5401	30.3441	32.1198	-1.23285	-1.07953	4.32272e-06	7.16047e-05
PPTG_20306		210.331	437.609	466.627	1.01315	1.18182	1.30129e-08	2.11317e-11
PPTG_12872		101.087	49.548	45.588	-1.08216	-1.11187	0.0215194	0.0185014
PPTG_14253		87.1241	21.7369	18.3899	-2.03986	-2.21322	2.59577e-14	1.11189e-16
PPTG_05391		73.573	26.3634	23.1659	-1.52549	-1.63768	3.19138e-11	8.50912e-13
PPTG_09625		50.8185	113.527	118.666	1.1258	1.24878	0.0241712	0.0118028
PPTG_02902		139.683	62.298	57.501	-1.2089	-1.2498	4.55429e-21	2.01909e-22
PPTG_24384		75.6784	29.4955	27.6174	-1.40148	-1.4274	0.000632207	0.000501474
PPTG_08722		86.5081	11.5671	13.1261	-2.92913	-2.68953	3.31554e-14	3.94677e-12
PPTG_00623		30.8814	13.5912	13.1216	-1.22092	-1.20578	4.32282e-07	6.26093e-07
PPTG_01934		275.595	134.394	99.111	-1.08907	-1.44432	0.000573553	2.88329e-06
PPTG_05406		99.2528	10.6205	10.3595	-3.26428	-3.2285	1.57958e-20	4.33211e-20
PPTG_02782		84.4954	18.7363	23.6609	-2.21278	-1.79467	4.45549e-06	0.000267194
PPTG_03327		95.059	245.711	253.739	1.31734	1.45378	0.0158983	0.007428
PPTG_04194		95.8484	35.5875	35.1053	-1.46433	-1.4211	9.44998e-08	2.42899e-07
PPTG_20059		72.957	20.3568	20.7779	-1.88209	-1.78064	5.22132e-72	1.743e-64
PPTG_04341		120.755	50.8128	54.2234	-1.2859	-1.12803	1.60862e-07	5.44999e-06
PPTG_07665		99.4643	4.29278	4.55919	-4.58725	-4.41066	3.16606e-84	3.2759e-78
PPTG_15600		20.59	7.00567	9.73038	-1.58859	-1.05035	9.76881e-08	0.000682806
PPTG_19446		176.51	45.1609	56.6653	-2.00376	-1.60789	2.55116e-18	3.85109e-12
PPTG_12775		137.908	39.9724	39.4901	-1.82333	-1.77308	0.0149077	0.0190244
PPTG_09026		135.147	303.534	455.1	1.13606	1.78693	0.00362167	1.82489e-06
PPTG_14733		37.8143	15.919	16.8051	-1.29017	-1.13867	5.95407e-20	9.16644e-16
PPTG_09229		39.5339	92.174	144.757	1.19208	1.90569	0.00361462	1.18111e-06
PPTG_03842		52.4675	112.151	104.164	1.05307	1.01443	0.000323203	0.000570552
PPTG_17871		97.7203	248.965	274.846	1.3137	1.5234	4.96373e-08	1.70901e-10
PPTG_05053		34.8361	11.144	11.1331	-1.68403	-1.614	5.75682e-34	3.38484e-31
PPTG_17607		38.9285	13.9517	14.8169	-1.5236	-1.36117	1.02089e-15	9.75982e-13
PPTG_05032		34.308	13.8218	16.2412	-1.34736	-1.05152	8.38325e-06	0.000698014
PPTG_12294		74.2608	22.7034	24.2631	-1.74553	-1.58314	6.5278e-22	3.30907e-18
PPTG_05724		193.552	8.55546	4.0489	-4.5479	-5.54692	6.4089e-126	6.97086e-167
PPTG_12711		87.3344	35.1735	33.4157	-1.36081	-1.35453	3.12324e-14	4.24262e-14
PPTG_13079		65.776	27.3732	27.2235	-1.30522	-1.23627	5.05404e-08	2.80315e-07
PPTG_05407		93.9821	14.204	13.5212	-2.77163	-2.76278	1.62396e-24	2.29237e-24
PPTG_08105		62.4532	163.085	165.697	1.33701	1.44129	2.65959e-16	8.37341e-19
PPTG_19264		74.3541	4.34358	4.47899	-4.13382	-4.01956	3.34146e-41	6.1793e-39
PPTG_02187		62.8068	26.9438	26.5967	-1.2626	-1.20755	1.93593e-16	4.1119e-15
PPTG_17687		128.566	50.3539	45.8207	-1.40689	-1.45507	4.63027e-11	8.9409e-12
PPTG_16449		78.3455	225.749	233.907	1.4884	1.60985	4.92118e-13	4.2139e-15
PPTG_09115		62.7796	2.22544	1.87377	-4.85987	-5.03627	3.26494e-14	3.58818e-15
PPTG_18350		226.126	69.6474	67.2903	-1.74565	-1.71526	4.33161e-13	1.16754e-12
PPTG_16236		78.9661	12.6192	14.471	-2.68347	-2.41449	2.29783e-22	2.56243e-18
PPTG_06143		108.787	46.0811	46.0023	-1.28919	-1.21116	2.32367e-14	8.84273e-13
PPTG_04138		104.889	405.705	421.026	1.90417	2.04019	3.05491e-22	1.9572e-25
PPTG_02179		81.4742	688.015	1312.28	3.05971	4.04433	0.00100203	8.26206e-06
PPTG_00629		205.845	38.544	35.5737	-2.45803	-2.49422	5.50138e-22	1.35236e-22
PPTG_11354		151.79	70.7234	68.7957	-1.15014	-1.10949	6.4699e-22	1.89025e-20
PPTG_19189		47.9168	117.312	127.647	1.25244	1.44723	4.85014e-10	4.07638e-13
PPTG_11417		120.984	57.0483	58.8688	-1.13256	-1.00522	6.36356e-06	7.55146e-05
PPTG_03518		11.4581	29.1565	29.081	1.30021	1.37515	5.45653e-18	5.16199e-20
PPTG_05689		26.6668	6.92679	6.9575	-1.98472	-1.9068	2.53002e-26	2.22825e-24
PPTG_04751		12.8022	5.94629	6.15372	-1.14804	-1.02449	2.23303e-07	4.68967e-06
PPTG_17319		61.6028	130.018	121.621	1.0357	1.01235	5.00896e-07	9.59545e-07
PPTG_17113		30.4854	13.9475	12.9931	-1.16897	-1.20059	1.9355e-11	5.07143e-12
PPTG_20368		198.022	7.2901	5.35989	-4.81126	-5.17187	4.32838e-76	2.14696e-85
PPTG_14990		40.1285	19.5129	18.9434	-1.0828	-1.0522	5.58673e-13	2.67664e-12
PPTG_00422		92.3904	201.715	210.26	1.08508	1.21909	1.31278e-10	3.6502e-13
PPTG_14511		41.1276	131.242	137.925	1.63542	1.77766	5.09416e-12	4.78016e-14
PPTG_16264		19.4201	4.60551	5.05937	-2.12071	-1.90457	2.33355e-06	2.71596e-05
PPTG_02263		12.4398	31.8666	29.1624	1.29979	1.26233	6.83331e-10	2.23212e-09
PPTG_24068		36.2916	7.23489	8.21717	-2.37057	-2.10994	8.46879e-21	1.06711e-16
PPTG_18586		60.3551	13.8309	18.585	-2.16045	-1.66694	2.38089e-21	4.03709e-13
PPTG_13373		55.0099	137.9	136.79	1.28352	1.34646	9.99425e-15	3.92162e-16
PPTG_09114		51.114	2.35684	2.23393	-4.47007	-4.48548	1.73481e-19	1.34221e-19
PPTG_08403		92.9105	34.1632	28.1248	-1.49728	-1.69646	0.00145199	0.000267542
PPTG_01832		49.2494	21.9795	20.6432	-1.21465	-1.22131	1.41282e-15	9.74621e-16
PPTG_11488		125.262	787.6	559.688	2.61151	2.1909	4.36845e-16	1.38227e-11
PPTG_02558		73.6852	30.2889	30.3321	-1.31744	-1.25212	6.28763e-09	3.8634e-08
PPTG_17617		87.7456	201.186	197.833	1.15447	1.20411	5.71606e-16	2.6463e-17
PPTG_10113		40.1982	149.717	158.38	1.85696	2.01135	1.26841e-16	2.37306e-19
PPTG_13135		56.0775	12.9567	15.582	-2.14391	-1.8175	7.91514e-11	4.89562e-08
PPTG_04545		46.7376	13.5278	15.0399	-1.82757	-1.6031	4.18514e-25	1.43271e-19
PPTG_02686		139.821	0.101025	0	-10.5388	-13.9238	8.81564e-63	1.6454e-29
PPTG_22598		61.9264	2.38711	3.11471	-4.74271	-4.27961	1.2741e-169	3.62389e-146
PPTG_04052		33.4137	78.0542	81.5894	1.18554	1.319	3.91759e-09	4.20662e-11
PPTG_18378		79.3591	37.3875	37.3097	-1.12976	-1.05797	8.10395e-12	1.75334e-10
PPTG_24566		157.393	331.944	365.363	1.0384	1.2464	0.00188736	0.00014908
PPTG_20651		476.738	1683.53	1493.25	1.77188	1.67811	2.17156e-27	1.22961e-24
PPTG_11790		197.042	47.0681	36.9331	-2.11755	-2.38599	7.76413e-22	2.33059e-27
PPTG_09835		74.3425	38.0617	31.9552	-1.01244	-1.18724	0.00205239	0.000248186
PPTG_01933		49.3842	111.12	121.86	1.12957	1.33599	1.83924e-12	4.27863e-17
PPTG_12385		40.1241	12.1819	15.8043	-1.76711	-1.3053	7.6133e-07	0.00038171
PPTG_06141		48.1229	18.491	14.8389	-1.42741	-1.66586	2.77918e-13	1.06383e-17
PPTG_17672		63.956	24.8201	27.8938	-1.41155	-1.15641	0.00383513	0.0211609
PPTG_06389		40.6742	4.98018	3.01566	-3.05406	-3.71298	3.66472e-13	6.79059e-19
PPTG_01149		124.328	3.07139	3.52249	-5.37119	-5.09953	3.72772e-34	5.01329e-31
PPTG_15506		62.5298	26.8774	17.7562	-1.27918	-1.78897	6.94331e-07	1.58543e-12
PPTG_16775		72.647	211.878	205.986	1.50046	1.53681	2.78675e-13	6.89689e-14
PPTG_08162		52.9103	18.1608	18.5154	-1.58686	-1.48272	3.5143e-10	5.27739e-09
PPTG_13048		33.8849	73.6795	77.5555	1.07847	1.22704	5.17153e-14	6.85494e-18
PPTG_15671		64.7246	211.861	223.4	1.66713	1.82152	5.76215e-19	1.83746e-22
PPTG_08569		31.883	7.34511	10.4456	-2.15807	-1.57403	3.9756e-07	0.000324461
PPTG_05781		46.107	8.23815	10.2458	-2.5259	-2.13667	6.28038e-35	2.50174e-25
PPTG_05384		35.0954	5.57911	6.17597	-2.68972	-2.47802	1.71206e-33	1.41721e-28
PPTG_11900		40.3033	6.4931	6.08659	-2.66938	-2.69226	1.40858e-24	5.74376e-25
PPTG_08096		68.3548	19.8253	22.0722	-1.83281	-1.59785	6.04576e-11	1.52853e-08
PPTG_05222		106.472	52.7318	51.6627	-1.05637	-1.01246	2.14843e-10	1.27761e-09
PPTG_08684		55.1718	9.5026	7.93612	-2.58326	-2.77032	9.95612e-05	2.7487e-05
PPTG_08724		126.196	4.53409	4.1003	-4.84141	-4.91059	3.7046e-108	2.50281e-109
PPTG_09989		64.1653	23.699	24.6242	-1.4779	-1.35104	5.47878e-12	3.56152e-10
PPTG_22487		655.282	1347.28	1978.62	1.0074	1.62767	0.0335459	0.000304567
PPTG_18455		62.3561	148.526	123.635	1.21454	1.0179	0.000459637	0.00409245
PPTG_08511		43.9962	11.9008	11.7543	-1.92943	-1.87401	4.46021e-18	4.18756e-17
PPTG_07468		53.6395	22.1119	22.6394	-1.3206	-1.21164	1.36086e-22	3.35233e-19
PPTG_03117		54.5456	3.93997	4.92343	-3.81141	-3.44096	5.62294e-22	3.45016e-18
PPTG_12253		53.5133	23.3117	20.7827	-1.23964	-1.3312	1.15979e-12	1.96582e-14
PPTG_08955		106.884	1.9734	1.58032	-5.80727	-6.04571	5.42918e-68	9.56727e-72
PPTG_07169		102.526	21.0216	17.3346	-2.33507	-2.53335	3.32381e-17	5.19383e-20
PPTG_01554		19.7436	7.46157	9.59733	-1.45372	-1.00164	0.000355098	0.0185288
PPTG_00264		90.6267	17.7773	23.2952	-2.39238	-1.92528	2.65615e-19	7.04532e-13
PPTG_13315		32.4017	15.9929	14.6218	-1.06157	-1.11929	5.17243e-10	5.12103e-11
PPTG_06610		44.4938	177.959	151.357	1.94323	1.80128	2.94963e-09	4.56009e-08
PPTG_00290		26.7891	12.3081	12.7491	-1.16147	-1.04018	1.86784e-05	0.000152652
PPTG_14508		49.3441	116.855	129.292	1.20009	1.43111	0.0362941	0.0111972
PPTG_21326		31.9873	10.3539	10.6307	-1.66027	-1.5604	6.73086e-10	7.53105e-09
PPTG_01698		104.85	53.8	46.7676	-1.01637	-1.13102	2.22108e-05	2.02965e-06
PPTG_05429		39.5505	13.9014	13.9436	-1.55265	-1.47182	1.16323e-39	1.12882e-35
PPTG_17114		79.2027	5.21276	5.22522	-3.97449	-3.88798	7.97691e-46	7.54031e-44
PPTG_12050		43.9308	19.5214	19.4855	-1.21481	-1.13574	0.0118261	0.0202397
PPTG_19967		701.639	253.21	291.428	-1.49547	-1.24184	3.81737e-05	0.000800588
PPTG_00015		68.7088	20.0311	13.1141	-1.83049	-2.36077	2.75111e-06	8.24866e-10
PPTG_09598		30.5487	15.3958	14.3794	-1.03222	-1.05682	9.99522e-13	2.89888e-13
PPTG_11814		32.263	5.63405	4.71016	-2.56671	-2.74427	1.7503e-60	3.26573e-68
PPTG_02695		55.1173	164.315	178.589	1.5361	1.72887	1.84107e-15	2.26149e-19
PPTG_20750		64.7277	456.619	445.112	2.79764	2.81209	0.00192812	0.00187173
PPTG_16603		41.0145	16.2952	18.6796	-1.36849	-1.10264	9.13529e-08	2.32624e-05
PPTG_03758		23.6919	6.53561	6.49649	-1.88588	-1.83732	1.45088e-10	4.43458e-10
PPTG_22295		48.477	17.5908	13.1211	-1.50941	-1.85295	0.000123527	1.68418e-06
PPTG_06914		49.9227	9.5024	9.9586	-2.43748	-2.29469	1.64954e-28	2.19417e-25
PPTG_10361		44.8697	2.71441	2.05807	-4.08698	-4.41459	7.52817e-19	1.14955e-21
PPTG_19252		41.5954	12.5624	12.2652	-1.75954	-1.72324	1.29532e-06	2.29908e-06
PPTG_05765		83.5821	18.1877	29.9961	-2.23838	-1.44143	5.14586e-07	0.00192568
PPTG_17926		54.1432	116.106	110.257	1.05546	1.05985	3.63896e-15	2.71334e-15
PPTG_01579		41.8442	21.4324	18.4371	-1.001	-1.14989	1.06138e-05	3.36394e-07
PPTG_20271		33.6611	15.4289	15.1476	-1.1719	-1.12022	2.4931e-08	1.12023e-07
PPTG_07753		36.99	8.10074	9.25367	-2.22836	-1.96248	2.52919e-20	4.97019e-16
PPTG_15805		50.6938	7.41358	7.82813	-2.81945	-2.64474	0.00680001	0.0120547
PPTG_05960		22.125	158.252	191.993	2.79534	3.16291	0.0423413	0.020453
PPTG_22741		18.3621	5.8544	6.41887	-1.68446	-1.48613	8.85485e-13	3.66419e-10
PPTG_18452		90.4482	344.199	384.29	1.88029	2.11931	2.64999e-06	9.72787e-08
PPTG_21036		49.8026	3.35993	2.44553	-3.93332	-4.32077	2.87152e-27	2.71321e-32
PPTG_13013		26.0705	4.15222	4.63588	-2.68339	-2.46052	3.92703e-20	3.84823e-17
PPTG_13195		34.436	9.28006	11.1259	-1.92846	-1.59786	0.000209089	0.00264908
PPTG_21540		22.4307	67.0119	74.1884	1.53932	1.76035	4.48646e-08	2.75029e-10
PPTG_17152		106.25	243.747	233.584	1.14938	1.16942	4.90531e-14	1.6876e-14
PPTG_16398		41.9376	19.9888	18.5025	-1.11247	-1.14995	2.53311e-17	2.15132e-18
PPTG_03953		194.727	81.1725	81.2586	-1.31291	-1.23005	1.25414e-07	8.42117e-07
PPTG_16884		36.9085	184.353	261.861	2.27901	2.85891	4.21117e-10	2.06411e-15
PPTG_15924		26.0703	9.94342	11.1217	-1.42533	-1.19651	1.48753e-14	1.48953e-10
PPTG_06544		40.0257	19.1136	15.6367	-1.11224	-1.32803	0.000199555	6.71897e-06
PPTG_14746		60.0427	128.254	125.072	1.05542	1.08915	1.55397e-05	8.0448e-06
PPTG_01204		26.5891	13.2101	12.8216	-1.0484	-1.01831	7.62473e-11	2.75483e-10
PPTG_00624		27.7335	4.41323	5.06392	-2.69311	-2.41902	1.02574e-46	4.58774e-38
PPTG_04402		49.2062	16.6811	16.9917	-1.59775	-1.4991	6.66909e-20	1.20108e-17
PPTG_03494		100.436	13.6415	11.3455	-2.93785	-3.11518	1.98508e-22	5.20889e-25
PPTG_12085		17.2775	0.00987786	0	-10.9087	-13.2941	2.2966e-35	5.50743e-27
PPTG_02397		46.2664	7.36049	6.58637	-2.70287	-2.78246	1.30252e-20	1.00673e-21
PPTG_12409		45.5607	11.8804	8.95042	-1.98015	-2.32052	2.52445e-11	3.62954e-15
PPTG_07824		77.4822	26.709	24.415	-1.57669	-1.63518	9.90313e-23	2.50364e-24
PPTG_13412		79.1926	183.807	163.442	1.16866	1.07709	1.5196e-08	2.21419e-07
PPTG_09616		17.7857	39.232	45.0826	1.10621	1.3739	4.86274e-07	2.2549e-10
PPTG_13543		40.3824	90.2352	84.4619	1.11399	1.09662	1.35899e-17	4.53177e-17
PPTG_07693		42.2193	4.15595	3.73425	-3.38654	-3.45667	1.34022e-05	8.89154e-06
PPTG_11022		38.8705	16.6818	16.3414	-1.26355	-1.21691	3.15677e-12	2.08528e-11
PPTG_16840		56.3172	329.294	401.783	2.50506	2.87156	4.84828e-09	1.30088e-11
PPTG_07471		33.6642	15.0375	14.1404	-1.19671	-1.22064	1.52763e-11	5.79768e-12
PPTG_03448		38.6678	4.03925	6.34051	-3.28991	-2.56357	6.84444e-06	0.000618892
PPTG_04371		43.3709	148.351	133.219	1.72691	1.65333	3.46446e-23	2.5022e-21
PPTG_02543		17.8367	1.5328	2.87182	-3.5811	-2.60012	2.61e-12	5.89242e-07
PPTG_14991		52.5979	16.9884	15.9693	-1.68094	-1.68744	6.00682e-30	4.52501e-30
PPTG_14118		45.2577	132.139	140.922	1.50061	1.6716	8.49796e-14	6.40351e-17
PPTG_08778		202.696	77.4166	69.0914	-1.44003	-1.52429	2.15254e-06	4.94432e-07
PPTG_16510		43.6144	142.299	160.678	1.66061	1.91555	5.38903e-16	5.21702e-21
PPTG_24575		23.8315	4.19031	4.31696	-2.54379	-2.432	1.95519e-17	4.96602e-16
PPTG_14510		135.761	45.1568	40.5622	-1.63573	-1.71334	5.13197e-18	1.33357e-19
PPTG_12308		46.0293	4.41113	6.55931	-3.42595	-2.76601	8.44406e-11	2.18246e-07
PPTG_00900		25.1356	11.2494	9.74253	-1.20344	-1.33845	1.05477e-07	2.80942e-09
PPTG_15546		39.7978	14.232	15.9662	-1.52332	-1.28682	2.26671e-34	6.47716e-25
PPTG_00967		25.6951	5.03453	8.5996	-2.38917	-1.5488	1.12182e-07	0.000929187
PPTG_14111		37.8587	9.46956	11.1787	-2.04819	-1.72833	1.31381e-10	8.02587e-08
PPTG_04851		11.3036	23.7646	23.183	1.02781	1.06826	9.20396e-15	6.85786e-16
PPTG_16201		28.9996	6.37982	5.87002	-2.22151	-2.2722	1.37069e-08	6.26252e-09
PPTG_16503		43.2319	90.5601	92.1124	1.0253	1.12284	1.1379e-07	5.18535e-09
PPTG_00991		30.203	96.2937	82.0238	1.62765	1.47376	1.26215e-09	4.85563e-08
PPTG_14660		11.2306	130.874	186.709	3.50294	4.10398	0.0158689	0.00420924
PPTG_17221		46.3113	287.12	291.037	2.57913	2.68519	1.20214e-57	2.2351e-62
PPTG_08344		57.7171	26.2913	24.3417	-1.17909	-1.21636	7.5895e-21	5.04836e-22
PPTG_16168		31.0611	5.06307	5.05926	-2.66645	-2.58722	1.31011e-84	7.1958e-80
PPTG_14210		68.095	179.909	149.616	1.34941	1.16561	8.77285e-17	1.01113e-12
PPTG_00389		55.185	1.31127	2.58729	-5.42018	-4.37607	2.643e-11	9.09067e-08
PPTG_08143		168.845	85.319	74.0032	-1.03279	-1.1584	2.77634e-18	1.52975e-22
PPTG_07925		25.9442	70.8368	67.0936	1.41193	1.39977	6.33578e-08	8.67656e-08
PPTG_22549		88.7948	184.307	204.831	1.01884	1.2382	0.000735436	2.99166e-05
PPTG_08585		44.6908	9.78867	10.4878	-2.23754	-2.05509	2.716e-14	3.20256e-12
PPTG_00978		34.2342	13.6297	15.3544	-1.36686	-1.12396	9.05901e-10	6.53953e-07
PPTG_09583		11.4467	30.9021	34.7517	1.39173	1.63531	7.98019e-10	3.14023e-13
PPTG_13017		37.3587	2.20207	1.51318	-4.10932	-4.59448	2.60824e-23	2.84503e-28
PPTG_16388		7.11658	0.350009	0.568506	-4.38411	-3.62282	1.36138e-20	8.02659e-15
PPTG_19415		30.0139	3.12425	3.59154	-3.30206	-3.02838	3.14092e-30	9.90611e-26
PPTG_16204		22.3068	3.45747	3.8386	-2.72352	-2.5049	6.3634e-22	9.20057e-19
PPTG_03887		51.4718	23.2711	25.0415	-1.18505	-1.0083	9.52838e-09	1.37478e-06
PPTG_02441		25.5207	7.11702	7.29903	-1.8879	-1.76726	5.02413e-10	6.67669e-09
PPTG_08721		43.1563	10.225	9.4796	-2.11117	-2.15678	5.07633e-15	1.27911e-15
PPTG_09661		41.1204	2.68484	2.98064	-3.9722	-3.74441	8.20773e-22	1.38225e-19
PPTG_18911		37.2597	95.3348	95.7537	1.31355	1.39433	3.56996e-06	7.93753e-07
PPTG_04879		49.8757	109.857	104.666	1.09235	1.10155	1.06817e-15	5.89557e-16
PPTG_08158		16.8404	8.05347	7.70769	-1.10044	-1.09843	2.23303e-07	2.44532e-07
PPTG_12135		53.1397	130.946	120.116	1.25398	1.20883	1.81199e-09	7.40437e-09
PPTG_13152		29.5175	107.373	108.975	1.80526	1.92658	0.00605554	0.00327439
PPTG_14653		14.9321	41.4213	37.0156	1.4127	1.34317	7.4942e-08	3.58584e-07
PPTG_18713		14.9585	2.48106	2.43066	-2.63838	-2.59151	7.53951e-48	4.59191e-46
PPTG_00178		14.0462	3.97061	3.66394	-1.86433	-1.90632	2.92016e-28	2.29202e-29
PPTG_06886		42.3969	19.106	13.9243	-1.19974	-1.58203	0.023005	0.00209708
PPTG_08856		32.5105	75.1646	80.0108	1.15924	1.34	0.0158138	0.004784
PPTG_20939		241.133	1235.44	1283.93	2.29771	2.44511	8.19112e-19	3.52195e-21
PPTG_04476		49.3493	106.656	103.969	1.0684	1.10657	1.37848e-09	3.17076e-10
PPTG_07580		25.0134	4.48985	5.09801	-2.5162	-2.26078	1.11308e-30	4.23803e-25
PPTG_00306		16.0184	5.82582	5.72968	-1.50843	-1.44911	3.33677e-13	2.95958e-12
PPTG_13501		20.615	61.2565	78.215	1.52557	1.9572	2.17762e-06	6.36169e-10
PPTG_00094		37.7567	9.564	7.77291	-2.03046	-2.24528	1.17881e-18	2.05507e-22
PPTG_15928		21.617	3.72559	3.90277	-2.56603	-2.44341	8.68976e-14	1.34818e-12
PPTG_08650		14.4558	29.8399	31.9983	1.00829	1.17835	1.24804e-07	4.28212e-10
PPTG_14034		20.649	45.204	53.172	1.08792	1.39847	1.62507e-06	3.56477e-10
PPTG_16031		12.6571	28.9651	32.4524	1.15502	1.39041	2.23432e-08	9.43247e-12
PPTG_06959		27.1446	1.30857	1.77559	-4.40636	-3.8996	6.14464e-35	4.38108e-28
PPTG_04280		23.404	2.25375	2.27939	-3.40028	-3.33327	9.15353e-22	5.81941e-21
PPTG_01887		49.6744	3.65706	3.28349	-3.81779	-3.88847	9.05779e-30	1.19044e-30
PPTG_11222		10.8352	32.7402	34.2312	1.53954	1.69708	8.19868e-08	2.70534e-09
PPTG_02997		10.5978	72.4683	92.5917	2.72207	3.17533	0.0106783	0.00255165
PPTG_05586		5.04627	12.362	13.8676	1.24502	1.49208	8.27521e-17	8.31181e-24
PPTG_12741		27.84	12.267	13.2674	-1.21315	-1.0351	0.000128569	0.0013198
PPTG_03490		58.3554	7.18505	6.22672	-3.0591	-3.19692	7.13311e-31	2.32776e-33
PPTG_01436		9.60561	2.28577	2.51242	-2.11936	-1.90087	5.04939e-24	1.33357e-19
PPTG_08393		15.3877	3.15814	3.07143	-2.33485	-2.28925	1.48192e-14	5.05435e-14
PPTG_13049		40.7972	16.0704	13.6101	-1.39042	-1.55567	1.57828e-08	2.05768e-10
PPTG_10588		14.8494	4.89901	4.78604	-1.63955	-1.60336	6.85962e-08	1.42806e-07
PPTG_19275		14.0937	0	0.0031958	-12.995	-11.9773	3.87339e-25	1.76433e-21
PPTG_17766		30.4013	84.9945	72.0186	1.43545	1.27615	6.75353e-17	1.64288e-13
PPTG_04943		16.4386	42.9707	42.6394	1.34217	1.40767	1.15259e-51	7.96548e-57
PPTG_06825		22.9935	61.4747	65.6296	1.38485	1.54235	1.18874e-07	2.86895e-09
PPTG_04012		25.8043	86.8535	81.9998	1.70757	1.69848	6.18939e-77	5.89091e-76
PPTG_10069		9.20331	20.6184	21.4695	1.12539	1.25114	7.29293e-08	1.67396e-09
PPTG_15173		23.0524	8.00708	8.4743	-1.5642	-1.41848	4.59607e-05	0.000257096
PPTG_19600		138.248	563.298	591.575	1.97085	2.13924	0.0436514	0.0279865
PPTG_12941		26.2944	5.85376	6.23081	-2.21019	-2.04791	7.89934e-16	9.24025e-14
PPTG_07600		48.9962	14.0106	15.083	-1.85566	-1.66832	1.5921e-41	5.40491e-34
PPTG_05306		27.8819	11.3679	10.6205	-1.34263	-1.36111	4.58022e-12	2.38137e-12
PPTG_18968		9.59854	25.4801	30.6269	1.37309	1.70772	3.54693e-07	1.29006e-10
PPTG_18384		20.8802	3.88501	4.38564	-2.45187	-2.22045	1.56994e-08	3.63752e-07
PPTG_14718		23.2362	48.0628	51.9794	1.00965	1.19227	7.52654e-05	2.16577e-06
PPTG_09418		7.92482	1.89856	2.47687	-2.08922	-1.65033	7.83359e-12	9.04026e-08
PPTG_13018		42.9054	0.375055	0.199147	-6.87011	-7.72351	1.73482e-47	8.00347e-49
PPTG_18625		37.1255	99.61	75.9159	1.37407	1.06362	1.55393e-21	3.35361e-13
PPTG_09126		23.4973	52.1211	58.9315	1.11118	1.35865	4.00741e-05	3.40654e-07
PPTG_13950		20.4249	201.458	303.431	3.27525	3.94464	0.0335459	0.00921589
PPTG_11220		25.3926	56.5107	53.9681	1.09482	1.12256	6.14339e-07	3.12828e-07
PPTG_20279		41.2132	105.008	93.9129	1.3061	1.22152	1.87722e-10	3.01079e-09
PPTG_09251		21.2863	51.6312	50.7803	1.22096	1.28786	5.78785e-09	7.15522e-10
PPTG_11788		18.5941	3.18652	3.74048	-2.59436	-2.28169	3.46376e-43	4.44129e-34
PPTG_17809		12.9148	6.33466	6.1511	-1.06871	-1.03917	3.74413e-15	2.28587e-14
PPTG_11265		13.9024	62.8793	68.341	2.1243	2.33886	0.00430272	0.00154195
PPTG_04797		18.0385	136.507	135.293	2.87409	2.93799	2.99281e-10	1.11456e-10
PPTG_20645		19.7818	1.19768	0.51579	-4.07388	-5.22484	3.06635e-07	5.14712e-11
PPTG_00984		19.8118	42.2307	44.8416	1.04589	1.21541	0.00429679	0.000767308
PPTG_13034		20.7136	9.9077	8.85829	-1.1099	-1.191	5.24552e-07	6.79742e-08
PPTG_07810		27.1276	10.1687	9.88145	-1.46038	-1.42896	4.92699e-08	1.03182e-07
PPTG_07020		41.7188	129.994	148.119	1.59395	1.8681	0.00426372	0.000678285
PPTG_05362		22.3946	61.4653	56.3126	1.40996	1.36276	3.18869e-18	4.52596e-17
PPTG_19262		21.6123	4.05576	4.2411	-2.46097	-2.31646	8.68462e-21	1.42319e-18
PPTG_14778		35.6364	90.3544	120.215	1.29479	1.78793	8.99125e-05	2.9046e-08
PPTG_05962		32.6689	5.56934	4.89304	-2.59564	-2.70328	2.29093e-09	4.62562e-10
PPTG_14759		14.2173	34.3706	38.9019	1.23029	1.48407	7.6686e-13	2.59883e-18
PPTG_14658		29.9634	5.48785	4.97975	-2.50172	-2.5554	1.5153e-16	3.57861e-17
PPTG_04267		24.2667	55.1772	52.4483	1.14463	1.14252	4.15733e-09	4.52715e-09
PPTG_19366		24.3812	146.497	242.672	2.56488	3.34696	0.00160549	2.44243e-05
PPTG_03011		17.1087	61.8631	66.6	1.8029	1.99738	0.000157687	2.41544e-05
PPTG_03950		17.1093	8.22978	7.68142	-1.10001	-1.11941	0.000193522	0.000149972
PPTG_05370		33.6785	157.642	162.207	2.17847	2.30273	1.0476e-18	8.52751e-21
PPTG_08420		63.2558	2.51234	2.52522	-4.69477	-4.61197	9.96797e-23	5.21009e-22
PPTG_11804		26.3701	12.3364	12.6681	-1.13825	-1.02206	1.00502e-08	3.27922e-07
PPTG_05903		30.4223	75.6284	84.181	1.26172	1.50499	8.51724e-05	1.99162e-06
PPTG_14626		12.9434	4.53221	4.54775	-1.54915	-1.47138	0.000478956	0.00099065
PPTG_09148		37.479	85.4965	92.986	1.13494	1.35175	0.0348194	0.0106603
PPTG_11261		28.5125	104.234	90.9372	1.82303	1.70406	4.70791e-22	2.2244e-19
PPTG_03238		66.9023	166.86	143.99	1.262	1.14014	2.3048e-09	8.63031e-08
PPTG_19503		44.2399	18.0973	16.9089	-1.32278	-1.35582	9.55128e-10	3.55386e-10
PPTG_02887		33.7525	1.04197	1.95663	-5.04815	-4.07218	3.87825e-07	5.34571e-05
PPTG_16820		30.0895	4.56776	4.5855	-2.76369	-2.67909	2.98054e-30	1.73945e-28
PPTG_00512		30.6157	5.6024	7.45553	-2.50139	-2.0052	1.32247e-21	2.02687e-14
PPTG_04265		18.8142	45.6956	49.1345	1.23551	1.41218	5.03786e-08	3.26215e-10
PPTG_17569		30.0783	103.606	110.938	1.741	1.91593	1.24496e-13	2.45679e-16
PPTG_00702		29.6724	114.344	109.324	1.90547	1.91383	8.76029e-25	5.35035e-25
PPTG_07882		143.199	334.33	308.861	1.16986	1.14328	7.97731e-10	2.03631e-09
PPTG_04301		42.2661	16.6172	16.4955	-1.39029	-1.32255	1.78511e-16	5.30203e-15
PPTG_16091		53.1622	127.624	122.158	1.21281	1.23951	0.00131314	0.00102592
PPTG_22683		42.6161	133.957	122.098	1.60396	1.54945	1.30322e-12	7.99268e-12
PPTG_03012		19.4555	82.5242	88.3425	2.02631	2.22073	3.68869e-09	7.89607e-11
PPTG_09786		32.8408	1.74381	2.53136	-4.27209	-3.66283	1.81349e-51	2.28743e-40
PPTG_08770		6.11102	2.54188	2.85218	-1.3124	-1.065	3.4862e-07	4.78236e-05
PPTG_04464		25.9363	12.8183	12.0978	-1.054	-1.07204	0.00052838	0.000425529
PPTG_22456		43.1583	286.504	315.085	2.67622	2.90994	0.00294054	0.00112843
PPTG_06835		28.8712	4.68476	4.41426	-2.64787	-2.68327	1.04949e-08	6.71003e-09
PPTG_00625		29.1811	12.8082	12.5083	-1.23238	-1.19176	4.84935e-10	1.90233e-09
PPTG_12022		17.8687	73.2687	81.5115	2.00087	2.22161	5.81683e-10	4.34214e-12
PPTG_16897		20.8964	49.7994	54.5283	1.21147	1.41711	1.64948e-10	4.47641e-14
PPTG_01940		14.812	6.66561	6.09559	-1.20225	-1.24663	0.00015322	8.40914e-05
PPTG_11041		18.2646	0.993889	1.02966	-4.24437	-4.11041	2.73607e-47	1.37591e-44
PPTG_15692		10.7749	32.0798	37.2854	1.53579	1.82321	2.28288e-13	1.71507e-18
PPTG_16570		13.65	29.088	31.2142	1.04877	1.22806	2.27091e-10	6.4809e-14
PPTG_13914		71.4993	166.854	150.973	1.17669	1.11105	1.46538e-09	1.3067e-08
PPTG_04264		28.5492	74.3878	74.3452	1.34282	1.41043	2.34663e-06	6.65001e-07
PPTG_16902		9.62483	124.001	130.062	3.65501	3.79048	2.25642e-25	2.99276e-27
PPTG_16545		14.1565	34.5791	37.8201	1.24777	1.44983	2.52445e-11	5.19458e-15
PPTG_17401		20.4945	59.2502	69.3497	1.49364	1.78357	1.31337e-06	5.03157e-09
PPTG_09307		12.7408	5.02422	4.3276	-1.38685	-1.52443	8.20643e-21	1.09913e-24
PPTG_14783		14.8567	4.10864	4.69092	-1.89355	-1.62522	2.24174e-09	3.61472e-07
PPTG_09996		36.7915	114.225	115.124	1.59151	1.67599	3.38276e-08	5.50061e-09
PPTG_13014		32.171	1.25777	0.9352	-4.69846	-5.07769	7.83935e-28	4.65025e-31
PPTG_07707		47.8885	23.4461	20.0426	-1.08353	-1.22369	1.2288e-08	1.05987e-10
PPTG_16901		11.4274	92.6874	114.021	2.98284	3.35415	1.44705e-19	1.56108e-24
PPTG_12142		21.1864	8.89349	7.61629	-1.29946	-1.44379	0.000161156	2.41751e-05
PPTG_02472		10.4978	32.571	35.9383	1.59642	1.80815	1.17068e-13	2.76054e-17
PPTG_17623		23.3036	53.8734	47.6327	1.15594	1.06738	1.38903e-05	7.03975e-05
PPTG_11454		20.7294	9.40222	9.80584	-1.19683	-1.03999	0.000318942	0.00209441
PPTG_00043		21.86	50.5175	50.7455	1.15608	1.25171	0.0298633	0.0182927
PPTG_01494		17.8187	8.6775	7.34248	-1.08889	-1.24621	1.52006e-13	3.03033e-17
PPTG_18664		42.6642	8.85557	8.90472	-2.29965	-2.23329	4.32259e-11	1.58914e-10
PPTG_04635		15.6295	38.736	37.8782	1.26964	1.30554	3.05649e-06	1.5822e-06
PPTG_19142		34.429	9.39966	10.8537	-1.9233	-1.62428	5.7911e-06	0.000163918
PPTG_17182		29.7777	1.93955	2.02616	-3.97502	-3.8377	1.96598e-23	5.21009e-22
PPTG_03051		18.7082	47.0825	41.7147	1.27615	1.18968	2.60813e-11	6.05903e-10
PPTG_09887		30.6952	2.16788	2.35249	-3.86966	-3.67459	2.06359e-39	6.81729e-36
PPTG_14270		10.3367	2.50484	2.7093	-2.0832	-1.89973	1.65621e-14	2.82282e-12
PPTG_19004		8.85687	23.1082	22.0233	1.33431	1.3505	6.14322e-05	5.08332e-05
PPTG_11714		4.48887	1.91265	2.00637	-1.27389	-1.12944	2.71898e-12	6.98153e-10
PPTG_17938		20.1003	2.06304	1.9432	-3.32647	-3.3371	2.3004e-52	2.98227e-52
PPTG_12449		15.4823	36.9286	37.0297	1.20727	1.29225	0.000245396	7.95047e-05
PPTG_03691		10.7147	27.9889	31.3972	1.34225	1.5823	2.4802e-15	5.22295e-21
PPTG_20480		44.5305	242.922	298.64	2.40021	2.77805	2.7965e-11	7.85516e-15
PPTG_13141		38.746	6.42073	2.45137	-2.66767	-3.93764	0.0152728	0.000212575
PPTG_09425		24.1793	3.49766	3.91714	-2.81914	-2.59475	1.0476e-18	4.62662e-16
PPTG_09215		21.7058	4.81343	4.45309	-2.22127	-2.25229	5.61679e-16	2.20261e-16
PPTG_09602		23.0619	9.36404	8.71013	-1.35471	-1.36963	4.66241e-07	3.57509e-07
PPTG_24377		109.428	31.8874	30.0351	-1.81959	-1.83204	8.17967e-12	5.93899e-12
PPTG_10059		17.3019	2.43183	1.70323	-2.87229	-3.30973	1.41035e-18	7.8181e-24
PPTG_19361		37.0022	87.2619	80.8349	1.19264	1.15629	2.92464e-06	6.3703e-06
PPTG_12298		22.2124	6.43931	7.40691	-1.83531	-1.54292	3.78166e-05	0.000667632
PPTG_12016		22.686	8.67871	8.52306	-1.43164	-1.38036	3.08792e-11	1.61096e-10
PPTG_00847		5.2082	1.16943	1.37445	-2.19935	-1.89075	7.89954e-19	2.75347e-14
PPTG_00491		5.74614	1.37031	1.50294	-2.09743	-1.90555	2.62241e-15	7.42159e-13
PPTG_03496		49.9962	9.98154	9.91182	-2.38854	-2.3016	3.78465e-18	6.15918e-17
PPTG_06685		6.67651	1.70032	1.59945	-2.01146	-2.03441	3.31252e-14	1.81356e-14
PPTG_12154		25.6793	71.0667	74.6367	1.42192	1.57189	4.36031e-26	8.79373e-32
PPTG_02167		18.6385	71.1474	74.4779	1.88488	2.03298	5.29141e-20	3.80754e-23
PPTG_17512		14.0449	36.1614	38.9987	1.32175	1.50596	1.02694e-15	3.60646e-20
PPTG_11989		2.26608	7.01172	7.94333	1.58263	1.85335	0.00049968	3.56545e-05
PPTG_18293		32.3749	3.9444	3.97932	-3.07555	-2.99563	2.41631e-19	2.04778e-18
PPTG_10109		38.589	8.82704	8.57502	-2.17472	-2.13811	1.79873e-36	3.73853e-35
PPTG_07537		48.9383	14.9005	14.3409	-1.76713	-1.73669	7.69708e-09	1.48749e-08
PPTG_03539		23.6689	9.0954	9.96999	-1.42409	-1.21609	1.62338e-07	9.79289e-06
PPTG_02811		19.3584	42.2355	40.7604	1.07907	1.10684	9.90078e-08	4.56009e-08
PPTG_06080		7.40896	16.0619	16.6551	1.07411	1.19886	3.2641e-10	1.59844e-12
PPTG_05894		12.3953	46.0721	53.0965	1.84637	2.1243	1.00036e-05	2.86454e-07
PPTG_18629		16.6631	50.58	58.4648	1.56049	1.84667	3.47071e-14	1.56036e-19
PPTG_03553		46.2107	108.126	91.5736	1.17396	1.01537	4.42315e-10	9.58871e-08
PPTG_07237		47.7803	112.875	96.6301	1.19015	1.04891	4.24355e-21	1.56271e-16
PPTG_09479		13.8448	3.83786	3.43401	-1.8911	-1.98161	3.59212e-24	3.03503e-26
PPTG_09947		17.6768	5.23433	4.50661	-1.8116	-1.93976	1.03357e-21	1.87694e-24
PPTG_14637		17.914	1.54462	2.55129	-3.58481	-2.77696	3.66589e-10	1.60931e-06
PPTG_22225		142.863	361.068	324.232	1.27717	1.21631	6.58543e-08	3.0399e-07
PPTG_09697		25.1899	12.2168	10.6455	-1.09287	-1.2131	1.89955e-11	8.91597e-14
PPTG_12471		17.2167	5.40662	6.91483	-1.71004	-1.2823	1.64696e-06	0.000461755
PPTG_23320		47.0228	132.755	141.013	1.46999	1.61046	0.000653435	0.000168997
PPTG_08156		17.3323	48.9142	52.2088	1.452	1.62422	2.36823e-13	1.6639e-16
PPTG_10067		33.4515	14.1638	13.5142	-1.28534	-1.2779	5.17668e-15	8.10466e-15
PPTG_14723		9.81971	0.620268	0.579469	-4.03494	-4.05098	5.01654e-67	1.78988e-66
PPTG_06142		73.0928	13.2739	20.1372	-2.50805	-1.82083	5.32227e-08	0.000114959
PPTG_08359		11.3966	4.0678	3.64798	-1.52953	-1.61082	1.20649e-19	1.71037e-21
PPTG_02432		19.8907	47.1773	39.4524	1.18782	1.02229	6.03016e-09	7.58999e-07
PPTG_12274		13.0447	32.2235	37.8803	1.26421	1.57059	4.77941e-13	1.08175e-19
PPTG_04927		14.7282	32.601	32.4858	1.09987	1.1743	7.83953e-07	1.20647e-07
PPTG_00145		8.84514	35.7812	45.5452	1.97925	2.40665	3.9285e-05	3.88944e-07
PPTG_03648		16.6505	4.09942	4.66139	-2.07109	-1.80121	2.58427e-17	2.0272e-13
PPTG_13879		26.3369	1.76474	1.57701	-3.92366	-4.0297	2.64255e-36	1.53546e-37
PPTG_00772		20.0016	6.50781	7.30103	-1.65245	-1.42116	6.79612e-10	1.42215e-07
PPTG_19124		23.8566	51.8727	51.0557	1.07081	1.13005	6.12235e-18	7.09967e-20
PPTG_15375		20.5911	62.9017	63.149	1.56212	1.64711	5.72989e-15	1.46806e-16
PPTG_03513		16.4613	6.92533	6.38845	-1.28443	-1.33298	1.83865e-12	2.75405e-13
PPTG_08122		13.4378	38.5463	41.3672	1.47729	1.65383	1.24495e-14	3.93453e-18
PPTG_13656		12.318	4.60524	5.52424	-1.45561	-1.12332	1.11668e-10	8.65187e-07
PPTG_13435		30.9104	65.5403	72.8715	1.02881	1.28049	0.0210406	0.00337822
PPTG_22954		250.945	0	0.11799	-11.8776	-10.8599	7.15394e-21	1.34428e-17
PPTG_07812		21.2336	9.90676	9.46421	-1.14751	-1.13726	5.80905e-05	7.12205e-05
PPTG_01605		11.062	36.8014	31.7356	1.67575	1.55488	1.07785e-20	6.46467e-18
PPTG_17186		14.9945	2.95799	3.12312	-2.37649	-2.23352	5.55879e-27	4.46252e-24
PPTG_23839		33.0275	10.9907	12.4682	-1.62428	-1.37772	1.31314e-09	3.34814e-07
PPTG_00268		15.5024	33.7228	33.5751	1.08022	1.14575	6.82646e-08	9.27396e-09
PPTG_16619		27.1406	6.81746	5.57168	-2.04265	-2.25298	1.28973e-36	5.18057e-43
PPTG_11424		13.9562	4.71	4.70207	-1.60994	-1.53681	6.02014e-13	6.96573e-12
PPTG_12660		15.3607	4.96525	4.29163	-1.69009	-1.8062	3.72812e-12	1.12571e-13
PPTG_08882		16.2087	59.4284	68.1968	1.82713	2.11552	0.000318942	2.41751e-05
PPTG_14791		20.8896	46.1212	42.7465	1.0965	1.0645	1.62053e-10	5.866e-10
PPTG_02228		12.2378	40.5236	47.4107	1.68769	1.98603	4.07117e-07	1.65289e-09
PPTG_04816		10.3757	22.924	25.8559	1.10158	1.35077	7.88365e-11	6.84434e-16
PPTG_10387		31.2699	119.468	128.467	1.8918	2.07363	0.0112138	0.00516425
PPTG_13300		9.17666	3.1897	3.04012	-1.56907	-1.55985	3.3894e-09	4.37229e-09
PPTG_07811		12.9313	30.0504	31.9737	1.17311	1.34108	8.14535e-09	2.94881e-11
PPTG_07219		11.1111	28.6042	30.2703	1.31874	1.47853	4.59386e-15	9.76799e-19
PPTG_12232		4.16339	0.414589	0.423673	-3.38114	-3.26681	7.21701e-47	4.49577e-44
PPTG_10858		10.4845	37.6907	54.6763	1.81409	2.41647	9.49325e-07	2.80929e-11
PPTG_12426		22.0731	104.071	115.869	2.18254	2.42623	1.97076e-12	3.63619e-15
PPTG_15598		13.6652	62.6877	58.3899	2.15802	2.13018	7.06263e-10	1.20716e-09
PPTG_14387		10.4524	26.2997	29.5183	1.29175	1.53086	8.05361e-13	1.11261e-17
PPTG_10401		26.5334	215.65	207.667	2.9854	3.00388	3.83615e-19	2.25345e-19
PPTG_11381		114.999	246.956	238.08	1.05108	1.08201	7.97703e-09	2.73005e-09
PPTG_17356		30.9041	3.87433	3.81149	-3.05548	-2.98133	2.30482e-21	2.14648e-20
PPTG_13822		12.5828	5.09218	4.95679	-1.3449	-1.31227	1.77941e-13	7.50321e-13
PPTG_15679		9.30045	23.5809	26.9267	1.30362	1.56666	1.39337e-13	2.89906e-19
PPTG_17284		14.6403	37.2412	40.4366	1.30543	1.49995	7.97151e-22	1.25925e-28
PPTG_12501		8.90526	22.7374	24.1496	1.30698	1.47241	4.75444e-13	2.39338e-16
PPTG_19920		57.3907	22.7852	22.2276	-1.39454	-1.33274	8.06979e-06	2.2102e-05
PPTG_04378		19.6724	77.5481	74.2462	1.93534	1.9459	8.91024e-15	6.14205e-15
PPTG_22754		15.2909	50.7235	56.9015	1.67572	1.93556	0.0131218	0.00375872
PPTG_13143		54.6651	7.28145	2.60211	-2.95364	-4.35313	0.000644861	3.03045e-07
PPTG_07260		21.1001	6.9479	6.04355	-1.65469	-1.76855	3.91604e-19	1.71853e-21
PPTG_18991		14.6156	31.6113	33.5009	1.06766	1.22939	3.32995e-15	6.39886e-20
PPTG_16283		20.5196	8.13389	7.45812	-1.37583	-1.43128	2.74025e-12	3.8241e-13
PPTG_23612		7.09744	1.11616	1.3744	-2.69386	-2.33979	6.88658e-08	3.43142e-06
PPTG_16368		24.9094	6.19082	4.67598	-2.04842	-2.3786	1.3731e-21	4.91075e-28
PPTG_18209		21.8863	9.04104	9.72449	-1.32676	-1.13718	1.08894e-11	7.00241e-09
PPTG_14847		12.1653	25.6384	28.6647	1.02489	1.27409	0.0208688	0.00337564
PPTG_12312		52.6402	6.67761	5.47286	-3.01531	-3.23188	1.21899e-44	5.21677e-49
PPTG_11807		11.8054	26.6085	27.2637	1.13308	1.23616	6.57978e-05	1.1726e-05
PPTG_19543		7.73245	22.3466	23.6724	1.48284	1.64687	0.000354732	6.24985e-05
PPTG_12973		17.0403	4.5479	4.80644	-1.94298	-1.78369	0.0168758	0.031114
PPTG_11071		18.6045	3.24529	3.20436	-2.55123	-2.50691	1.67534e-19	7.53339e-19
PPTG_08575		9.58485	21.1649	23.8868	1.10119	1.35035	5.34347e-09	4.15141e-13
PPTG_09937		22.8417	52.6171	55.298	1.16236	1.30986	1.63037e-09	7.33658e-12
PPTG_14255		17.9591	5.57594	5.61149	-1.7524	-1.64091	3.18708e-06	1.46378e-05
PPTG_15460		9.77038	22.2839	25.6492	1.14791	1.42599	1.29626e-10	5.90807e-16
PPTG_15913		24.7389	2.99335	3.3339	-3.06959	-2.85758	2.89182e-10	4.81877e-09
PPTG_02668		16.8465	45.5523	46.3791	1.39251	1.49321	6.33578e-08	5.68999e-09
PPTG_09188		37.8323	224.283	211.929	2.53475	2.51404	2.01967e-07	2.63289e-07
PPTG_15008		17.4647	7.02859	6.18269	-1.3525	-1.47171	2.14445e-05	3.4803e-06
PPTG_04623		13.5885	35.3889	37.1984	1.32942	1.49013	3.39707e-09	2.44241e-11
PPTG_16374		32.1319	5.88888	6.16967	-2.49915	-2.34492	1.08396e-34	7.79765e-31
PPTG_16199		12.8219	3.00859	2.42309	-2.13534	-2.37599	6.83846e-06	4.92584e-07
PPTG_17798		43.7073	4.40155	4.4266	-3.34008	-3.27169	7.7766e-20	4.3978e-19
PPTG_17711		66.9096	26.6421	22.8998	-1.383	-1.51537	3.60772e-16	6.25055e-19
PPTG_18735		8.80468	23.3154	23.9381	1.36148	1.47632	1.08112e-14	3.87776e-17
PPTG_12760		10.4959	0.641311	0.359729	-4.03971	-4.83449	1.40954e-06	7.79266e-09
PPTG_16196		114.155	1.88434	2.46499	-6.00526	-5.49882	3.00155e-35	8.35693e-32
PPTG_16839		15.132	7.70886	7.16566	-1.00777	-1.04282	1.58899e-05	8.01666e-06
PPTG_05336		13.863	32.1418	31.9925	1.16706	1.24118	4.29986e-14	7.81974e-16
PPTG_03694		7.47659	3.55882	3.53317	-1.11241	-1.05066	3.9377e-08	2.41648e-07
PPTG_17352		16.1064	6.62017	5.88555	-1.3289	-1.41708	4.34283e-05	1.2366e-05
PPTG_16433		23.3837	11.4289	8.09335	-1.08636	-1.49937	1.51998e-09	6.08896e-17
PPTG_02421		19.9673	48.2831	47.9996	1.22615	1.29784	9.17619e-17	1.12632e-18
PPTG_03547		18.2356	8.07708	7.39434	-1.22106	-1.2726	7.21364e-15	5.99007e-16
PPTG_08386		8.47012	4.15216	4.01512	-1.06869	-1.044	1.16052e-06	2.24302e-06
PPTG_11288		14.124	5.33785	4.50575	-1.44894	-1.61638	3.02493e-14	2.93763e-17
PPTG_04815		12.1836	29.3505	27.5756	1.2226	1.21308	1.14044e-21	2.58067e-21
PPTG_10675		29.5737	63.0529	58.9592	1.04445	1.02805	7.69708e-09	1.41856e-08
PPTG_14383		17.2455	52.3517	55.1299	1.55476	1.71005	9.84117e-26	4.97948e-31
PPTG_01439		13.0457	28.1447	26.2253	1.06571	1.03552	1.03968e-05	2.00132e-05
PPTG_04975		11.6685	24.8044	26.3992	1.04595	1.21009	1.44621e-09	1.59083e-12
PPTG_00885		9.16462	24.3563	20.7	1.36258	1.2042	4.5845e-10	4.87219e-08
PPTG_13430		8.47228	32.3404	35.5629	1.89144	2.10357	4.5556e-18	3.79971e-22
PPTG_01957		11.2974	0.09654	0.0338507	-6.93945	-8.38397	1.24018e-56	3.12222e-37
PPTG_19400		8.80157	4.16092	4.19607	-1.12486	-1.04045	0.000354299	0.00106272
PPTG_14419		12.8972	4.46855	3.61306	-1.57298	-1.80548	2.51555e-06	5.65973e-08
PPTG_00186		5.76543	2.24939	2.38018	-1.39405	-1.24119	1.79816e-09	1.03198e-07
PPTG_00838		36.3987	125.847	126.654	1.74481	1.83247	1.86303e-27	3.20209e-30
PPTG_10177		14.1533	5.46101	5.08284	-1.41925	-1.44608	5.1098e-15	1.81946e-15
PPTG_18910		21.2389	132.854	117.94	2.60005	2.50638	1.5892e-37	7.56407e-35
PPTG_18940		14.3745	53.7908	54.413	1.8548	1.96198	0.00906477	0.0056609
PPTG_19456		10.6666	22.6647	21.8676	1.04599	1.06256	0.00150981	0.00127964
PPTG_02121		25.4776	388.373	501.048	3.90765	4.32226	2.23121e-16	7.69087e-20
PPTG_01825		29.2829	69.8603	66.0699	1.20738	1.20554	3.39252e-13	3.89018e-13
PPTG_14464		9.4877	29.4322	32.5604	1.59258	1.81183	2.1591e-12	8.40503e-16
PPTG_17918		11.7814	24.6207	29.1145	1.02307	1.34898	0.030886	0.00344939
PPTG_05140		8.19282	18.8664	21.7052	1.16294	1.4389	1.76679e-06	1.96852e-09
PPTG_08306		24.8387	116.962	81.5609	2.18977	1.7481	5.36605e-08	2.05031e-05
PPTG_02897		16.8473	61.3874	65.1476	1.82405	1.98534	3.83144e-19	1.59812e-22
PPTG_17696		13.6673	5.70764	5.54383	-1.2965	-1.27014	3.26932e-07	6.00907e-07
PPTG_02147		10.1423	2.93349	3.17278	-1.82959	-1.64379	5.62294e-22	4.23478e-18
PPTG_16639		13.3892	29.3385	30.7714	1.08586	1.23263	1.11494e-09	3.06175e-12
PPTG_01518		23.3403	65.3134	70.0479	1.43865	1.61716	1.60053e-22	2.51475e-28
PPTG_17487		18.3455	2.39178	2.98264	-2.99004	-2.57533	1.43296e-09	2.19129e-07
PPTG_01711		17.129	39.7218	35.3034	1.16888	1.07538	4.85906e-09	9.09067e-08
PPTG_05510		13.3101	37.4025	40.8235	1.44959	1.64972	1.57571e-13	2.77228e-17
PPTG_23032		25.2749	4.00353	4.32757	-2.68968	-2.51292	2.60668e-38	5.84064e-34
PPTG_09439		17.0418	37.6846	40.8168	1.09383	1.29915	0.00614188	0.000934828
PPTG_17357		27.8764	3.25081	3.26521	-3.14042	-3.0637	3.99113e-19	2.89002e-18
PPTG_01148		17.8709	5.76471	6.52066	-1.65776	-1.42412	1.54049e-05	0.000252113
PPTG_01366		11.3785	4.97222	5.27843	-1.22313	-1.07967	3.9285e-05	0.000339791
PPTG_15958		18.9214	3.10269	2.27003	-2.65446	-3.02492	8.68823e-37	8.70645e-45
PPTG_16052		12.9235	33.446	36.6959	1.33288	1.53847	1.29831e-12	1.54371e-16
PPTG_08102		6.1375	2.44936	2.44015	-1.3647	-1.29986	3.37534e-10	2.43882e-09
PPTG_14224		16.6639	57.8197	55.8125	1.74382	1.77816	2.53939e-32	1.52084e-33
PPTG_13283		23.4163	5.64213	5.45329	-2.10146	-2.07285	3.02387e-41	7.01451e-40
PPTG_09912		18.9469	4.35426	4.10366	-2.16039	-2.17515	2.00934e-33	1.50283e-33
PPTG_16187		11.6687	4.7329	4.64442	-1.34509	-1.29759	1.33114e-05	2.91454e-05
PPTG_01679		23.4817	11.2267	9.46346	-1.11354	-1.28175	0.000183809	1.39871e-05
PPTG_15906		6.8556	14.5006	13.9921	1.04379	1.05844	1.54416e-05	1.18136e-05
PPTG_00336		8.69894	18.3399	17.4668	1.0211	1.03887	2.77166e-07	1.69786e-07
PPTG_20135		25.8848	5.7353	4.68186	-2.20674	-2.43627	5.98528e-16	7.02544e-19
PPTG_03384		11.3734	29.7907	31.6156	1.34347	1.51101	1.42434e-06	4.69506e-08
PPTG_04866		14.0765	39.3228	38.4161	1.43578	1.4813	3.36796e-25	8.7531e-27
PPTG_07340		8.48741	24.6137	26.3239	1.49538	1.66535	7.56287e-16	1.79415e-19
PPTG_07727		11.473	0	0	-11.6091	-11.5533	1.36545e-20	2.14831e-20
PPTG_13075		22.3192	7.187	6.56498	-1.69411	-1.73334	6.55608e-10	2.66265e-10
PPTG_03071		7.03472	2.52624	3.32686	-1.51068	-1.05029	1.02668e-05	0.00303513
PPTG_07613		17.9836	62.4622	65.3685	1.74983	1.8948	4.38704e-19	3.06783e-22
PPTG_10099		37.4776	15.87	11.9821	-1.29654	-1.6134	9.27212e-09	8.60001e-13
PPTG_09906		10.5094	3.83568	3.51923	-1.5039	-1.5458	3.97151e-14	8.53967e-15
PPTG_08810		11.3896	24.7865	25.597	1.08248	1.20048	4.26551e-08	9.39457e-10
PPTG_00620		8.41487	17.4852	18.0495	1.01014	1.13583	1.60565e-10	4.3519e-13
PPTG_11740		12.4899	38.4614	42.8243	1.57806	1.81052	4.8118e-22	7.67483e-29
PPTG_17988		12.4612	40.0409	43.7752	1.64198	1.84666	2.12199e-15	2.79914e-19
PPTG_00436		11.6928	1.89837	2.16896	-2.66911	-2.39899	4.56099e-31	1.21104e-25
PPTG_11691		14.3639	6.46806	6.02973	-1.20802	-1.22185	5.12205e-13	3.26266e-13
PPTG_03508		14.2035	62.276	57.9432	2.09964	2.05741	0.00310603	0.00395899
PPTG_10446		12.0903	3.83958	3.62572	-1.67898	-1.70937	3.75143e-05	2.7606e-05
PPTG_15342		10.657	23.9947	21.508	1.12381	1.04496	1.20995e-13	6.88714e-12
PPTG_15119		16.0149	36.0348	35.374	1.12671	1.17541	7.66734e-13	6.7184e-14
PPTG_16051		4.74754	0.929455	1.11108	-2.3959	-2.06384	8.2783e-14	1.38139e-10
PPTG_10507		16.2656	66.1496	60.3792	1.96485	1.92185	3.09546e-22	2.6466e-21
PPTG_15594		9.55079	24.9917	29.2663	1.3542	1.65814	0.00186468	0.000103672
PPTG_02193		23.8454	61.632	54.5319	1.31672	1.2255	6.79903e-20	2.63884e-17
PPTG_00269		18.6257	47.9139	42.7235	1.31055	1.23049	2.14216e-25	2.07743e-22
PPTG_16515		18.2574	55.7403	57.2017	1.56192	1.68135	9.96797e-23	2.91642e-26
PPTG_19556		8.81869	45.1209	64.5854	2.33519	2.92224	0.028244	0.00504893
PPTG_02804		9.47487	2.25472	1.80758	-2.12041	-2.35666	2.54901e-29	1.25668e-34
PPTG_18840		11.4824	23.8063	24.8102	1.01347	1.143	8.97021e-07	2.34205e-08
PPTG_14265		2.87215	6.55593	6.09525	1.13553	1.12106	0.000750707	0.00092113
PPTG_08629		7.63277	2.77606	3.13573	-1.49974	-1.25136	1.94852e-08	3.53438e-06
PPTG_08215		13.3857	5.233	4.79347	-1.39521	-1.45136	4.07257e-12	6.20216e-13
PPTG_17128		6.82413	18.0415	17.6304	1.34795	1.40281	1.76758e-10	2.76691e-11
PPTG_13016		10.6006	1.90547	1.92101	-2.51103	-2.43156	1.66737e-30	1.06215e-28
PPTG_11692		10.0332	3.64058	3.88598	-1.50264	-1.33311	1.18324e-08	4.98743e-07
PPTG_10946		10.3932	27.8086	27.6138	1.37564	1.44281	4.32389e-15	1.56271e-16
PPTG_11390		32.1297	1.56239	3.96589	-4.41893	-2.97222	1.25879e-15	6.02949e-08
PPTG_12047		12.8563	39.4017	44.3719	1.57466	1.82112	1.99974e-13	1.11261e-17
PPTG_16397		36.6734	9.39535	7.93261	-2.01814	-2.17664	6.14998e-34	4.76624e-38
PPTG_04587		0.452178	0.175646	0.191259	-1.41346	-1.21028	2.72541e-06	7.24907e-05
PPTG_10599		10.7908	1.86685	2.14767	-2.56223	-2.29816	1.92041e-13	4.36583e-11
PPTG_08418		19.6072	5.89461	7.71431	-1.76309	-1.31333	4.12839e-12	3.14811e-07
PPTG_11091		17.6331	48.4139	51.1716	1.40681	1.57525	0.0113544	0.00426075
PPTG_01906		10.9099	3.46228	2.87751	-1.69948	-1.88662	3.76629e-15	3.5108e-18
PPTG_11891		11.0057	24.7128	23.9942	1.12216	1.1562	2.31665e-12	4.62828e-13
PPTG_12419		11.3357	1.56305	1.53839	-2.89398	-2.85076	1.50154e-27	1.01112e-26
PPTG_07513		25.3046	8.61432	7.84265	-1.58671	-1.65887	5.91996e-11	7.92648e-12
PPTG_17723		38.6086	15.039	18.1384	-1.41826	-1.04974	0.000457184	0.0121329
PPTG_13977		12.3825	5.22909	4.71145	-1.2868	-1.36289	3.26415e-07	6.28147e-08
PPTG_05912		20.3228	45.5382	44.3599	1.12	1.16057	1.58107e-09	3.60407e-10
PPTG_16776		13.8368	33.1991	31.7181	1.21293	1.22954	8.52509e-13	4.14159e-13
PPTG_03942		8.60758	20.2507	22.7569	1.19453	1.43635	2.13267e-09	3.24261e-13
PPTG_04880		11.7641	35.0409	38.6554	1.53204	1.75273	1.24425e-12	2.73872e-16
PPTG_19802		26.3912	89.7417	74.533	1.71609	1.53023	9.45982e-23	3.04799e-18
PPTG_14032		13.7456	32.5491	31.8892	1.19815	1.246	8.13302e-19	2.89012e-20
PPTG_16972		6.68999	14.2288	15.1571	1.04687	1.2128	8.62665e-08	3.7031e-10
PPTG_04338		12.7895	27.2016	25.7808	1.04051	1.04194	2.26486e-14	2.14163e-14
PPTG_19853		9.24943	4.25566	3.90189	-1.16475	-1.21499	1.54503e-14	1.43352e-15
PPTG_12395		0.944903	2.01954	2.14762	1.04302	1.21934	1.81386e-08	2.87786e-11
PPTG_14232		27.2157	6.31246	6.36326	-2.14134	-2.05826	3.46892e-07	1.04597e-06
PPTG_10577		6.15054	3.00548	2.81471	-1.07959	-1.0971	3.24602e-11	1.69503e-11
PPTG_16077		9.83251	0.589329	0.510649	-4.11228	-4.24004	3.23483e-20	4.98081e-21
PPTG_13350		18.8717	61.2287	55.5809	1.65149	1.58784	2.05574e-05	4.67242e-05
PPTG_14673		24.211	2.20428	1.21106	-3.49876	-4.28719	2.81895e-25	5.70345e-33
PPTG_12301		15.7068	3.23316	3.3041	-2.31981	-2.217	1.33181e-12	1.30087e-11
PPTG_13184		10.3366	2.56284	2.76935	-2.04869	-1.86843	7.88387e-13	6.58508e-11
PPTG_17526		10.287	22.5565	23.6112	1.0929	1.24196	0.0291587	0.0122925
PPTG_10672		21.1849	1.91231	1.95765	-3.51082	-3.40605	6.33529e-18	5.47535e-17
PPTG_00327		15.3253	4.51573	3.94846	-1.80987	-1.92457	8.82213e-26	1.95709e-28
PPTG_11345		8.40601	18.3927	18.4242	1.0864	1.16406	7.20992e-12	1.66974e-13
PPTG_11260		6.56418	26.0208	23.4186	1.94638	1.86039	2.4931e-08	1.12802e-07
PPTG_09551		6.49115	14.4182	15.848	1.11023	1.32056	3.69484e-09	1.29817e-12
PPTG_14722		1.36613	0.130891	0.109974	-3.43022	-3.60397	1.42115e-35	9.21931e-38
PPTG_00166		7.5302	2.43399	2.27567	-1.67199	-1.68839	0.000330181	0.000294037
PPTG_08953		18.1352	1.83071	1.57709	-3.3463	-3.48833	4.46427e-37	2.49254e-39
PPTG_07556		15.4505	51.5846	55.6843	1.69221	1.88283	1.37101e-22	7.49958e-28
PPTG_05787		10.2563	1.56994	1.43032	-2.73687	-2.79197	0.003525	0.00296673
PPTG_16670		43.0055	17.4678	20.7502	-1.33564	-1.02143	1.35158e-06	0.00029804
PPTG_04839		18.5904	43.9989	41.2371	1.1945	1.18326	1.18257e-10	1.79314e-10
PPTG_07184		25.2726	103.034	83.7168	1.97943	1.75941	1.3557e-19	1.1987e-15
PPTG_02979		15.8059	5.2258	5.14313	-1.64395	-1.58842	2.38574e-09	8.72232e-09
PPTG_19566		11.2197	0	0	-11.4504	-11.3945	6.78909e-20	1.04875e-19
PPTG_23737		25.1327	6.86159	8.81148	-1.90119	-1.47914	8.01052e-12	1.2724e-07
PPTG_12865		20.4613	6.82514	7.37976	-1.63819	-1.44143	1.09202e-09	9.74981e-08
PPTG_00598		9.32897	0.263561	0.15632	-5.18061	-5.85973	1.20801e-19	1.68465e-22
PPTG_03944		11.8704	25.2394	27.1464	1.04528	1.22467	2.46084e-08	3.90634e-11
PPTG_14815		3.80214	8.14796	7.78541	1.05557	1.06663	7.46561e-14	4.19512e-14
PPTG_11328		9.30304	2.20913	1.95043	-2.12271	-2.22049	1.13704e-20	2.9921e-22
PPTG_17597		11.616	2.45748	2.12757	-2.27422	-2.41367	3.78465e-18	5.84783e-20
PPTG_06460		12.5861	6.33983	5.3851	-1.03547	-1.18761	6.74698e-05	4.24879e-06
PPTG_01580		8.58785	2.09814	2.30246	-2.09034	-1.85985	3.15565e-08	9.95715e-07
PPTG_18153		7.58689	41.5054	37.8684	2.39909	2.34676	2.02824e-24	2.10302e-23
PPTG_08507		8.00463	19.085	17.86	1.21734	1.19066	2.78123e-08	6.09701e-08
PPTG_23773		36.5432	116.088	94.7516	1.61137	1.40733	1.03018e-15	3.54458e-12
PPTG_08989		5.10364	91.1251	103.143	4.10316	4.37312	9.302e-28	1.94593e-31
PPTG_06244		10.1046	4.47791	4.03719	-1.22661	-1.29104	7.00251e-08	1.42787e-08
PPTG_24065		12.388	30.2916	27.5841	1.24203	1.18635	2.76147e-09	1.55608e-08
PPTG_19430		18.9233	2.39722	1.52885	-3.03571	-3.59998	7.61517e-21	5.35198e-27
PPTG_13569		5.75757	73.7468	74.9344	3.6406	3.7299	1.9602e-20	2.13497e-21
PPTG_12080		10.287	21.3893	20.5731	1.01173	1.03295	9.45531e-15	2.4872e-15
PPTG_10349		7.28095	20.7543	23.1558	1.4672	1.70258	1.05341e-12	7.88217e-17
PPTG_01131		7.72416	3.9705	3.7393	-1.01605	-1.0141	3.70392e-09	4.38782e-09
PPTG_13641		30.2408	0	0	-11.1881	-11.1322	5.1128e-19	7.80491e-19
PPTG_01066		23.1475	0.859301	0.91797	-4.79102	-4.62328	1.00134e-63	1.36919e-61
PPTG_06069		5.20331	0.64588	0.898553	-3.05234	-2.50052	1.33315e-15	5.61187e-11
PPTG_04521		13.1414	2.66876	3.64678	-2.34812	-1.80408	1.95284e-05	0.00136083
PPTG_19975		52.6622	0.8179	0.547359	-6.02828	-6.54445	1.04821e-22	5.31558e-24
PPTG_06366		31.8459	11.8277	11.9082	-1.48019	-1.38612	2.77331e-06	1.28589e-05
PPTG_01302		11.8953	1.21025	0.87426	-3.35316	-3.7319	4.79095e-28	5.9733e-33
PPTG_19353		9.58526	26.6479	25.038	1.43276	1.41343	2.07528e-09	3.56801e-09
PPTG_03695		6.55251	1.94127	2.32116	-1.77516	-1.47129	2.98164e-05	0.000673775
PPTG_25008		55.3711	6.92144	6.90256	-3.04882	-2.96563	4.0039e-25	6.83533e-24
PPTG_09146		13.7696	3.6227	2.36893	-1.97603	-2.50742	1.17268e-08	4.64672e-13
PPTG_07348		8.94924	3.28509	2.71252	-1.49708	-1.69033	1.3323e-09	7.67605e-12
PPTG_17927		3.87345	1.83339	1.75109	-1.13096	-1.11058	9.45243e-08	1.76513e-07
PPTG_04854		6.48285	2.84309	2.58061	-1.24181	-1.29527	6.90884e-06	2.76481e-06
PPTG_05202		16.3411	64.392	71.4724	1.93846	2.1623	1.14754e-05	8.13757e-07
PPTG_04157		8.16912	22.8197	24.2865	1.44221	1.60587	7.51125e-18	5.99351e-22
PPTG_19732		8.5268	3.64657	3.69832	-1.2558	-1.17542	9.95483e-05	0.000301358
PPTG_08949		16.5739	1.63298	1.69697	-3.387	-3.26098	1.3354e-11	7.26535e-11
PPTG_13998		22.7379	8.24527	6.96017	-1.51384	-1.67567	1.33128e-07	5.01523e-09
PPTG_14188		8.28806	20.5507	17.1672	1.26367	1.08288	1.94894e-17	5.94797e-13
PPTG_19139		15.0344	5.4223	4.22393	-1.53077	-1.80164	2.53928e-12	2.70659e-16
PPTG_09436		15.5885	1.73704	2.49377	-3.20061	-2.59192	0.00383841	0.0225987
PPTG_20023		14.817	4.17121	4.00478	-1.86405	-1.85594	1.39136e-11	1.83478e-11
PPTG_16908		11.4178	4.27422	3.63979	-1.45989	-1.60403	0.0217294	0.0113036
PPTG_07612		5.60947	2.3148	1.91159	-1.33684	-1.52238	0.000135573	1.19636e-05
PPTG_10233		18.6481	3.57713	3.67563	-2.41655	-2.31394	6.14926e-22	2.59885e-20
PPTG_08885		3.66169	10.8019	10.071	1.51761	1.48953	6.98085e-27	7.10789e-26
PPTG_20351		12.973	2.01462	2.68895	-2.71504	-2.23845	7.28957e-09	2.26106e-06
PPTG_02475		14.6994	68.0282	80.8065	2.19271	2.48796	0.0364969	0.0165963
PPTG_09910		15.3158	35.1515	34.7022	1.14933	1.21128	1.56933e-13	6.14205e-15
PPTG_00739		8.18051	1.00195	1.19259	-3.06344	-2.74588	1.39953e-31	2.07988e-26
PPTG_02581		14.1531	43.3651	42.8889	1.56924	1.63199	3.0935e-23	4.29116e-25
PPTG_19256		8.07607	3.40789	3.64297	-1.2811	-1.10956	0.0195092	0.0484321
PPTG_11552		6.53667	16.3914	18.2767	1.28651	1.51416	3.12081e-12	1.17068e-16
PPTG_11040		11.5289	3.83504	4.50863	-1.61434	-1.32712	1.30936e-05	0.000422364
PPTG_00531		9.64519	25.8106	29.1717	1.36972	1.62481	7.65576e-06	7.70789e-08
PPTG_11689		14.0313	5.82178	5.55457	-1.32331	-1.29933	1.18212e-06	2.00518e-06
PPTG_03227		18.3513	40.4779	40.0007	1.09319	1.15638	1.15216e-14	2.5393e-16
PPTG_09723		7.80432	17.7028	15.3897	1.13929	1.01232	5.30327e-14	3.45905e-11
PPTG_01539		14.9464	32.059	30.8714	1.04997	1.07803	6.39438e-17	9.06143e-18
PPTG_02774		6.2073	2.27206	2.24757	-1.4959	-1.42634	3.80292e-06	1.16547e-05
PPTG_02764		6.0874	14.0982	13.5909	1.15717	1.19716	0.000140651	7.92265e-05
PPTG_15997		14.8493	2.44327	2.29812	-2.65179	-2.65439	7.85707e-16	8.40503e-16
PPTG_07581		8.31293	1.58001	2.34411	-2.42503	-1.78991	3.3603e-13	8.55073e-08
PPTG_15912		15.28	1.90542	2.58599	-3.02763	-2.53311	7.50251e-09	1.57777e-06
PPTG_16468		16.1874	51.1216	47.881	1.62137	1.59164	0.00052838	0.000701663
PPTG_03927		2.05616	4.47948	4.57544	1.07894	1.19038	0.00100737	0.000256284
PPTG_16942		9.64712	20.2268	21.1898	1.02633	1.16904	3.04966e-14	2.91106e-18
PPTG_01316		16.2882	3.17608	2.82546	-2.40929	-2.49892	1.08401e-10	2.23498e-11
PPTG_19143		7.55562	20.13	23.8044	1.37393	1.68849	4.47471e-14	7.12649e-21
PPTG_00433		11.3894	3.65605	3.7961	-1.67237	-1.55165	4.37358e-11	1.05517e-09
PPTG_17806		10.5127	3.06556	3.94105	-1.81071	-1.38265	1.13992e-05	0.00106356
PPTG_13100		5.35469	1.90228	2.21894	-1.53714	-1.23529	4.0754e-06	0.000277197
PPTG_15967		8.07921	3.05444	2.66549	-1.46222	-1.56875	2.15303e-09	1.43799e-10
PPTG_11984		55.7743	14.0961	15.7366	-2.02753	-1.79161	1.49292e-08	6.26093e-07
PPTG_23663		50.552	9.13974	8.94846	-2.50341	-2.46548	3.27761e-13	8.02398e-13
PPTG_11835		3.64582	8.22868	8.66209	1.14047	1.27854	0.000103066	1.10433e-05
PPTG_08628		11.7285	51.7069	52.2502	2.09164	2.18881	2.15921e-18	4.66639e-20
PPTG_01339		11.5866	4.55885	5.37226	-1.3749	-1.07969	6.59919e-07	0.000124185
PPTG_12068		13.5378	3.26886	3.49809	-2.08915	-1.92091	8.80566e-29	7.57765e-25
PPTG_05270		6.30401	14.2739	13.9344	1.13964	1.17732	1.72328e-13	2.47383e-14
PPTG_20073		29.3491	235.638	163.134	2.94778	2.50394	5.74478e-13	1.35485e-09
PPTG_09512		6.64428	3.26302	2.9601	-1.07663	-1.13313	6.07775e-07	1.56203e-07
PPTG_05084		11.4141	0.936597	0.862664	-3.64448	-3.68714	3.64834e-28	2.2972e-28
PPTG_06382		4.78579	0.554942	0.357103	-3.13203	-3.70623	5.61913e-09	6.7553e-12
PPTG_16959		7.30082	18.4286	15.5729	1.28662	1.11976	5.1957e-05	0.000531617
PPTG_09239		8.36838	3.24382	2.74036	-1.43066	-1.57587	3.54858e-07	2.06252e-08
PPTG_07262		11.7186	67.4321	61.9518	2.46359	2.43683	5.22378e-25	1.70838e-24
PPTG_02108		3.44577	0	0	-11.0288	-10.9729	1.45338e-18	2.2364e-18
PPTG_17477		7.55426	2.57807	3.16597	-1.58854	-1.22	1.22097e-10	9.47288e-07
PPTG_03429		3.44613	0.41998	0.371762	-3.08079	-3.18275	4.48517e-37	3.41736e-38
PPTG_18837		17.1306	98.0102	95.1489	2.45772	2.51348	0.00334137	0.00270906
PPTG_11832		9.32384	0.495286	0.446799	-4.2913	-4.3489	4.14938e-12	2.60664e-12
PPTG_03064		8.36745	1.94741	2.52043	-2.12216	-1.69945	1.05286e-05	0.000521842
PPTG_06297		6.73672	1.19472	0.94648	-2.53706	-2.80129	5.72665e-15	1.65353e-17
PPTG_17572		5.83813	12.5104	11.9083	1.05712	1.05517	3.20945e-08	3.59609e-08
PPTG_18863		6.83676	15.4066	15.8205	1.12787	1.24256	1.11644e-06	6.81325e-08
PPTG_07369		9.98116	1.41639	1.32844	-2.86338	-2.86917	2.67102e-09	2.62403e-09
PPTG_13686		24.9286	11.3192	5.61347	-1.20052	-2.12152	6.923e-08	8.706e-21
PPTG_03208		17.791	7.53738	7.2959	-1.29396	-1.25066	1.08269e-05	2.32328e-05
PPTG_15248		5.84161	2.93257	2.6374	-1.03003	-1.11153	0.00739518	0.00375872
PPTG_24288		20.0749	7.91199	8.14369	-1.38075	-1.27325	1.02079e-06	7.5593e-06
PPTG_18295		10.0893	24.5335	22.4935	1.23057	1.18836	6.15188e-12	3.55112e-11
PPTG_03989		5.84431	14.7847	15.5926	1.29863	1.44722	1.2815e-09	9.4462e-12
PPTG_05608		10.3986	33.2898	37.3129	1.63776	1.87908	6.31073e-18	2.24302e-23
PPTG_13985		12.1732	3.43573	3.68536	-1.87907	-1.69345	8.89593e-13	1.25296e-10
PPTG_10186		12.6555	6.38535	6.00567	-1.03668	-1.04379	5.82516e-08	5.29698e-08
PPTG_16872		12.2369	5.71605	4.91097	-1.14313	-1.28618	5.45212e-06	2.96514e-07
PPTG_16896		3.82876	8.84507	9.18386	1.17047	1.29405	5.64336e-09	8.75387e-11
PPTG_16712		12.7901	5.69304	5.80781	-1.21514	-1.10154	0.003173	0.00830677
PPTG_22808		122.399	53.4469	58.3834	-1.25617	-1.03111	0.00548198	0.0263446
PPTG_18736		9.74655	28.5441	27.0498	1.51182	1.50588	1.76609e-07	2.04654e-07
PPTG_05526		14.8823	5.53859	6.05848	-1.47454	-1.26665	2.27913e-11	9.82121e-09
PPTG_14314		3.39453	8.40053	8.65594	1.27288	1.38213	6.61969e-07	5.8314e-08
PPTG_00974		9.23157	29.2883	25.7839	1.61359	1.51593	1.59702e-22	6.08475e-20
PPTG_16692		6.03924	0.662759	1.05383	-3.22333	-2.48806	2.23607e-21	5.13464e-14
PPTG_17427		8.04051	3.62086	3.33066	-1.19677	-1.24089	4.87071e-11	1.04632e-11
PPTG_24389		9.94125	67.2485	57.5665	2.70497	2.57527	0.00149242	0.00271692
PPTG_09278		2.87945	0.851849	1.00246	-1.80119	-1.49143	4.6044e-17	2.89595e-12
PPTG_07533		16.2488	1.20542	1.0606	-3.79403	-3.89226	2.31327e-07	1.19207e-07
PPTG_06427		10.8681	2.41239	2.27485	-2.23887	-2.22464	6.69589e-10	9.17368e-10
PPTG_08960		7.62011	2.8027	2.37996	-1.48826	-1.64829	2.68832e-09	4.63284e-11
PPTG_18289		9.41721	23.8707	25.2529	1.30265	1.45469	1.65296e-13	1.15024e-16
PPTG_07654		6.93659	1.48978	1.3652	-2.26098	-2.3169	5.55717e-12	1.90231e-12
PPTG_06523		9.36716	3.38573	3.57019	-1.5099	-1.35591	5.5107e-07	8.0505e-06
PPTG_11697		8.33685	3.10935	3.44604	-1.46339	-1.24513	3.80228e-10	1.13449e-07
PPTG_13909		11.5842	32.5057	34.7644	1.44334	1.61754	6.53849e-18	2.58148e-22
PPTG_05271		8.92743	0.954779	0.750268	-3.27873	-3.5368	3.37809e-41	2.64042e-44
PPTG_11263		6.06006	13.1731	12.8753	1.07847	1.12763	0.00894952	0.00622196
PPTG_14269		5.56324	1.01922	0.982568	-2.4763	-2.46899	3.29191e-11	4.04846e-11
PPTG_03449		6.78119	0.256939	0.25325	-4.7786	-4.71655	5.5895e-26	2.25843e-25
PPTG_23030		22.4098	3.02943	1.78622	-2.94034	-3.62012	3.74475e-14	1.34221e-19
PPTG_07821		21.3439	3.96627	3.78336	-2.48803	-2.46076	5.76113e-06	7.71872e-06
PPTG_09659		4.98614	1.78687	1.85128	-1.5181	-1.39862	5.43793e-13	3.18258e-11
PPTG_11138		7.36062	2.59616	2.94678	-1.54828	-1.29117	2.29719e-13	9.99772e-10
PPTG_11248		10.924	23.234	21.7412	1.03987	1.02163	9.1989e-12	2.30657e-11
PPTG_02244		9.22229	22.3572	23.9787	1.2352	1.41213	1.10567e-16	1.3447e-21
PPTG_12882		19.1151	6.60701	5.79842	-1.57087	-1.68254	1.10801e-06	1.8455e-07
PPTG_18220		7.97325	19.865	25.2605	1.27902	1.70182	0.00864196	0.000320938
PPTG_06274		7.1229	24.2937	26.3889	1.73268	1.92276	1.88873e-09	1.88521e-11
PPTG_09987		21.5769	80.1838	78.6968	1.84516	1.90189	3.03838e-31	3.80155e-33
PPTG_07002		11.0426	59.3185	62.809	2.36169	2.54278	0.000426129	0.000136964
PPTG_17796		32.6755	2.32532	2.92847	-3.84169	-3.45681	1.18925e-09	4.08963e-08
PPTG_13676		9.62279	3.91312	3.25432	-1.33822	-1.5367	2.83128e-06	7.53952e-08
PPTG_07695		11.8145	0.490582	0.403421	-4.65037	-4.84564	4.64887e-19	8.85253e-20
PPTG_16076		4.71475	1.7436	1.31251	-1.49307	-1.81237	6.81563e-08	5.97906e-11
PPTG_17671		9.8664	4.91199	4.60962	-1.04727	-1.06717	1.30973e-06	8.78817e-07
PPTG_01437		5.95754	15.6782	14.2807	1.3447	1.2909	5.29288e-17	1.04066e-15
PPTG_02258		2.74363	1.03309	0.994302	-1.4439	-1.4332	1.79281e-10	2.68822e-10
PPTG_08888		6.58537	19.3466	17.8799	1.50233	1.46684	8.2237e-31	2.66599e-29
PPTG_10761		14.8704	3.07087	2.58042	-2.33974	-2.48683	1.02077e-09	9.08462e-11
PPTG_02736		11.0783	23.9943	22.9063	1.06688	1.08059	3.54147e-11	1.91674e-11
PPTG_05396		10.2242	0.665192	0.795622	-3.996	-3.65673	5.8535e-40	1.02092e-35
PPTG_05773		16.063	4.12277	3.30165	-2.00982	-2.24428	1.98844e-08	3.59228e-10
PPTG_14157		51.0052	0.915184	0.92234	-5.87577	-5.74935	1.65552e-43	6.62584e-43
PPTG_01367		9.03117	3.38385	3.33454	-1.46322	-1.40404	4.08322e-09	1.84807e-08
PPTG_01050		26.0543	65.4761	55.7706	1.27414	1.12857	9.86145e-16	1.83999e-12
PPTG_05275		8.30243	18.6896	20.6195	1.12936	1.34344	7.25611e-09	3.25747e-12
PPTG_19200		7.23968	24.5894	19.7724	1.72546	1.47658	1.35195e-11	1.04616e-08
PPTG_08291		14.6364	65.5365	64.3999	2.10044	2.17169	5.58541e-15	5.73764e-16
PPTG_02566		7.32885	3.1427	2.96871	-1.26245	-1.26676	5.9479e-07	5.86215e-07
PPTG_09913		10.2286	1.75888	0.941138	-2.58389	-3.40916	5.19498e-22	6.76395e-33
PPTG_11581		5.75427	2.65854	2.07359	-1.16265	-1.43702	9.3235e-07	1.29816e-09
PPTG_03182		3.61306	1.15602	1.59832	-1.67373	-1.14542	8.71496e-08	0.000345818
PPTG_00627		22.0288	5.41065	8.84595	-2.06179	-1.28126	1.02752e-05	0.00869266
PPTG_08825		10.1204	22.0921	20.4438	1.07882	1.04487	1.72321e-14	1.34638e-13
PPTG_03664		11.8904	0	0	-10.571	-10.5151	1.97876e-16	2.8221e-16
PPTG_01566		16.5152	34.183	33.1866	1.00337	1.04377	1.71907e-05	7.51053e-06
PPTG_02608		9.42683	21.7079	21.6292	1.1562	1.22653	8.76029e-25	7.72944e-28
PPTG_10242		15.2903	45.3774	48.0212	1.5187	1.68155	0.000346312	6.40025e-05
PPTG_00437		8.06717	3.91828	3.14195	-1.07945	-1.32882	0.000771927	2.71596e-05
PPTG_00797		11.7881	42.2046	55.8549	1.79349	2.28983	0.0305554	0.00470521
PPTG_06748		19.2516	0.555204	0.397867	-5.17219	-5.55109	1.37543e-30	3.87001e-30
PPTG_16346		3.56347	1.14353	1.32337	-1.67915	-1.39921	3.07397e-08	4.53024e-06
PPTG_05975		16.4905	1.64906	2.24739	-3.36762	-2.84188	3.53367e-11	2.17711e-08
PPTG_22742		4.89374	1.27878	1.17431	-1.95517	-2.03154	2.88036e-05	1.41077e-05
PPTG_17502		6.36306	28.078	30.899	2.10175	2.32309	0.0171211	0.00800797
PPTG_18893		15.4215	0.342486	0.141909	-5.52564	-6.71931	5.22503e-22	3.00368e-23
PPTG_17126		26.6846	62.8615	57.6942	1.19018	1.14627	3.64092e-17	6.24052e-16
PPTG_03380		6.40071	17.4102	15.9103	1.40074	1.34721	2.61419e-38	3.33946e-35
PPTG_02499		7.84966	18.0122	18.7487	1.15905	1.28793	2.3468e-09	2.29166e-11
PPTG_14729		6.15103	14.6414	13.5181	1.19543	1.17093	2.21934e-06	3.86755e-06
PPTG_08330		6.72465	21.9108	23.3292	1.66838	1.82648	1.97132e-10	2.42758e-12
PPTG_05743		5.31732	12.1957	10.9112	1.14589	1.06815	2.52445e-11	6.26242e-10
PPTG_14575		8.76174	20.2398	18.9036	1.14768	1.14281	3.95379e-08	4.79907e-08
PPTG_01357		3.63236	9.5655	12.7333	1.3629	1.84557	0.000245396	3.42231e-07
PPTG_13160		11.2446	0.778881	0.400209	-3.88718	-4.77553	1.56215e-26	4.54677e-34
PPTG_19931		4.49372	1.91404	2.10901	-1.26609	-1.06465	1.49534e-05	0.000331023
PPTG_17282		4.1794	8.62837	8.85703	1.00676	1.12113	0.00644621	0.00220584
PPTG_02464		20.8373	5.10497	4.4315	-2.07637	-2.20122	1.18777e-05	3.50127e-06
PPTG_00435		7.61355	1.91995	1.22598	-2.04626	-2.60166	3.05217e-17	1.8373e-25
PPTG_13371		4.69591	10.463	10.7053	1.11063	1.22449	0.000259019	4.88504e-05
PPTG_07604		4.14145	1.08225	1.28637	-1.99231	-1.65662	3.41112e-26	2.63224e-19
PPTG_00626		13.3004	1.00134	1.62931	-3.757	-2.98445	6.40838e-11	1.6572e-07
PPTG_13101		6.96425	1.85515	2.19274	-1.95446	-1.6361	1.81782e-20	4.20422e-15
PPTG_16618		6.83656	1.32792	1.42902	-2.42511	-2.22872	2.19906e-18	6.99777e-16
PPTG_16587		7.48246	25.2003	28.2084	1.71501	1.95108	7.16115e-06	2.55108e-07
PPTG_19730		8.63114	4.48772	3.55829	-1.00021	-1.24848	0.00257513	0.000133331
PPTG_20402		62.4433	0	0	-10.556	-10.5001	9.02982e-17	1.31465e-16
PPTG_08954		11.5266	0.292982	0.0689181	-5.3161	-7.36216	4.3089e-29	9.28745e-25
PPTG_10909		9.30101	19.5866	18.7077	1.02455	1.04169	0.000173671	0.000135518
PPTG_18142		15.7963	40.0562	34.3036	1.28547	1.15256	3.84153e-07	6.65742e-06
PPTG_15994		3.92539	15.7057	16.882	1.96137	2.13835	7.4532e-14	2.54289e-16
PPTG_04591		4.77091	1.44441	1.16866	-1.76048	-1.99558	6.62819e-16	1.96473e-19
PPTG_16128		8.32811	3.97536	3.70553	-1.12005	-1.13505	1.12785e-05	9.09007e-06
PPTG_15059		14.8974	7.17318	6.51636	-1.10843	-1.16081	4.4803e-12	5.80333e-13
PPTG_13531		7.45937	28.5155	28.0855	1.89614	1.94528	4.60238e-16	7.11408e-17
PPTG_09267		7.05863	0.167533	0.107004	-5.48867	-6.02122	2.76085e-30	1.34189e-29
PPTG_18079		7.42083	15.806	15.6019	1.0452	1.10114	6.3618e-07	1.44387e-07
PPTG_04059		18.6348	41.5277	40.7293	1.10638	1.16447	5.34627e-13	2.63456e-14
PPTG_19542		10.6282	5.03602	4.57661	-1.13251	-1.17984	0.000895831	0.00054155
PPTG_02729		8.18103	3.59324	3.17701	-1.23341	-1.33024	2.94633e-06	4.76751e-07
PPTG_13912		5.14203	10.7089	11.9089	1.02364	1.24203	2.27879e-06	5.91167e-09
PPTG_02156		5.41848	0.777995	0.710374	-2.83479	-2.90224	1.12168e-32	3.06784e-33
PPTG_10161		4.02503	1.2341	1.10737	-1.74623	-1.83525	1.23781e-07	2.95852e-08
PPTG_05232		1.76812	0.731887	0.73013	-1.31348	-1.24285	0.000132576	0.000327521
PPTG_05241		10.9787	30.5238	27.0426	1.42492	1.33435	4.11485e-27	9.51496e-24
PPTG_21139		40.0393	13.9912	11.9742	-1.55555	-1.70451	1.9335e-08	8.02921e-10
PPTG_10149		3.96395	11.2837	11.3819	1.46388	1.55581	8.85662e-09	8.41948e-10
PPTG_11134		4.5229	1.27639	1.20695	-1.86548	-1.87248	1.15119e-16	1.12048e-16
PPTG_13937		9.05119	3.8562	3.68024	-1.27673	-1.26529	6.04542e-07	8.27482e-07
PPTG_03632		1.35685	0.664887	0.557453	-1.08236	-1.25165	1.48763e-06	2.61933e-08
PPTG_05358		14.5875	6.78043	6.55071	-1.15328	-1.1195	8.68584e-06	1.73826e-05
PPTG_13813		8.65988	21.0151	19.07	1.23388	1.17428	8.32727e-08	3.91385e-07
PPTG_00192		12.262	1.645	0.870344	-2.93372	-3.79029	4.44184e-24	1.68896e-32
PPTG_12838		6.89048	1.14549	1.99756	-2.6319	-1.75399	5.36286e-12	4.11141e-06
PPTG_05297		4.79072	10.1301	11.2143	1.03827	1.25647	4.30092e-07	5.38767e-10
PPTG_01890		13.674	0.0142327	0	-9.87705	-10.7829	1.07789e-14	2.36745e-17
PPTG_02688		38.8005	4.61942	4.35005	-3.10244	-3.1295	6.72482e-17	4.90361e-17
PPTG_11827		6.44937	3.1157	3.08158	-1.09721	-1.03348	0.00105097	0.00224139
PPTG_16848		5.56704	18.0012	20.8587	1.64786	1.9486	0.0302985	0.00933333
PPTG_18224		7.11023	2.3201	2.54042	-1.65979	-1.45233	1.64435e-09	1.44593e-07
PPTG_10381		7.68783	3.52817	2.67826	-1.16705	-1.49188	0.000257152	2.26729e-06
PPTG_09246		4.14386	1.71113	1.0987	-1.32741	-1.88562	2.46949e-08	6.50136e-15
PPTG_06846		4.19264	0.409504	0.341426	-3.38353	-3.56295	0.00550157	0.003464
PPTG_03488		5.86006	22.7886	17.7689	1.91206	1.62908	6.34125e-38	1.86684e-27
PPTG_03640		13.1655	4.5155	3.37267	-1.59732	-1.93724	0.00118992	6.92093e-05
PPTG_19071		7.35304	2.40829	2.75332	-1.6424	-1.38733	2.3875e-07	1.49401e-05
PPTG_17668		12.3501	1.60052	1.45121	-2.97843	-3.04741	1.43415e-07	8.14302e-08
PPTG_10063		15.6445	2.89532	1.98691	-2.48942	-2.94007	5.70454e-09	8.8885e-12
PPTG_13845		6.56516	2.27766	2.19431	-1.56148	-1.54841	3.36094e-10	5.22405e-10
PPTG_10046		8.36136	19.503	20.1144	1.17783	1.30281	4.4112e-11	2.16652e-13
PPTG_05596		15.7734	49.9638	40.2772	1.61207	1.385	3.31058e-23	2.93752e-17
PPTG_00674		2.32302	0.799297	0.883852	-1.59082	-1.36664	5.9382e-10	1.12023e-07
PPTG_03329		4.25415	25.786	33.2367	2.55724	3.00739	0.0265914	0.00819148
PPTG_17933		10.981	42.6548	54.6919	1.91777	2.3516	1.61968e-07	7.21503e-11
PPTG_12305		8.90638	2.48462	2.6486	-1.88595	-1.71183	1.83574e-08	3.57897e-07
PPTG_04568		11.8983	3.87522	2.79888	-1.66966	-2.04653	0.000724701	2.80298e-05
PPTG_17496		5.19661	2.34989	2.42215	-1.18667	-1.07146	3.67423e-05	0.000225147
PPTG_13800		5.34234	11.8437	10.7335	1.10963	1.04006	0.000711847	0.00169268
PPTG_14169		3.89875	1.19107	1.21223	-1.74093	-1.65402	1.23373e-10	1.02111e-09
PPTG_16702		21.5741	6.74248	5.15262	-1.71963	-2.03797	5.95005e-07	3.30009e-09
PPTG_08672		3.28132	6.87762	7.36694	1.02438	1.19826	3.1456e-12	1.65207e-16
PPTG_21961		3.19631	0	0	-10.7253	-10.6694	4.76814e-17	6.93376e-17
PPTG_11396		11.0139	2.98516	2.7378	-1.93526	-1.97471	1.44727e-06	9.31823e-07
PPTG_21216		7.63394	1.401	1.52802	-2.48449	-2.2909	5.05346e-09	7.76172e-08
PPTG_04752		11.8196	0.917965	0.646256	-3.76008	-4.15642	6.78452e-25	1.6503e-27
PPTG_14792		2.2982	1.12116	1.106	-1.07761	-1.0247	0.00111797	0.00213202
PPTG_19082		34.6993	84.9557	89.2649	1.23757	1.39882	3.00507e-06	1.02168e-07
PPTG_20337		11.7026	2.65596	3.59485	-2.18193	-1.67458	2.4815e-08	2.03398e-05
PPTG_03803		7.3971	1.42609	1.35511	-2.41091	-2.41543	6.37999e-14	6.89689e-14
PPTG_18615		5.64187	1.33344	1.23272	-2.11372	-2.16389	2.85952e-14	9.16666e-15
PPTG_11865		10.4238	4.08913	4.75793	-1.39939	-1.10031	8.92583e-07	0.000137719
PPTG_02886		8.15941	2.81859	2.70985	-1.57588	-1.55723	4.22481e-06	5.87941e-06
PPTG_00695		20.9536	8.38781	7.75289	-1.38079	-1.40147	2.14269e-10	1.34032e-10
PPTG_08894		6.69304	29.7504	27.5041	2.10539	2.06523	3.27052e-47	3.11554e-45
PPTG_04845		11.0118	42.3758	46.2847	1.89829	2.10663	2.71061e-20	7.68646e-25
PPTG_13256		6.02507	15.65	18.1777	1.33467	1.63005	3.94033e-12	9.095e-18
PPTG_08892		5.7393	0.240184	0.323839	-4.64883	-4.11095	4.0616e-29	9.83353e-27
PPTG_00827		9.29877	4.72337	3.40086	-1.02498	-1.42516	5.00111e-05	1.67382e-08
PPTG_21197		21.1846	5.78158	3.90057	-1.92446	-2.41089	4.17905e-12	1.46541e-17
PPTG_08738		16.9955	0.890446	0.508412	-4.31392	-5.00953	0.000548587	6.37959e-05
PPTG_10448		9.45587	1.86333	1.21579	-2.3969	-2.92531	5.93693e-11	4.66981e-15
PPTG_11287		7.91127	2.59404	1.85049	-1.65609	-2.06479	4.90026e-08	1.40838e-11
PPTG_05331		5.24614	22.6645	16.2679	2.05019	1.66375	1.80995e-24	2.62422e-16
PPTG_12159		6.87997	53.6649	72.1734	2.9228	3.42145	3.16234e-22	3.05601e-30
PPTG_11885		2.44339	0.819501	0.807393	-1.61402	-1.57002	1.31526e-08	3.58796e-08
PPTG_08771		22.894	65.157	63.1562	1.46113	1.5007	6.9908e-09	2.58306e-09
PPTG_08365		5.90697	0.0506644	0.265881	-6.94685	-4.42409	5.27185e-06	0.0016077
PPTG_15658		5.24957	17.8964	18.7656	1.73169	1.87314	3.13431e-14	1.59907e-16
PPTG_10125		6.97299	2.2631	2.56472	-1.66417	-1.41245	6.037e-06	0.000149808
PPTG_14871		10.2257	0	0	-10.2074	-10.1515	1.69027e-15	2.37247e-15
PPTG_12656		6.9125	19.4897	20.1323	1.45036	1.57669	4.06274e-21	7.39009e-25
PPTG_19715		11.9743	0.316182	0.335496	-5.28635	-5.11865	4.76814e-17	2.31742e-16
PPTG_07538		11.6864	4.42632	4.19858	-1.45679	-1.44772	1.6604e-06	2.10177e-06
PPTG_03096		6.44804	0.909865	0.136755	-2.8922	-5.52687	0.0016429	1.22294e-08
PPTG_11039		4.8878	2.22107	2.25584	-1.16925	-1.08406	2.24033e-05	9.62856e-05
PPTG_08962		11.0076	39.0636	39.7339	1.77595	1.88642	4.43412e-17	3.56379e-19
PPTG_08362		3.46906	18.231	22.5243	2.3598	2.74953	0.0138755	0.00369954
PPTG_08198		7.56431	45.1343	31.0654	2.51666	2.0722	4.75012e-13	4.13384e-09
PPTG_23568		12.3142	4.19684	4.82798	-1.60685	-1.30614	0.00758892	0.0347655
PPTG_18636		3.83535	1.2815	1.27138	-1.61747	-1.56392	1.82417e-11	8.8057e-11
PPTG_12039		5.2502	2.33758	2.2443	-1.21822	-1.19277	6.5274e-10	1.66928e-09
PPTG_12786		6.15934	13.5221	14.1675	1.08994	1.2308	1.01842e-08	6.67491e-11
PPTG_13687		4.5375	9.92925	9.25359	1.09157	1.05374	4.84734e-06	1.14391e-05
PPTG_23834		5.58807	2.79199	1.52227	-1.04877	-1.84339	0.000159596	3.11522e-11
PPTG_18218		8.44103	21.1893	20.7521	1.28924	1.33796	0.00865506	0.00641217
PPTG_03996		5.64834	1.93239	2.6141	-1.60814	-1.07237	0.000505257	0.0262935
PPTG_09212		4.98423	2.28461	2.09587	-1.16885	-1.21892	1.02473e-05	4.3774e-06
PPTG_08115		6.37385	2.37926	2.09394	-1.46746	-1.57243	9.10661e-05	2.72056e-05
PPTG_05269		6.64554	16.0298	14.146	1.22917	1.12183	1.38115e-17	1.06978e-14
PPTG_21699		7.8985	0	0	-10.4027	-10.3468	3.80458e-16	5.42014e-16
PPTG_09019		9.79591	4.45895	3.77785	-1.18233	-1.33929	0.000253293	3.12849e-05
PPTG_22188		26.4715	1.29808	0.884231	-4.40853	-4.87927	5.58841e-35	9.1066e-36
PPTG_23031		18.8451	2.47004	2.29961	-2.96864	-3.00201	2.09374e-13	1.42641e-13
PPTG_03895		4.58777	10.0436	10.0323	1.07443	1.16399	1.22401e-06	1.27568e-07
PPTG_11259		2.64284	8.29017	5.91023	1.59213	1.19288	2.33401e-13	8.20372e-08
PPTG_13207		16.828	0.138907	0.420298	-6.98219	-5.28581	3.97813e-07	5.83797e-05
PPTG_04352		6.55625	15.5624	13.3643	1.19236	1.06119	5.878e-07	1.12444e-05
PPTG_04611		10.7998	1.37604	1.32675	-3.02364	-2.98876	1.04526e-12	2.14244e-12
PPTG_01216		11.379	2.84076	1.94477	-2.04483	-2.51078	0.000349771	8.18368e-06
PPTG_21780		23.2076	142.632	143.811	2.56287	2.65806	5.34673e-09	1.29399e-09
PPTG_00401		9.02886	19.5102	20.6414	1.05549	1.22655	0.00012776	6.37133e-06
PPTG_00206		6.85536	38.5089	35.1369	2.4379	2.38724	2.75834e-22	2.14604e-21
PPTG_11372		1.31581	0.43809	0.458525	-1.6181	-1.4879	4.00166e-08	4.77108e-07
PPTG_06216		5.25137	1.92822	2.32881	-1.49285	-1.14272	7.15209e-08	4.43392e-05
PPTG_20919		27.0015	90.6516	82.4071	1.69505	1.63983	2.28288e-15	1.98526e-14
PPTG_19949		3.94704	0.240395	0.137608	-4.07309	-4.81348	7.95317e-16	8.9577e-18
PPTG_16235		5.60338	0.704761	0.939841	-3.01235	-2.54321	4.20106e-14	1.25156e-10
PPTG_06597		6.70244	0.933728	0.483783	-2.877	-3.76004	2.61232e-06	1.43543e-09
PPTG_07625		4.32158	121.356	79.3569	4.75761	4.22307	1.01875e-29	1.53063e-23
PPTG_24323		19.3814	5.0915	4.22629	-1.98126	-2.16247	8.9582e-14	1.04444e-15
PPTG_04101		4.84093	10.7556	9.4809	1.09836	1.00112	6.21638e-12	5.35351e-10
PPTG_22442		3.89018	65.4546	88.2423	4.03485	4.53561	1.51791e-29	3.78312e-37
PPTG_14175		6.63287	0.184357	0.164483	-5.20557	-5.31408	1.14178e-23	1.80867e-23
PPTG_09515		16.7111	66.8991	63.1716	1.94832	1.95374	4.8533e-27	3.6024e-27
PPTG_24347		6.05585	1.06671	0.96899	-2.53038	-2.61342	3.99967e-10	1.2899e-10
PPTG_20012		11.1641	31.6071	25.3858	1.43946	1.22013	1.81628e-07	1.33531e-05
PPTG_10527		5.24688	2.22376	2.09006	-1.28811	-1.29581	5.98769e-09	5.75237e-09
PPTG_18391		33.3798	5.11882	7.12593	-2.7194	-2.19753	1.05046e-08	4.30387e-06
PPTG_04448		5.72468	17.4634	15.7751	1.56298	1.49804	2.62241e-15	4.11608e-14
PPTG_16678		8.18591	3.42435	2.73433	-1.30543	-1.54635	1.00016e-05	1.72594e-07
PPTG_12040		4.45409	0.604891	0.498154	-2.94554	-3.12477	1.84559e-22	3.85195e-24
PPTG_04684		4.73746	9.88323	10.5671	1.01078	1.18336	4.83263e-07	2.41881e-09
PPTG_18397		4.88696	11.6674	11.2127	1.21979	1.22472	0.000374897	0.000363015
PPTG_04339		3.39697	9.2419	9.54133	1.4114	1.52298	8.53769e-09	4.21546e-10
PPTG_21451		3.64289	0.87254	0.962589	-2.10467	-1.88983	8.742e-14	1.69622e-11
PPTG_17548		5.28338	20.8498	20.4166	1.93558	1.98156	7.36379e-09	3.09914e-09
PPTG_05003		4.91374	2.24215	2.09424	-1.15805	-1.19641	0.0363399	0.0312805
PPTG_04919		6.65167	3.46043	3.09816	-1.00117	-1.07539	4.87887e-06	1.00808e-06
PPTG_03402		6.52405	16.0784	15.0231	1.26255	1.23684	1.22378e-14	4.80983e-14
PPTG_06913		7.81309	2.25513	1.89363	-1.83643	-2.01474	8.76106e-15	6.12161e-17
PPTG_03677		8.42182	27.2839	31.8154	1.6418	1.96091	0.000474593	2.21739e-05
PPTG_22554		5.91502	28.3437	26.123	2.20072	2.17774	7.36652e-19	1.80279e-18
PPTG_01081		10.9492	2.96486	2.62234	-1.92981	-2.03444	9.02183e-06	3.07483e-06
PPTG_11685		4.9275	17.9581	18.4521	1.82582	1.93356	1.5017e-10	9.67254e-12
PPTG_21018		3.09527	1.58872	1.15954	-1.02216	-1.38587	0.00267128	3.31204e-05
PPTG_03466		4.77025	21.29	22.4055	2.12077	2.26534	1.18772e-22	8.72414e-26
PPTG_11613		3.26389	1.45392	1.31919	-1.20679	-1.27624	9.51125e-07	2.44683e-07
PPTG_04602		4.78618	2.35438	1.90075	-1.06807	-1.30287	0.000180002	4.20847e-06
PPTG_16865		8.24655	30.9507	32.3715	1.85866	2.0056	7.51071e-10	2.44543e-11
PPTG_15086		10.2261	49.1436	48.9485	2.20931	2.29783	1.20793e-07	3.51292e-08
PPTG_13916		6.27579	22.4443	24.4039	1.78617	1.99029	1.10254e-13	8.12769e-17
PPTG_10256		9.91687	0.859194	1.2208	-3.57394	-2.98209	4.0072e-08	4.13095e-06
PPTG_15083		4.0674	2.07381	1.7358	-1.02452	-1.19891	0.00128183	0.000152417
PPTG_12310		6.7616	0.269618	0.297432	-4.67198	-4.48062	2.66736e-13	1.59844e-12
PPTG_15515		7.1491	14.8906	15.9618	1.01349	1.19397	1.46945e-06	9.16777e-09
PPTG_17476		1.86231	0.354606	0.270674	-2.416	-2.74681	2.12612e-12	5.30963e-15
PPTG_19131		4.48561	1.54984	1.58115	-1.57569	-1.46422	0.000687641	0.00177995
PPTG_13870		1.94763	0.934857	0.883891	-1.10077	-1.10352	5.29909e-09	5.67744e-09
PPTG_09546		11.051	28.844	24.4741	1.32561	1.17707	9.69513e-13	3.60261e-10
PPTG_00522		5.02622	21.1036	21.0483	2.0361	2.09876	5.36311e-14	8.04594e-15
PPTG_03704		4.2968	0.408077	0.404594	-3.42979	-3.37925	4.47782e-19	1.61481e-18
PPTG_15073		7.11946	0.358451	0.346291	-4.35261	-4.32622	3.37286e-13	5.42181e-13
PPTG_08864		7.12962	1.71147	1.26059	-2.09083	-2.46785	1.42726e-09	1.80673e-12
PPTG_10877		4.72168	2.08925	1.8043	-1.21078	-1.3597	0.000108728	1.33866e-05
PPTG_02152		5.2595	13.7751	14.1664	1.34535	1.46217	4.40173e-17	4.63682e-20
PPTG_02365		8.77677	26.6796	24.8769	1.55241	1.53033	1.06059e-15	2.88327e-15
PPTG_06664		4.14165	0.69113	0.582334	-2.61764	-2.79849	6.24418e-07	1.19572e-07
PPTG_04619		6.03442	1.53715	1.69826	-2.01075	-1.80194	6.3783e-08	1.34921e-06
PPTG_00849		5.34342	14.8945	11.5167	1.41619	1.14148	5.83318e-09	4.2506e-06
PPTG_21452		4.49479	1.38072	1.19242	-1.75384	-1.87978	7.0132e-07	1.19572e-07
PPTG_19369		5.1286	18.3901	19.2929	1.81137	1.95087	0.000715843	0.000249666
PPTG_08881		2.58298	9.07745	11.9902	1.76464	2.26111	0.0205793	0.00237109
PPTG_05249		6.30731	20.8917	15.3043	1.67981	1.31559	4.56931e-13	2.72091e-08
PPTG_04215		4.37185	9.81166	8.98569	1.10746	1.07418	6.49638e-06	1.34324e-05
PPTG_17694		10.4996	23.5254	20.9783	1.10661	1.03154	1.14102e-09	1.81221e-08
PPTG_06778		4.73345	12.2448	10.6041	1.30688	1.20005	4.34283e-05	0.000205256
PPTG_11082		5.37129	34.0089	38.0969	2.61975	2.87179	0.0199526	0.0103132
PPTG_12706		5.28678	0.864144	1.11848	-2.65848	-2.19033	0.00592666	0.0266262
PPTG_00382		7.00558	19.9364	17.4115	1.46451	1.34473	5.60389e-05	0.000253703
PPTG_06239		5.55423	0.812983	0.831043	-2.80867	-2.70642	2.45028e-18	3.20906e-17
PPTG_10890		6.89036	2.80581	2.84841	-1.35195	-1.24601	1.53546e-05	7.52371e-05
PPTG_06443		6.06308	2.156	2.45307	-1.53077	-1.26761	3.49161e-05	0.00072935
PPTG_12172		3.83525	1.61036	1.51602	-1.28985	-1.2971	0.014006	0.0140207
PPTG_00523		4.13826	18.5792	34.5501	2.13097	3.09854	0.00259439	5.65171e-06
PPTG_12313		11.5865	2.75531	2.70865	-2.12319	-2.06934	6.55229e-11	2.04171e-10
PPTG_18474		14.7473	3.97667	4.06088	-1.93962	-1.82673	3.38426e-09	2.74911e-08
PPTG_07566		5.93546	15.3736	13.2711	1.31068	1.19204	2.43937e-08	5.06852e-07
PPTG_12213		12.8921	42.1208	44.2974	1.65222	1.81035	1.68221e-17	6.92348e-21
PPTG_10445		4.17139	0.319788	0.268447	-3.7214	-3.92769	8.38204e-15	1.2076e-15
PPTG_09194		5.15414	11.3689	12.1303	1.10608	1.27333	0.00490405	0.00102788
PPTG_21366		17.9707	79.4117	83.882	2.10091	2.26356	6.88762e-07	7.85602e-08
PPTG_20379		3.81576	0.517741	0.0762404	-2.92588	-5.60908	4.85906e-09	1.5965e-17
PPTG_11988		18.2459	208.534	255.101	3.47067	3.85132	0.000722047	0.000154834
PPTG_10883		10.5111	3.47132	3.06065	-1.64552	-1.75227	6.90319e-07	1.51442e-07
PPTG_07267		12.8442	3.15606	2.60973	-2.097	-2.27075	6.63761e-08	6.38056e-09
PPTG_03777		3.26028	0.861314	0.994283	-1.95543	-1.68515	1.86469e-06	4.48758e-05
PPTG_16318		2.90993	1.18595	1.01658	-1.34836	-1.48061	1.14264e-07	6.87286e-09
PPTG_02209		5.0791	2.40733	2.45904	-1.12154	-1.01116	1.66566e-07	2.6819e-06
PPTG_00423		15.6087	36.4175	30.9112	1.16697	1.02115	7.0042e-09	5.72069e-07
PPTG_07836		3.5767	56.6896	81.0348	3.95035	4.55141	0.00601925	0.0013433
PPTG_09879		2.74559	0.442348	0.379665	-2.68378	-2.82077	1.63954e-12	2.1918e-13
PPTG_19675		5.29278	1.79591	1.77152	-1.59069	-1.54961	5.37337e-05	9.02336e-05
PPTG_17900		1.68076	0.569761	0.563937	-1.60361	-1.54287	1.41667e-09	6.20104e-09
PPTG_06537		7.38421	15.6375	15.0211	1.03743	1.05614	7.04321e-09	3.75079e-09
PPTG_03686		3.83556	1.22495	1.27519	-1.6828	-1.55702	1.80765e-10	3.74948e-09
PPTG_08990		4.61645	47.3487	50.6759	3.29578	3.49834	2.10056e-06	4.37295e-07
PPTG_17781		5.21391	0.928518	0.766306	-2.54052	-2.7308	8.9592e-12	4.14068e-13
PPTG_21138		22.6067	7.2936	10.8617	-1.66305	-1.02119	3.87708e-08	0.000957137
PPTG_01337		5.45906	11.8751	12.6303	1.07849	1.24219	1.80755e-11	5.00435e-15
PPTG_08805		2.19154	0.460218	0.649853	-2.28758	-1.7208	2.91098e-17	5.75567e-11
PPTG_18705		14.1179	4.30399	3.20657	-1.7548	-2.10887	1.27339e-10	5.45309e-14
PPTG_11321		3.68577	1.5362	1.59527	-1.29511	-1.17869	1.92973e-05	0.00011365
PPTG_10485		16.6111	7.79591	5.61863	-1.12926	-1.52922	3.73649e-05	2.22069e-08
PPTG_17541		2.95493	6.29004	6.5676	1.04674	1.19135	0.00152007	0.000260908
PPTG_12024		7.60427	0.982098	0.602359	-2.97823	-3.62418	2.29295e-09	3.99634e-12
PPTG_18386		3.22749	10.7897	10.5438	1.71088	1.75008	0.00328305	0.00265266
PPTG_15267		7.57692	20.4367	24.5275	1.38248	1.74112	0.0179781	0.00232162
PPTG_00340		0.384243	0.111785	0.100568	-1.8244	-1.90701	1.83475e-10	4.07455e-11
PPTG_22734		5.12019	2.37569	2.12156	-1.14946	-1.24162	4.82704e-06	9.12879e-07
PPTG_06194		3.33925	1.48964	1.60978	-1.21251	-1.02272	4.50041e-08	4.24879e-06
PPTG_04027		6.03952	2.74354	2.22123	-1.19223	-1.41327	7.59947e-05	2.68607e-06
PPTG_22527		3.69314	1.28022	0.992717	-1.57875	-1.86295	7.54776e-07	5.7878e-09
PPTG_18349		3.62211	12.4394	14.4109	1.73557	2.0361	0.0436925	0.0164347
PPTG_01481		4.51473	10.726	12.4841	1.20375	1.50029	3.62912e-07	1.11456e-10
PPTG_10927		5.85432	2.42536	1.91437	-1.31141	-1.57839	0.000104025	2.95596e-06
PPTG_18252		18.1023	38.9765	37.2298	1.05806	1.07497	1.61375e-12	7.34895e-13
PPTG_17545		1.81708	0.622352	0.688744	-1.58427	-1.36887	3.6899e-07	1.20413e-05
PPTG_24218		8.31086	2.25532	1.70172	-1.93664	-2.25972	7.00358e-07	8.26197e-09
PPTG_19190		8.62664	20.3107	18.149	1.18937	1.10227	2.95508e-09	4.96632e-08
PPTG_04258		11.5708	30.7096	27.6858	1.35621	1.28901	0.000830947	0.00164309
PPTG_17294		12.2615	1.11849	1.40988	-3.47699	-3.08937	2.65612e-19	1.8041e-16
PPTG_18903		4.52123	1.59512	1.14794	-1.54876	-1.94895	1.93671e-08	4.32279e-12
PPTG_01599		6.34558	1.79104	1.64057	-1.86569	-1.91769	1.33672e-11	4.91258e-12
PPTG_22968		37.1675	16.7674	16.5697	-1.19052	-1.13557	8.56472e-07	3.00751e-06
PPTG_10483		19.1359	0	0	-9.98262	-9.92672	9.45499e-15	1.31482e-14
PPTG_12463		2.8394	0.460102	0.524542	-2.64222	-2.40472	5.65716e-10	1.50982e-08
PPTG_10701		9.0472	0.0371395	0.0540816	-7.99879	-7.35896	2.46648e-12	1.22534e-14
PPTG_07841		11.6083	2.7583	1.91065	-2.12633	-2.57013	8.15741e-06	1.04416e-07
PPTG_19367		10.5683	23.0387	22.1212	1.07456	1.10093	1.8511e-08	8.11753e-09
PPTG_16614		4.12234	0.459904	0.239141	-3.20529	-4.08003	2.56134e-23	3.23509e-28
PPTG_17586		3.97868	1.76844	1.21344	-1.22937	-1.68491	1.17335e-06	5.75389e-11
PPTG_11362		2.66779	5.67993	5.33315	1.04276	1.0318	1.38564e-07	2.04085e-07
PPTG_09145		41.0657	8.02203	11.5898	-2.40236	-1.77725	0.00128472	0.0208713
PPTG_19572		5.46795	1.24966	1.36908	-2.17591	-1.96508	1.40724e-14	2.68853e-12
PPTG_09909		6.10519	1.29969	1.09917	-2.27021	-2.44442	1.73911e-12	5.67348e-14
PPTG_18927		3.94091	8.6158	9.0266	1.08647	1.228	0.000386097	4.97857e-05
PPTG_20153		11.1168	32.3722	25.6209	1.48318	1.23788	6.16928e-11	8.03316e-08
PPTG_16524		3.37697	1.14434	1.23564	-1.5927	-1.423	1.50742e-06	1.85911e-05
PPTG_19674		3.80202	0.881822	0.504724	-2.15586	-2.87652	1.60762e-09	9.32372e-15
PPTG_17220		4.37153	1.13452	1.19548	-1.98442	-1.83626	6.07243e-17	6.73287e-15
PPTG_03138		4.03101	0.912303	1.40856	-2.1777	-1.49042	5.33298e-07	0.000665579
PPTG_12759		2.0444	0.405559	0.33667	-2.36172	-2.56768	3.2111e-07	3.38675e-08
PPTG_24180		11.8646	5.39279	5.27459	-1.18331	-1.13545	4.70168e-08	1.80224e-07
PPTG_11085		10.6415	26.8453	22.4212	1.28151	1.10839	2.98565e-10	8.05722e-08
PPTG_09477		1.93192	4.62819	4.59456	1.21423	1.28965	2.26764e-05	6.28475e-06
PPTG_08860		4.36592	13.5072	13.6004	1.59512	1.67618	7.05525e-10	7.9907e-11
PPTG_17201		6.51988	1.74223	1.81628	-1.9467	-1.80959	3.27159e-13	1.07833e-11
PPTG_08295		8.95446	21.6269	25.7448	1.21912	1.5571	1.27159e-11	1.24623e-18
PPTG_15060		2.39204	1.10676	1.12743	-1.164	-1.0563	0.000697596	0.00234432
PPTG_16192		3.0616	1.16754	0.888131	-1.44184	-1.75169	1.18657e-05	1.23193e-07
PPTG_04694		2.86628	1.32856	1.17204	-1.15998	-1.25821	1.15699e-05	2.22974e-06
PPTG_15782		7.8033	16.5508	15.4143	1.02975	1.01271	5.73012e-09	1.14539e-08
PPTG_04185		1.17869	0.472416	0.318698	-1.36885	-1.85693	8.29601e-05	1.09792e-07
PPTG_03776		4.63948	1.6616	1.69504	-1.53867	-1.41897	2.208e-08	2.64753e-07
PPTG_11931		3.81634	1.45176	1.74673	-1.42772	-1.09892	0.000111378	0.00359874
PPTG_04121		9.00246	27.9071	32.8928	1.57479	1.90716	0.001058	5.41575e-05
PPTG_19724		12.4401	1.8645	1.838	-2.78062	-2.73524	4.7136e-07	7.67014e-07
PPTG_00229		2.80182	7.50545	5.90328	1.36576	1.11019	1.53676e-07	3.00124e-05
PPTG_03312		2.34052	0.63396	0.433467	-1.93761	-2.40448	8.9989e-09	6.13498e-12
PPTG_00746		6.28448	1.9243	1.83749	-1.74559	-1.74233	6.1891e-07	7.30471e-07
PPTG_02043		9.22279	29.8734	31.4772	1.64767	1.80434	2.11064e-18	5.99351e-22
PPTG_18436		6.64462	0.983165	0.624933	-2.79102	-3.37454	2.49111e-06	2.22069e-08
PPTG_01907		9.82282	2.99594	2.14899	-1.7585	-2.16019	3.1397e-10	6.19515e-14
PPTG_02563		5.64833	0.838963	0.769548	-2.78727	-2.83915	5.27634e-06	3.79039e-06
PPTG_05363		2.29774	0.954407	0.811204	-1.32262	-1.46956	1.78799e-07	9.20297e-09
PPTG_11535		3.33888	1.4026	1.22795	-1.29442	-1.40545	7.83953e-07	9.57617e-08
PPTG_23816		35.5102	113.664	83.1522	1.61409	1.26473	1.96192e-06	0.000281788
PPTG_00123		6.17797	0.191022	0.165785	-5.03218	-5.18202	1.44582e-22	4.82872e-22
PPTG_06229		2.22072	0.897194	0.741534	-1.34089	-1.55155	3.21156e-07	5.12642e-09
PPTG_02154		6.97733	2.55904	2.28668	-1.48198	-1.57079	0.00194227	0.0010187
PPTG_11310		2.35565	0.886298	0.917245	-1.44938	-1.32882	4.24896e-05	0.00019578
PPTG_13984		6.208	1.97231	1.88138	-1.71527	-1.69244	4.04086e-06	5.89004e-06
PPTG_01806		27.7793	6.38152	4.05362	-2.16871	-2.7383	8.6706e-08	4.53858e-11
PPTG_19453		4.51915	11.8131	12.8628	1.34048	1.54209	3.26653e-09	5.87131e-12
PPTG_15681		10.0331	28.0138	26.9677	1.43269	1.46334	6.42267e-07	3.66961e-07
PPTG_03740		9.53417	31.2482	26.7827	1.65213	1.52428	3.66472e-13	2.75119e-11
PPTG_06575		3.78314	1.67686	1.34969	-1.22639	-1.45774	6.10958e-07	4.93262e-09
PPTG_01873		14.2448	5.45766	4.24742	-1.41742	-1.70997	1.15796e-05	1.34097e-07
PPTG_04741		4.90538	2.14375	2.30118	-1.24774	-1.0593	1.41321e-07	8.59198e-06
PPTG_15993		5.37672	12.3758	11.4043	1.15608	1.11988	1.99184e-06	4.63664e-06
PPTG_22377		15.1918	71.029	73.8654	2.16496	2.31974	8.32072e-15	6.64888e-17
PPTG_18553		3.38622	0.950984	0.916219	-1.87458	-1.85012	1.06641e-08	1.87264e-08
PPTG_03497		11.898	3.36808	2.27782	-1.88173	-2.3472	2.9169e-05	1.76117e-07
PPTG_07178		3.84367	1.21222	1.39056	-1.69971	-1.43637	1.71209e-06	5.59042e-05
PPTG_10885		5.55323	2.80657	2.14761	-1.03539	-1.34185	3.98327e-05	1.16188e-07
PPTG_01541		4.2264	9.06319	9.2037	1.05488	1.15676	5.50741e-11	4.45994e-13
PPTG_04819		3.26727	10.6608	11.2157	1.66229	1.81388	2.91684e-23	1.0836e-27
PPTG_21977		5.98197	21.5092	21.4054	1.80364	1.87721	4.24521e-41	1.88712e-44
PPTG_18326		7.61313	3.44658	3.44976	-1.20273	-1.10311	0.000603766	0.00185193
PPTG_10783		3.41011	24.3437	19.6495	2.79309	2.55584	2.643e-11	1.30573e-09
PPTG_10989		20.6838	0.245581	0	-6.49548	-9.30478	1.98485e-12	5.69536e-12
PPTG_11787		20.5882	4.13373	4.51302	-2.355	-2.16005	5.71062e-10	1.09641e-08
PPTG_17280		3.73992	1.80833	1.33731	-1.1006	-1.45758	4.89299e-05	9.62778e-08
PPTG_02696		1.16435	2.6667	2.30078	1.15438	1.01722	0.000768454	0.00365505
PPTG_05207		4.55136	24.5909	38.5233	2.40553	3.12186	0.000908547	1.0371e-05
PPTG_06620		3.31659	0.741695	0.62181	-2.20943	-2.38066	1.76592e-08	1.6832e-09
PPTG_12981		12.8774	26.9205	27.2047	1.01524	1.11497	1.91023e-07	8.37183e-09
PPTG_02898		9.25709	28.2996	24.4791	1.56061	1.43413	5.09627e-15	9.52201e-13
PPTG_09189		3.5456	9.28712	11.4692	1.35655	1.72985	0.0116217	0.000975582
PPTG_06394		1.81028	0.182904	0.0935663	-3.31485	-4.24576	6.17379e-05	4.69926e-07
PPTG_07293		6.33734	28.8264	28.185	2.14083	2.19974	0.0451009	0.040332
PPTG_01947		4.02433	11.3449	11.9585	1.45771	1.604	2.1404e-20	1.22961e-24
PPTG_03507		2.91783	14.6997	14.7271	2.27895	2.36986	9.02183e-06	3.75454e-06
PPTG_15914		37.3113	6.3464	5.23894	-2.57431	-2.79428	1.06686e-05	1.91095e-06
PPTG_01914		11.9149	29.5039	23.6885	1.24264	1.02657	5.24222e-05	0.00110798
PPTG_07195		3.56105	10.4324	17.7036	1.51675	2.35217	0.00150546	2.93946e-07
PPTG_11289		3.22933	1.36248	1.11304	-1.29585	-1.50562	0.000168115	1.25875e-05
PPTG_18475		1.04394	0.447119	0.477906	-1.27472	-1.0967	7.65131e-07	2.30534e-05
PPTG_02431		4.81731	1.4179	1.18686	-1.82041	-1.98912	7.25776e-09	4.23011e-10
PPTG_08231		4.60382	1.39908	1.05249	-1.77193	-2.09823	1.64454e-09	2.23165e-12
PPTG_16308		7.96606	20.8654	19.1469	1.34678	1.30472	8.43734e-08	2.37941e-07
PPTG_15076		2.80038	7.62087	6.15737	1.38791	1.17275	1.03967e-07	9.95583e-06
PPTG_18534		2.61879	0.0766758	0.0801111	-5.0931	-5.0168	7.28656e-16	1.536e-15
PPTG_16237		3.00134	0.0574759	0.0671795	-5.74956	-5.46026	3.28127e-16	1.2579e-15
PPTG_21905		3.23673	1.32161	1.55187	-1.32693	-1.02854	0.000331902	0.00650421
PPTG_13677		4.52051	15.4926	15.8058	1.73485	1.84045	2.12006e-19	9.46406e-22
PPTG_08197		2.40004	0.895739	0.570345	-1.46688	-2.03382	4.58589e-07	1.01689e-11
PPTG_11666		2.99793	9.12705	10.7004	1.55776	1.87315	0.00319889	0.000305297
PPTG_12609		1.58624	0.238553	0.285715	-2.77363	-2.44576	6.72734e-18	4.02213e-15
PPTG_08123		9.93929	2.49912	2.86717	-2.05621	-1.75463	7.72771e-06	0.000150505
PPTG_15295		8.94046	0.51519	0.38194	-4.13875	-4.52044	2.61826e-08	4.09146e-09
PPTG_20350		12.9357	3.28744	2.75314	-2.01817	-2.20007	6.19175e-06	9.24861e-07
PPTG_22367		13.9564	62.7189	64.6844	2.11128	2.24644	1.4817e-16	1.21849e-18
PPTG_17411		3.21988	0.308415	0.279368	-3.46045	-3.49506	1.51745e-10	1.37518e-10
PPTG_07059		2.70262	0.954928	0.879153	-1.53775	-1.58937	1.07607e-06	5.43096e-07
PPTG_04246		6.81677	3.17425	3.00884	-1.14932	-1.14211	6.29026e-07	8.62229e-07
PPTG_07765		6.17498	14.356	13.0456	1.15583	1.10213	1.02781e-05	3.01061e-05
PPTG_01349		3.9356	0.765937	0.675343	-2.42161	-2.50868	7.16272e-10	2.42653e-10
PPTG_00966		1.85853	0.889439	0.888425	-1.10409	-1.02513	0.00247457	0.00541636
PPTG_04577		15.4744	6.57934	5.65723	-1.27615	-1.41554	7.6869e-07	5.59182e-08
PPTG_18215		4.87345	1.74117	1.35872	-1.53285	-1.80561	0.00184832	0.000232959
PPTG_12695		3.29734	1.31038	1.46919	-1.37711	-1.1363	4.87021e-07	3.68679e-05
PPTG_07534		3.06134	1.40357	1.32966	-1.16614	-1.17145	6.55962e-06	6.623e-06
PPTG_09124		6.57923	21.09	19.909	1.62784	1.63412	3.66472e-13	3.12632e-13
PPTG_16307		3.29194	0.655033	0.444563	-2.37863	-2.85761	5.16125e-11	6.84894e-14
PPTG_21805		3.35213	0.252255	0.149722	-3.81249	-4.46136	1.46381e-10	2.05816e-12
PPTG_08666		3.84686	1.50428	1.32764	-1.4135	-1.50134	2.77331e-06	7.2981e-07
PPTG_04384		3.2828	0.896438	1.2527	-1.93403	-1.36098	1.26591e-08	4.86089e-05
PPTG_06640		2.41585	0.838625	0.643202	-1.57139	-1.87486	8.59903e-09	2.16292e-11
PPTG_02951		2.83678	0.970308	0.579097	-1.59469	-2.2574	8.02066e-07	1.06439e-11
PPTG_05893		0.695214	4.56958	5.17764	2.66963	2.92583	1.35381e-22	4.47469e-27
PPTG_23262		2.95233	0.828526	0.84567	-1.88262	-1.77196	2.15083e-11	2.65423e-10
PPTG_11176		13.3869	29.7856	28.0142	1.09824	1.09544	4.5314e-10	5.39494e-10
PPTG_05203		3.32307	19.6752	32.0439	2.53264	3.30634	0.000742419	6.40971e-06
PPTG_16198		2.11664	0.363361	0.477239	-2.58166	-2.10976	1.71715e-07	1.68963e-05
PPTG_10380		2.51168	0.436326	0.366845	-2.57246	-2.74409	9.66881e-07	2.14554e-07
PPTG_05555		9.51637	23.0015	20.1395	1.22487	1.11663	9.32745e-08	1.50499e-06
PPTG_14494		2.42178	7.07241	7.18082	1.49903	1.59868	2.30449e-21	2.88241e-24
PPTG_15980		4.73497	18.6893	18.1134	1.9298	1.97468	1.69005e-10	5.88242e-11
PPTG_02722		10.4364	4.96703	3.76981	-1.12463	-1.43752	7.68231e-05	6.12325e-07
PPTG_18390		4.04899	1.05776	0.632516	-1.98129	-2.64901	3.18965e-15	8.7999e-22
PPTG_06584		2.90381	0.539	0.359383	-2.46666	-2.97791	1.11354e-12	1.94168e-16
PPTG_23461		21.1334	54.6395	53.3666	1.31671	1.37479	6.94873e-05	3.13504e-05
PPTG_08354		2.80574	13.925	15.4188	2.26406	2.49723	6.86665e-06	5.82883e-07
PPTG_10500		3.6125	0.304363	0.167823	-3.64635	-4.40285	7.90806e-11	2.44025e-12
PPTG_07928		2.86778	0.694313	0.482001	-2.09082	-2.54597	3.10191e-10	3.02024e-13
PPTG_04331		15.589	36.6715	34.0733	1.17899	1.16886	0.0223258	0.0245787
PPTG_03400		2.24183	6.04831	5.3079	1.37741	1.26685	3.46842e-17	1.65609e-14
PPTG_01627		4.67918	16.3643	13.5517	1.75686	1.57846	0.000186084	0.000924624
PPTG_05326		1.49194	0.247144	0.333585	-2.61701	-2.12854	2.75731e-14	1.6225e-10
PPTG_08908		2.60819	1.10199	1.03429	-1.29515	-1.30222	5.65661e-06	5.66293e-06
PPTG_16297		9.533	22.1436	18.6045	1.15859	1.0015	5.10627e-05	0.00059826
PPTG_15265		2.79365	15.3716	13.0271	2.41695	2.26006	6.8268e-43	2.72099e-37
PPTG_02687		20.8578	8.46467	6.64965	-1.33812	-1.61201	7.98994e-06	1.08404e-07
PPTG_03080		1.7578	0.319486	0.299205	-2.49009	-2.52232	1.10058e-06	9.26043e-07
PPTG_04817		1.745	0.702624	0.810607	-1.34543	-1.07233	2.85925e-05	0.00098661
PPTG_14539		5.14623	2.22715	2.45498	-1.24193	-1.03688	1.33775e-05	0.000317275
PPTG_20979		2.28533	5.84373	6.12404	1.30251	1.46224	0.0127037	0.00477377
PPTG_06449		1.58861	3.56924	3.51856	1.13308	1.18444	1.13252e-10	1.37132e-11
PPTG_07643		11.3727	0.535572	0.111805	-4.50607	-6.66984	8.33073e-13	3.03932e-11
PPTG_06302		3.25751	0.00778307	0	-8.73848	-9.64438	3.53232e-11	1.97536e-13
PPTG_17127		4.76601	12.1323	12.1062	1.30854	1.38058	6.11103e-07	1.31089e-07
PPTG_18757		3.66611	0.702706	0.576375	-2.46272	-2.64346	0.00141192	0.000666656
PPTG_12009		2.4996	0.409306	0.216756	-2.64197	-3.4999	2.2491e-07	6.73449e-11
PPTG_00993		3.32209	1.17984	1.01282	-1.5437	-1.6882	0.000798258	0.000242855
PPTG_10831		1.57271	4.15279	3.80629	1.35344	1.31429	2.11942e-11	9.01862e-11
PPTG_18074		2.49066	8.47303	8.54152	1.72606	1.81666	2.95437e-22	1.2433e-24
PPTG_12869		3.64146	9.53089	7.92311	1.3408	1.1507	1.60862e-07	9.63984e-06
PPTG_02103		2.00175	7.05712	5.76115	1.75513	1.54474	6.88914e-10	8.3987e-08
PPTG_14587		3.34538	11.07	9.0933	1.67065	1.47514	3.49503e-11	7.40962e-09
PPTG_11419		2.40173	1.1722	0.918074	-1.08109	-1.35075	4.30452e-05	4.3524e-07
PPTG_10700		9.29014	24.6068	19.3433	1.3532	1.09089	6.09731e-07	8.79445e-05
PPTG_10382		2.49902	1.18712	0.866447	-1.13933	-1.49305	0.00112701	1.95989e-05
PPTG_14212		2.38188	0.749573	0.644047	-1.71437	-1.85419	2.61774e-07	3.37201e-08
PPTG_13961		5.10521	11.9198	12.3872	1.18626	1.31681	3.95129e-10	2.48323e-12
PPTG_01136		3.22814	10.0163	8.37379	1.57477	1.40901	5.09416e-12	9.68825e-10
PPTG_02336		2.72898	0.887862	0.570633	-1.67349	-2.2192	5.30557e-05	9.77024e-08
PPTG_10750		2.8571	0.477801	0.78042	-2.60695	-1.84138	1.76748e-15	2.69079e-09
PPTG_08129		2.67311	0.789335	0.73886	-1.8165	-1.82608	2.52053e-10	2.50947e-10
PPTG_04552		3.7211	10.3127	13.4797	1.43463	1.89462	0.0387426	0.00496182
PPTG_12440		3.33675	9.73287	11.5435	1.5183	1.82981	1.21077e-05	8.7526e-08
PPTG_16310		1.0652	3.10351	2.91462	1.5023	1.48686	1.09896e-09	1.7049e-09
PPTG_14809		1.44184	0.552461	0.285885	-1.44464	-2.30762	0.000957318	3.00661e-07
PPTG_03961		2.31833	1.02019	1.12957	-1.22651	-1.01057	4.63649e-06	0.000169767
PPTG_17835		4.91581	2.35783	2.23711	-1.09816	-1.09703	0.00572305	0.00603232
PPTG_11482		2.56057	6.249	6.11092	1.25004	1.29402	9.86816e-07	3.92987e-07
PPTG_10375		4.68416	12.9644	11.9093	1.41474	1.3863	5.94292e-09	1.31471e-08
PPTG_15039		2.23428	12.3216	5.31752	2.41257	1.27287	2.4515e-13	0.000268586
PPTG_03161		2.22585	0.288924	0.27126	-2.96356	-2.99782	1.02091e-06	9.02712e-07
PPTG_00246		2.72912	0.327047	0.288829	-3.09984	-3.20799	2.5375e-08	1.16646e-08
PPTG_00530		2.903	18.1869	18.3373	2.6014	2.69888	6.36407e-35	1.64005e-37
PPTG_00859		1.61208	0.116379	0.0790644	-3.81405	-4.30832	3.82526e-06	4.59339e-07
PPTG_03827		5.0264	0.946049	0.820231	-2.4788	-2.5723	0.000153563	9.20819e-05
PPTG_02587		4.29473	1.87125	1.38682	-1.26574	-1.59675	0.00420187	0.000283713
PPTG_12575		15.0365	4.96633	3.29262	-1.65863	-2.1562	9.5923e-06	1.35783e-08
PPTG_15417		1.87486	0.808493	0.712485	-1.26551	-1.36571	8.9727e-06	1.95934e-06
PPTG_02382		1.87554	5.04417	4.44942	1.37501	1.28291	1.60762e-09	2.38668e-08
PPTG_08940		7.73805	30.6507	37.2956	1.93516	2.31204	0.000599502	3.06438e-05
PPTG_12745		1.90613	0.644607	0.77169	-1.62857	-1.27336	6.8761e-09	4.5126e-06
PPTG_16186		3.51871	0.0627521	0.152282	-5.85414	-4.48976	4.76265e-08	9.04524e-06
PPTG_02788		2.31383	1.13727	0.916822	-1.06538	-1.30763	0.000677757	3.3654e-05
PPTG_09501		7.12685	30.9068	27.9347	2.05461	2.0051	2.48609e-15	1.22737e-14
PPTG_19938		12.8939	0.183438	0.308867	-6.23965	-5.34778	5.11552e-15	4.45534e-16
PPTG_04395		2.12695	0.42141	0.448584	-2.36776	-2.2165	2.49377e-14	5.55259e-13
PPTG_05551		2.61604	0.738621	1.04735	-1.87357	-1.28798	1.15989e-06	0.00087993
PPTG_14291		3.28968	1.45346	1.14204	-1.23084	-1.48835	0.000576203	3.16999e-05
PPTG_09365		9.77077	2.51835	2.23807	-1.98702	-2.09156	1.62195e-05	5.863e-06
PPTG_03847		1.65649	4.60837	4.52065	1.43536	1.4923	0.00166011	0.00105091
PPTG_22194		2.50682	0.455696	0.856137	-2.52556	-1.51788	5.23219e-08	0.000744592
PPTG_08875		2.71108	0.019437	0.0195997	-7.10524	-7.05108	3.27912e-11	4.69265e-11
PPTG_07345		1.43282	0.163335	0.0661555	-3.144	-4.41353	0.00123298	8.74078e-06
PPTG_01182		2.81479	1.06298	0.62399	-1.42126	-2.14651	0.0134468	0.000149798
PPTG_14622		3.13706	0.985543	0.808497	-1.71497	-1.92414	3.78972e-08	1.24778e-09
PPTG_07867		1.47211	9.67003	11.641	2.6702	3.01785	2.82005e-35	5.24887e-45
PPTG_03148		4.16393	0.857203	1.68498	-2.30115	-1.27823	2.30721e-05	0.0232905
PPTG_12465		2.62663	0.700281	0.67638	-1.95051	-1.9265	0.000133027	0.000169538
PPTG_08878		3.34407	21.2753	21.4679	2.61794	2.7243	0.000673168	0.000391645
PPTG_11833		1.09454	0.409355	0.409971	-1.46204	-1.38421	6.17379e-05	0.000163457
PPTG_19744		3.87714	1.40737	1.22853	-1.48382	-1.61969	0.0180739	0.00977502
PPTG_12836		3.07799	1.44967	1.22533	-1.13949	-1.29177	0.000437357	6.71589e-05
PPTG_05997		2.33169	6.25471	5.57768	1.3776	1.29519	7.1001e-10	8.54067e-09
PPTG_14313		5.4024	0.322997	0.237953	-4.07715	-4.4769	3.45728e-09	5.83683e-10
PPTG_22058		5.44849	0.297914	0.193071	-4.26739	-4.77456	1.35449e-09	1.25359e-10
PPTG_03241		7.23903	1.5669	1.33931	-2.25142	-2.40515	1.05342e-12	1.21779e-13
PPTG_00440		6.9883	46.4908	35.1501	2.69084	2.35899	5.61068e-12	2.14926e-09
PPTG_03432		3.06493	0.60309	0.654792	-2.4018	-2.18368	4.90353e-05	0.000238792
PPTG_15306		3.81264	1.36358	1.36238	-1.52807	-1.45417	9.42253e-06	2.72253e-05
PPTG_10844		2.81893	1.00224	0.743409	-1.54787	-1.88761	0.0128513	0.00218752
PPTG_13370		2.10769	5.08291	5.04742	1.23903	1.29756	1.07026e-05	3.8144e-06
PPTG_18665		4.65691	14.1902	13.3124	1.56365	1.55044	3.7839e-14	6.85106e-14
PPTG_21617		1.35276	3.80047	3.02577	1.44015	1.19934	2.50885e-08	5.1395e-06
PPTG_20266		4.72218	0.240736	0.116854	-4.34604	-5.29453	5.72989e-15	3.62567e-15
PPTG_00055		4.2915	0.921339	1.11462	-2.25885	-1.90771	1.3599e-07	6.69409e-06
PPTG_03603		5.82989	0.0152506	0.17031	-8.60719	-5.06341	1.50852e-10	1.06876e-14
PPTG_19772		7.30129	2.17493	2.79207	-1.77534	-1.34797	2.21976e-07	7.82345e-05
PPTG_14546		3.17418	0.22966	0.116819	-3.85327	-4.73076	6.57967e-09	1.71882e-11
PPTG_13756		2.51081	5.7167	4.94813	1.12927	1.00066	2.44999e-07	6.83206e-06
PPTG_03008		2.48204	14.6505	21.2174	2.51745	3.14208	2.24759e-07	5.28292e-11
PPTG_10900		1.35214	0.626423	0.562599	-1.15148	-1.23781	0.001581	0.000709369
PPTG_00880		3.00762	1.08178	1.22348	-1.51672	-1.26772	1.24464e-06	5.37296e-05
PPTG_02639		2.85844	7.1645	5.79539	1.26447	1.05462	1.33601e-05	0.000387934
PPTG_09526		2.21882	8.01871	9.93351	1.82903	2.19613	0.00107208	6.47586e-05
PPTG_17337		13.6257	2.26761	1.38371	-2.61296	-3.26482	8.51201e-07	2.28228e-09
PPTG_04299		1.60079	0.170414	0.223515	-3.28761	-2.80787	1.80867e-12	9.13194e-10
PPTG_24416		6.81972	22.622	23.0447	1.66476	1.79737	0.014492	0.00802946
PPTG_04420		1.9311	8.33622	8.10238	2.06958	2.09964	1.11795e-14	4.38885e-15
PPTG_07694		4.62019	0.281627	0.227246	-4.06031	-4.30317	9.09201e-09	2.92428e-09
PPTG_02565		1.84758	0.125752	0.0476797	-3.8766	-5.25289	3.60208e-05	1.91933e-07
PPTG_18922		19.3184	4.33063	5.33491	-2.20978	-1.81457	0.000397817	0.0041372
PPTG_04753		3.30134	0.976306	0.870847	-1.80297	-1.88252	1.41747e-06	5.67463e-07
PPTG_14322		3.96891	9.38774	8.98585	1.19412	1.2059	1.3241e-07	1.04651e-07
PPTG_07863		2.27192	4.77798	5.54531	1.04424	1.31491	0.00194839	6.37119e-05
PPTG_19720		4.3516	0.710784	0.459192	-2.65276	-3.21187	0.000422353	2.40118e-05
PPTG_18620		2.96545	0.820735	0.501023	-1.89451	-2.53639	0.000135309	5.53893e-07
PPTG_17630		0.9406	0.188789	0.197888	-2.37814	-2.21944	3.35596e-08	2.41121e-07
PPTG_00202		2.62177	10.7723	9.06189	1.98613	1.82433	2.3404e-12	1.59264e-10
PPTG_20843		4.91475	0.483126	1.01819	-3.41426	-2.23605	8.65229e-15	6.84902e-09
PPTG_18998		2.01807	0.38154	0.342122	-2.46389	-2.52668	8.62613e-06	5.84725e-06
PPTG_06248		6.12794	15.6	15.8778	1.28611	1.41591	0.0389637	0.0221973
PPTG_07252		4.19232	1.04259	1.26596	-2.04058	-1.69665	0.00064033	0.00491108
PPTG_14429		1.72389	0.250637	0.221527	-2.82523	-2.92232	1.61723e-10	6.55313e-11
PPTG_01768		5.19906	17.7897	14.1746	1.71478	1.46529	1.95266e-10	8.84709e-08
PPTG_03006		1.52067	4.49481	5.48419	1.51388	1.89805	0.0428201	0.00938772
PPTG_13250		1.66581	4.09226	4.34796	1.25411	1.41747	7.88387e-13	2.90047e-16
PPTG_18292		2.57765	0.373906	0.230659	-2.82907	-3.43841	3.04632e-06	4.1067e-08
PPTG_03052		2.29468	0.525294	0.368813	-2.18365	-2.60374	5.72492e-09	2.29575e-11
PPTG_18743		8.31179	0.467122	0.89014	-4.18948	-3.17755	3.07068e-05	0.00156083
PPTG_15389		6.00068	1.81372	1.56062	-1.78824	-1.9106	2.23833e-06	5.55402e-07
PPTG_04565		2.1221	0.878206	0.780356	-1.32332	-1.39942	0.0407949	0.0310177
PPTG_21645		2.15638	0.792931	0.954785	-1.4979	-1.14236	6.1251e-05	0.00263498
PPTG_12493		1.79099	4.09224	4.35525	1.13513	1.30738	1.73864e-05	5.33117e-07
PPTG_17582		14.5607	33.7139	30.8178	1.14858	1.10175	3.05079e-07	1.07361e-06
PPTG_16762		4.12324	10.7477	8.29579	1.3322	1.04545	3.38263e-07	0.000102191
PPTG_12157		3.36881	8.76801	13.2999	1.34304	2.01665	0.000193042	6.00163e-09
PPTG_03156		3.33927	0.158773	0.147252	-4.41376	-4.47946	1.23918e-06	1.03743e-06
PPTG_06424		1.6699	0.517178	0.493996	-1.73245	-1.72837	3.26932e-07	4.01709e-07
PPTG_15169		3.16915	0.937233	1.09589	-1.77129	-1.48838	0.00925058	0.0324247
PPTG_02881		2.21866	5.92481	5.96426	1.37079	1.45571	9.42844e-11	4.86721e-12
PPTG_24209		9.62984	0.196587	0.231669	-5.68548	-5.37019	1.98288e-10	2.64371e-10
PPTG_10614		3.94184	0.216337	0.174445	-4.25344	-4.47473	6.12425e-14	3.79369e-14
PPTG_00750		1.478	0.100993	0.109136	-3.91651	-3.72808	6.88403e-19	5.40368e-18
PPTG_19482		14.3877	4.89293	4.91411	-1.59911	-1.51066	0.000298939	0.000679473
PPTG_04704		0.63426	0.280472	0.271221	-1.22586	-1.19107	0.00229549	0.00328381
PPTG_12766		5.91539	16.3558	13.4205	1.42096	1.21914	2.77464e-09	5.13199e-07
PPTG_24191		7.99062	28.1408	28.9566	1.76049	1.89005	1.0438e-09	4.48815e-11
PPTG_04889		0.910843	3.1634	2.87037	1.75262	1.69258	1.3255e-28	1.53414e-26
PPTG_24836		34.3897	0.139572	0.812969	-7.91453	-5.35805	7.76793e-07	4.67641e-06
PPTG_16724		2.89551	0.480766	0.574379	-2.63904	-2.29911	1.98059e-08	6.57711e-07
PPTG_05094		2.26531	0.55871	0.52854	-2.05866	-2.07426	0.000119125	0.000115063
PPTG_08809		7.76616	2.55357	3.26635	-1.65548	-1.21751	2.49111e-06	0.000487399
PPTG_07984		4.1214	0.880478	0.608603	-2.26277	-2.7298	1.4982e-07	5.31752e-10
PPTG_10074		1.62187	3.85535	3.59685	1.21053	1.17655	8.30688e-07	1.9472e-06
PPTG_20180		4.7699	11.137	11.5591	1.153	1.30231	0.000203286	2.16952e-05
PPTG_06941		1.32264	4.17494	3.85246	1.6037	1.57541	2.51769e-06	4.11141e-06
PPTG_00958		1.80606	0.0590737	0	-4.9545	-8.55375	4.23362e-11	1.61955e-10
PPTG_05309		0.727109	0.200926	0.151822	-1.9341	-2.23092	0.000601549	9.5763e-05
PPTG_13472		2.09749	0.311971	0.0942438	-2.76583	-4.44272	9.5296e-11	6.39459e-15
PPTG_06719		1.53285	0.199027	0.165085	-2.97916	-3.17798	4.86391e-09	7.76473e-10
PPTG_02998		1.89558	9.79509	9.08181	2.31259	2.30044	2.94898e-08	3.66374e-08
PPTG_08665		4.61235	0.795356	0.391212	-2.59387	-3.52902	0.000167673	6.92859e-07
PPTG_03781		2.43036	0.922318	1.03794	-1.44793	-1.18599	0.000330988	0.00376208
PPTG_04735		1.81258	6.38103	6.12781	1.77011	1.78753	3.81111e-17	1.90937e-17
PPTG_05438		0.689291	0.109688	0.105039	-2.70274	-2.69162	4.9026e-09	7.01395e-09
PPTG_02087		4.42579	0.19737	0.417606	-4.50391	-3.36751	6.03821e-11	2.91096e-08
PPTG_13204		4.19437	0.881828	1.15674	-2.27171	-1.82697	1.38077e-05	0.000465355
PPTG_18587		3.45119	0.364751	0.411016	-3.2786	-3.04229	4.44441e-07	2.79345e-06
PPTG_23536		0.381961	0.981479	1.18807	1.29161	1.66837	0.000791685	8.46919e-06
PPTG_01060		1.82169	5.27027	4.8329	1.49422	1.44804	7.47502e-19	1.28387e-17
PPTG_24145		5.59537	21.0054	17.1243	1.84819	1.64871	1.2989e-12	3.86438e-10
PPTG_19204		2.19232	0.923207	0.61013	-1.28886	-1.81847	0.00487068	6.30514e-05
PPTG_11768		2.44612	5.3558	4.87924	1.06831	1.02147	0.00012865	0.000284648
PPTG_04078		0.508698	1.25674	1.56839	1.27159	1.66743	0.00901481	0.000422587
PPTG_08877		4.8767	14.0912	17.7699	1.49256	1.90663	2.06766e-09	5.43998e-15
PPTG_20414		2.63807	0.913011	1.21428	-1.5808	-1.09141	8.62613e-06	0.00198802
PPTG_18561		1.28333	0.388891	0.39519	-1.76404	-1.66644	4.91186e-07	2.07843e-06
PPTG_08404		20.1894	9.27438	5.52555	-1.19867	-1.83906	0.0400561	0.00118903
[truncated: 1,050 more rows]
